# Supplementary material for: Genome-wide association study of 12 agronomic traits in peach
Source: PubMed Central journal article supplement (PMC5105138; doi:10.1038/ncomms13246), 2016-11-08
Supplement: ncomms13246-s1.pdf [file ncomms13246-s1.pdf]

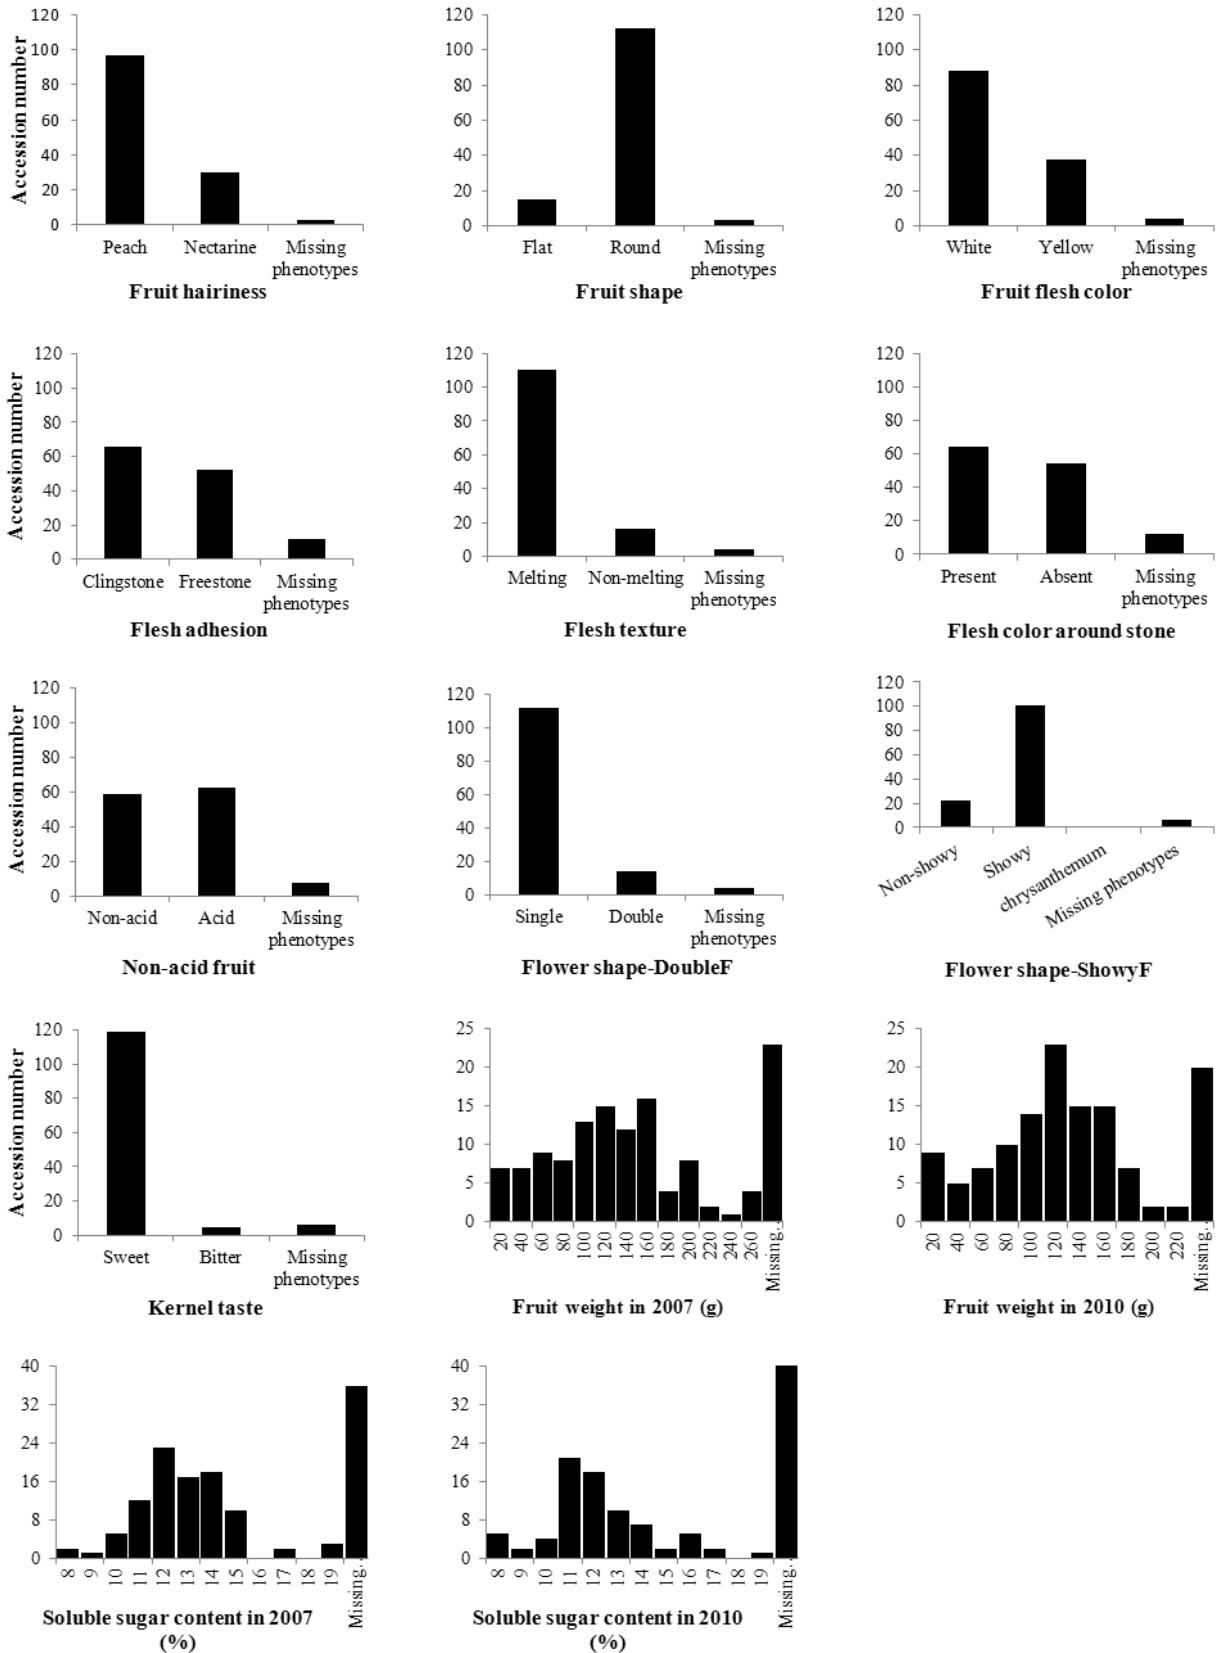

1 **Supplementary Figure 1: Frequency distribution of the variation of 12 traits**  
 2 **across the 129 samples used in the resequencing analysis.**

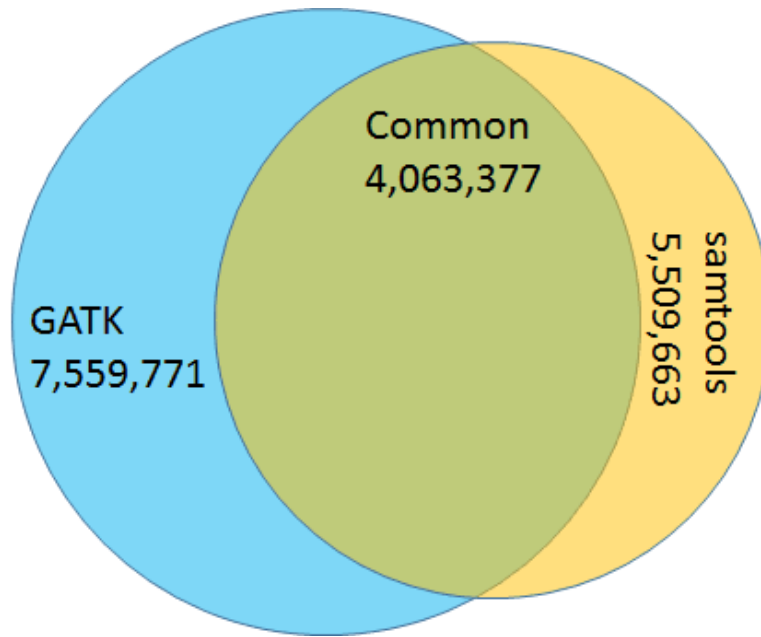

3

4 **Supplementary Figure 2: Venn diagram showing the number of unique and**  
5 **common SNPs which called by the GATK and SAMtools software packages.** The  
6 identification of the SNPs associated with variable characters was the main objective  
7 of this study, differing from a previous paper focusing on peach evolution<sup>7</sup>. Therefore,  
8 two software packages, GATK and SAMtools, were used to detect SNPs and those  
9 detected by both packages (common SNPs), which were classified as reliable SNPs,  
10 were further analysed (Methods).

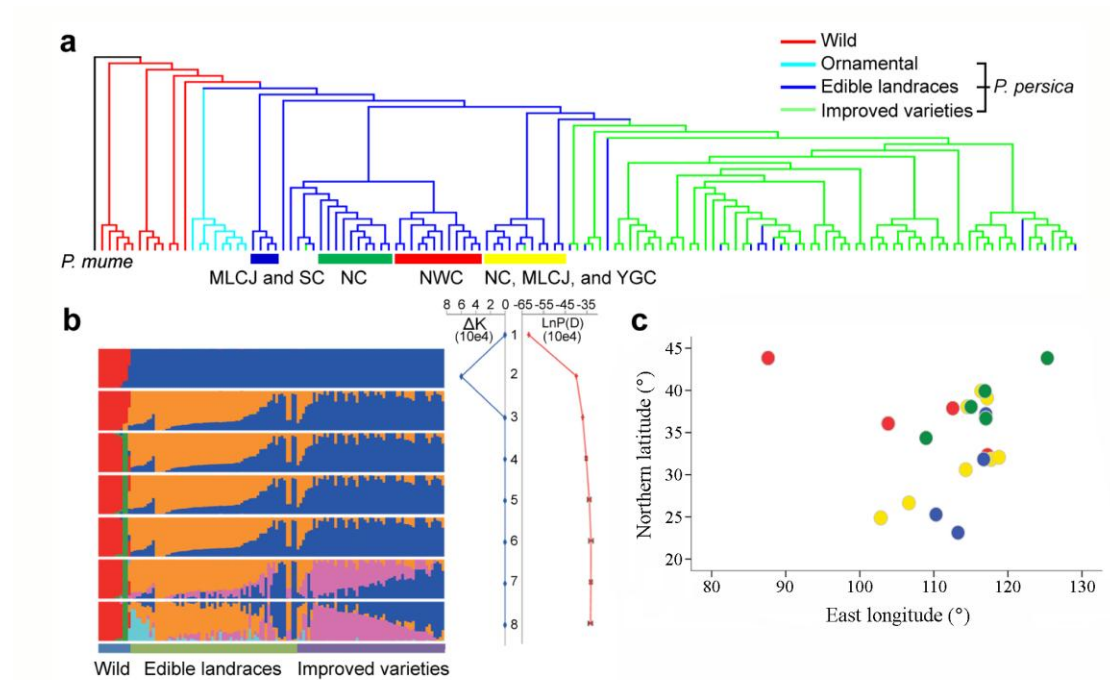

11

12 **Supplementary Figure 3: Peach domestication history. (a) Rooted phylogenetic**  
 13 **tree of the 129 peach accessions considered in this study, based on 4.1 million**  
 14 **SNPs and using *Prunus mume* as the outgroup. (b) Population structure of the**  
 15 **129 peach accessions obtained in FRAPPE analysis. (c) The coordinates of**  
 16 **different geographic distribution of the edible landraces subpopulations. In the**  
 17 **Supplementary Fig. 3a, the four divergent groups, wild, ornamental, edible landraces,**  
 18 **and improved varieties, are coloured in red, cyan, blue, and green, respectively. The**  
 19 **description of all accession derived from two Supplementary Table 1 in this and**  
 20 **previous study<sup>7</sup>. The horizontal bars in blue, green, red, and yellow indicate different**  
 21 **subgroups within the edible landraces group. The geographic origin of each subgroup**  
 22 **is list beneath the bars: Northwest China (NWC), YunGui plateau (YGC), Northern**  
 23 **China (NC), the middle and lower reaches of the Changjiang River (MLCJ), and**  
 24 **Southern China (SC). In the Supplementary Fig. 3b, Different colors represent**  
 25 **different populations according to K (the number of populations) value analysis. In**  
 26 **the Supplementary Fig. 3c, colors are the same as in the horizontal bars of geographic**  
 27 **subgroups present under the phylogenetic tree. Moreover, the coordinates indicate the**  
 28 **longitude and latitude of provincial capital where landraces originated.**

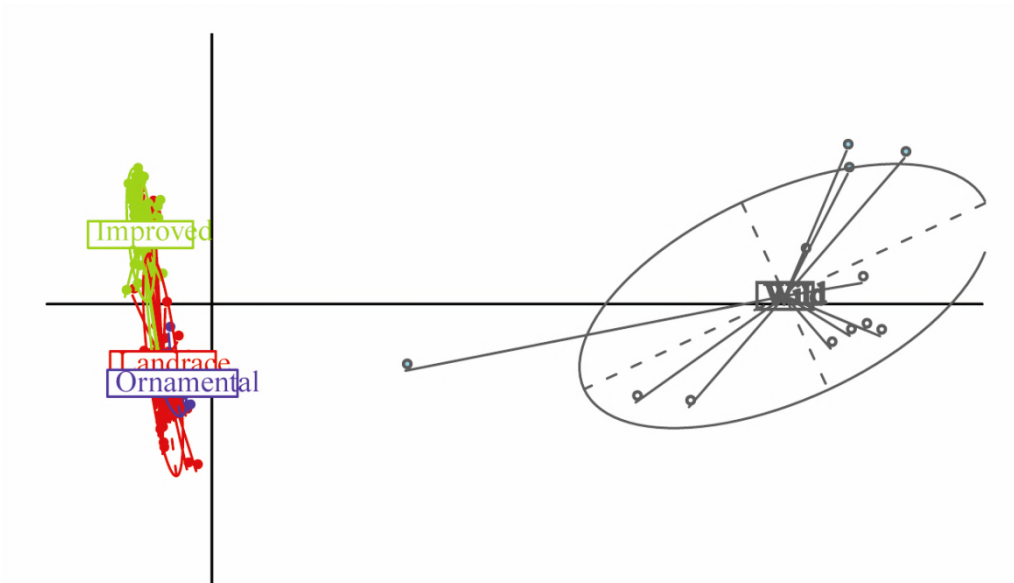

29

30 **Supplementary Figure 4: Principal component analysis of the wild, ornamental,**  
 31 **edible landraces, and improved peach varieties considered in the present study.**

32 All identified common SNPs were used in the principle components analysis. Each  
 33 peach accession is represented by a point in the two-dimensional space defined by the  
 34 eigenvectors of the first and second principal components. Different colours  
 35 correspond to different peach groups: wild peach is indicated in black, edible landrace  
 36 in red, ornamental in blue, and improved varieties in green. Samples distribution  
 37 demonstrates that all cultivated peach varieties are genetically distant from wild peach.

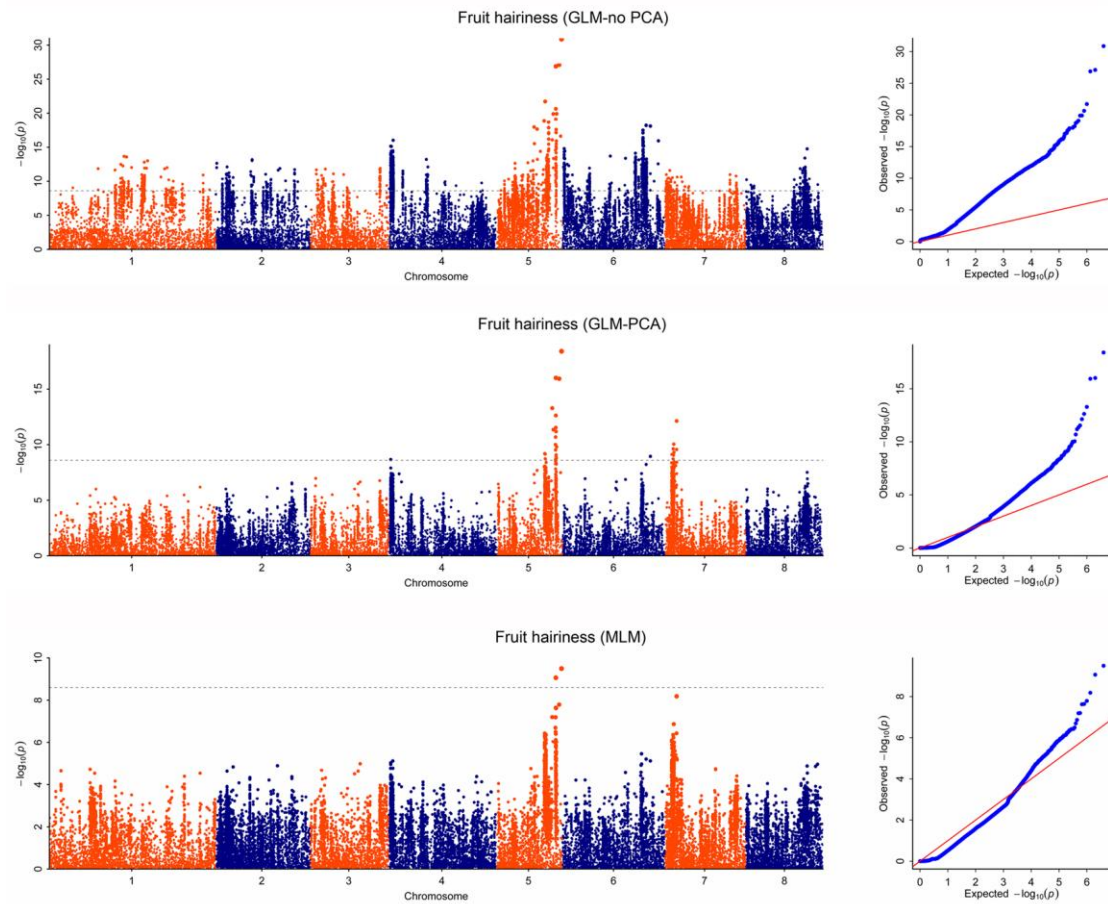

38

39 **Supplementary Figure 5: Manhattan and quantile-quantile plots for**

40 **Genome-wide association studies of fruit hairiness trait in 129 peach accessions**

41 **using three analysis models.** Negative  $\log_{10}$ -transformed P values from the

42 genome-wide scan were plotted against SNPs position on each of the eight

43 chromosomes. The dotted horizontal line indicates the genome-wide significance

44 threshold ( $P = 1.0 \times 10^{-8}$ ). The description of following figures were same as above.

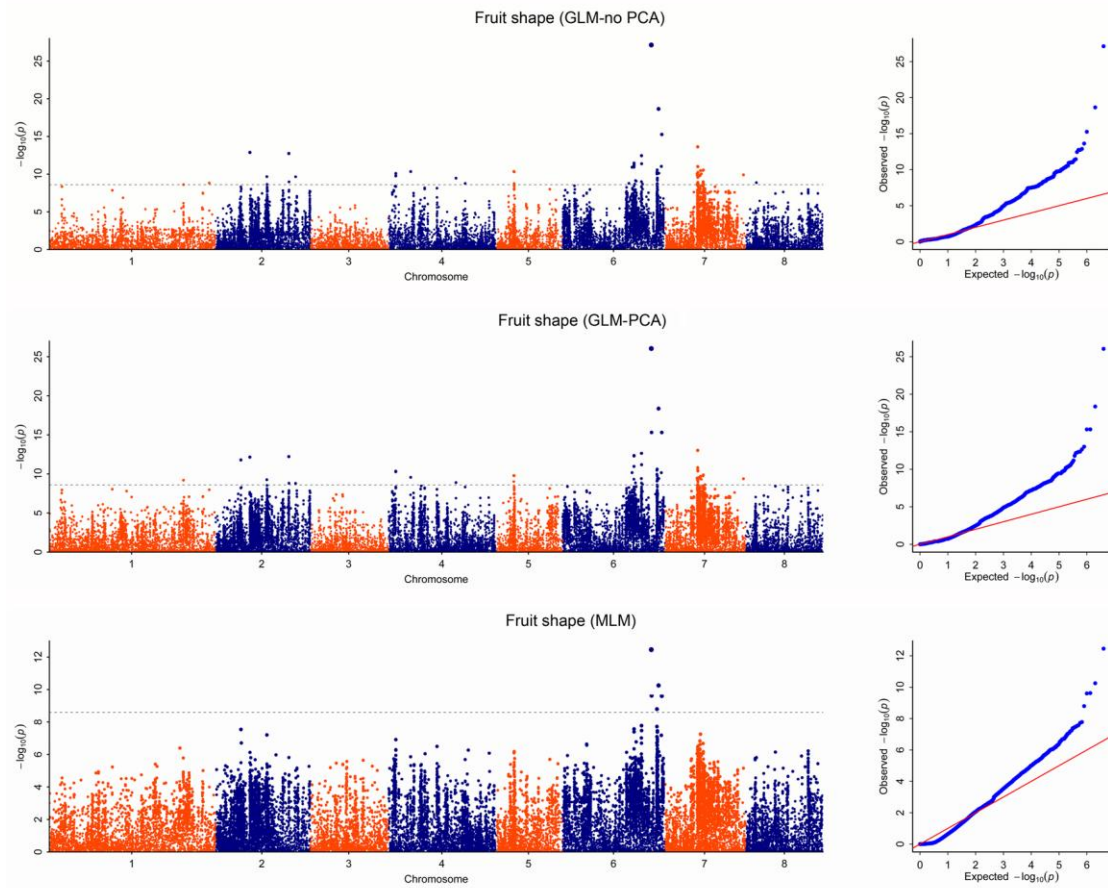

45  
 46 **Supplementary Figure 6: Manhattan and quantile-quantile plots for**  
 47 **Genome-wide association studies of fruit shape trait in 129 peach accessions**  
 48 **using three analysis models.**

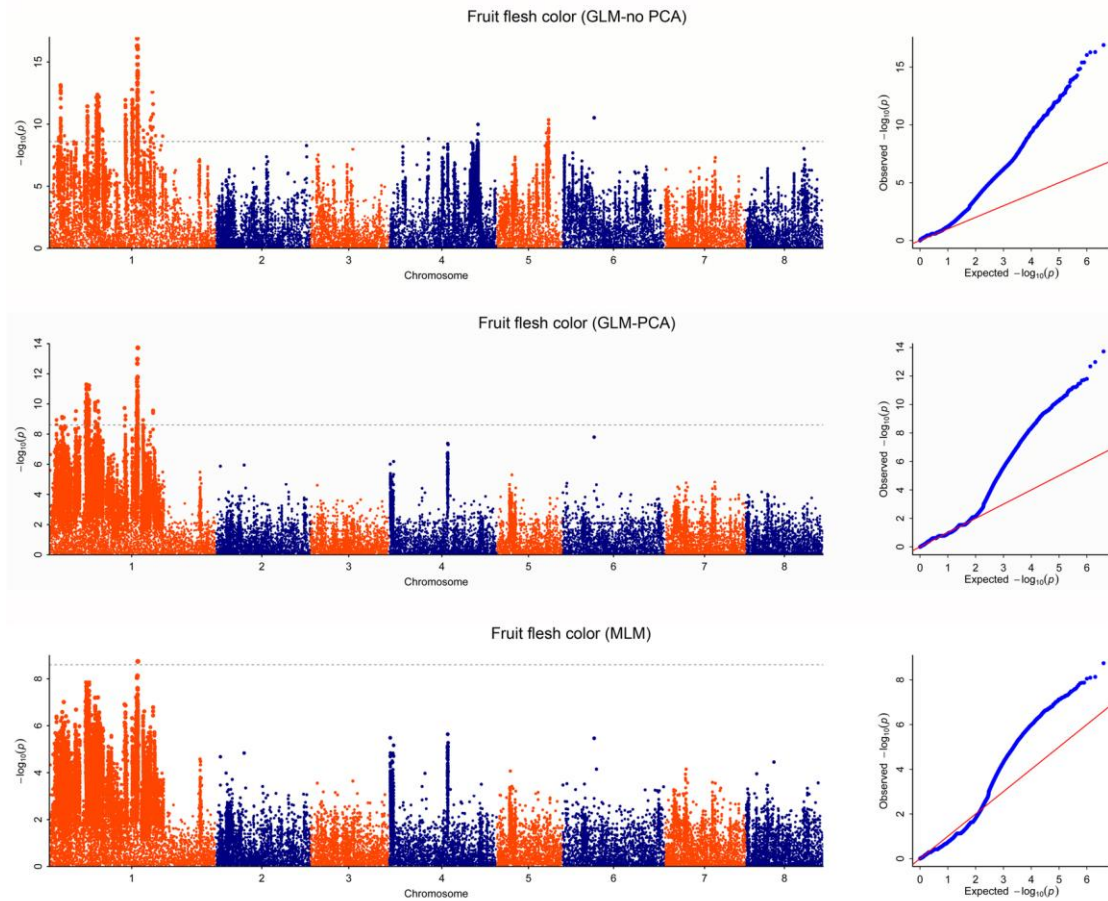

49

50 **Supplementary Figure 7: Manhattan and quantile-quantile plots for**

51 **Genome-wide association studies of fruit flesh color trait in 129 peach accessions**

52 **using three analysis models.**



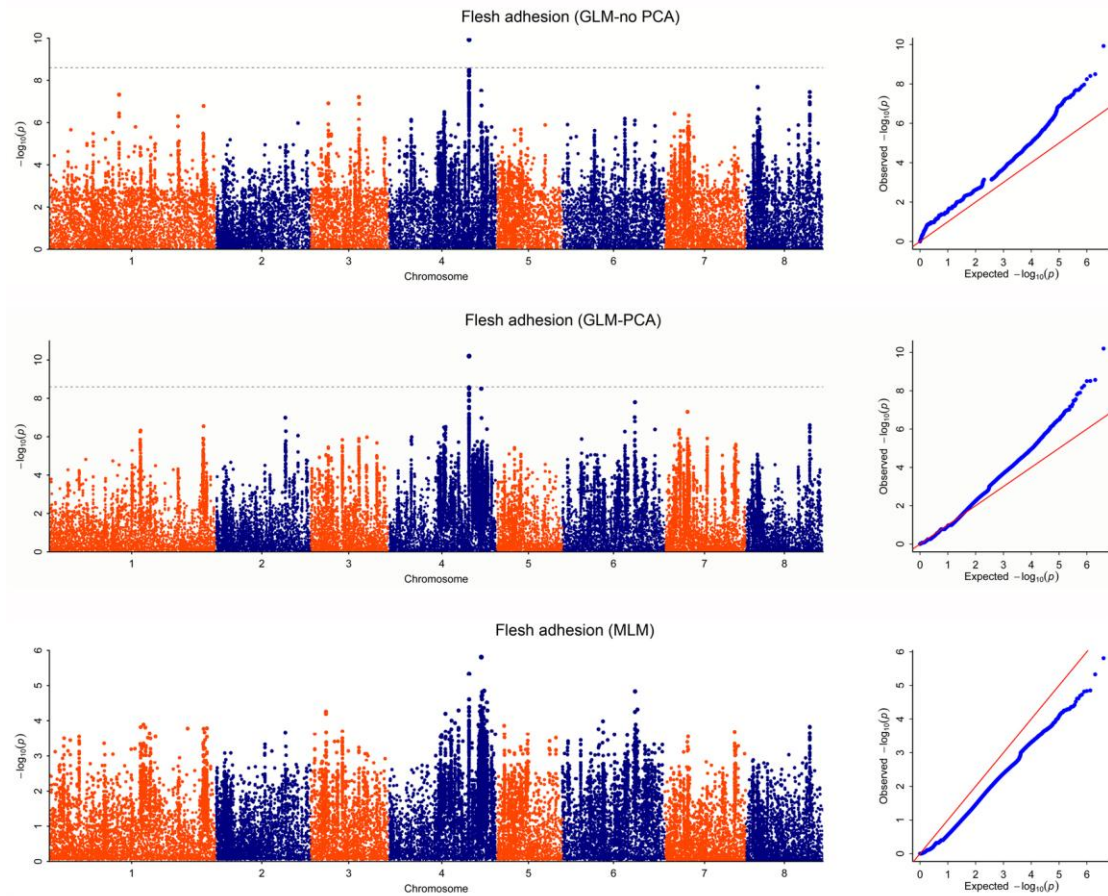

53

54 **Supplementary Figure 8: Manhattan and quantile-quantile plots for**

55 **Genome-wide association studies of fruit flesh adhesion trait in 129 peach**

56 **accessions using three analysis models.**



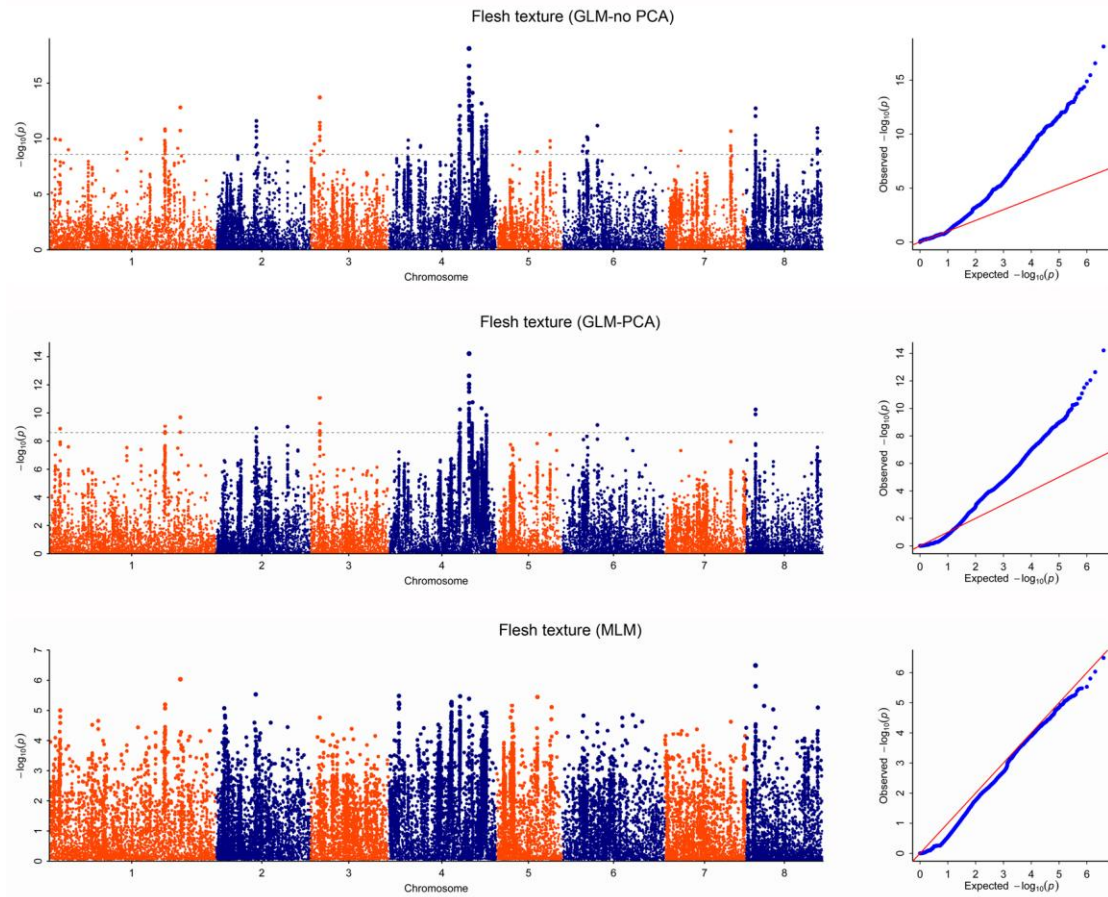

57

58 **Supplementary Figure 9: Manhattan and quantile-quantile plots for**

59 **Genome-wide association studies of fruit flesh texture trait in 129 peach**

60 **accessions using three analysis models.**

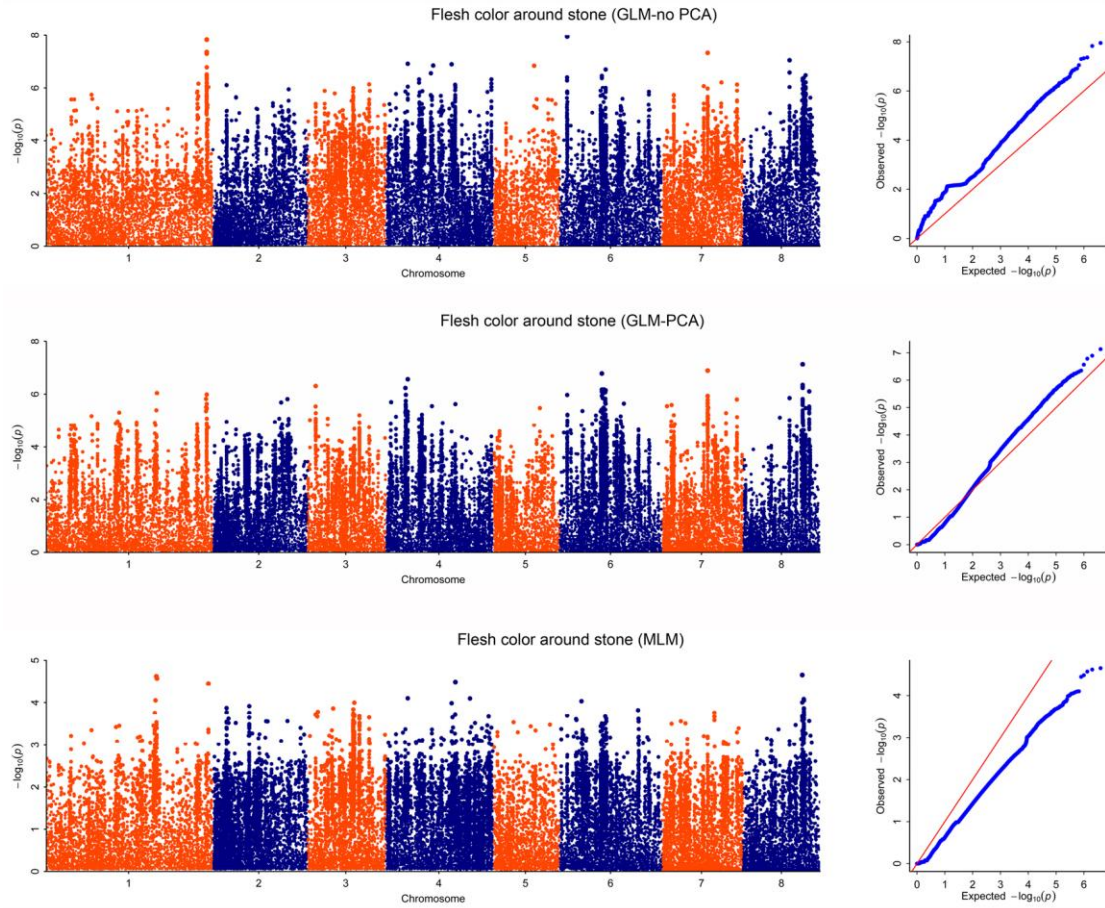

61

62 **Supplementary Figure 10: Manhattan and quantile-quantile plots for**

63 **Genome-wide association studies of flesh color around stone trait in 129 peach**

64 **accessions using three analysis models.**

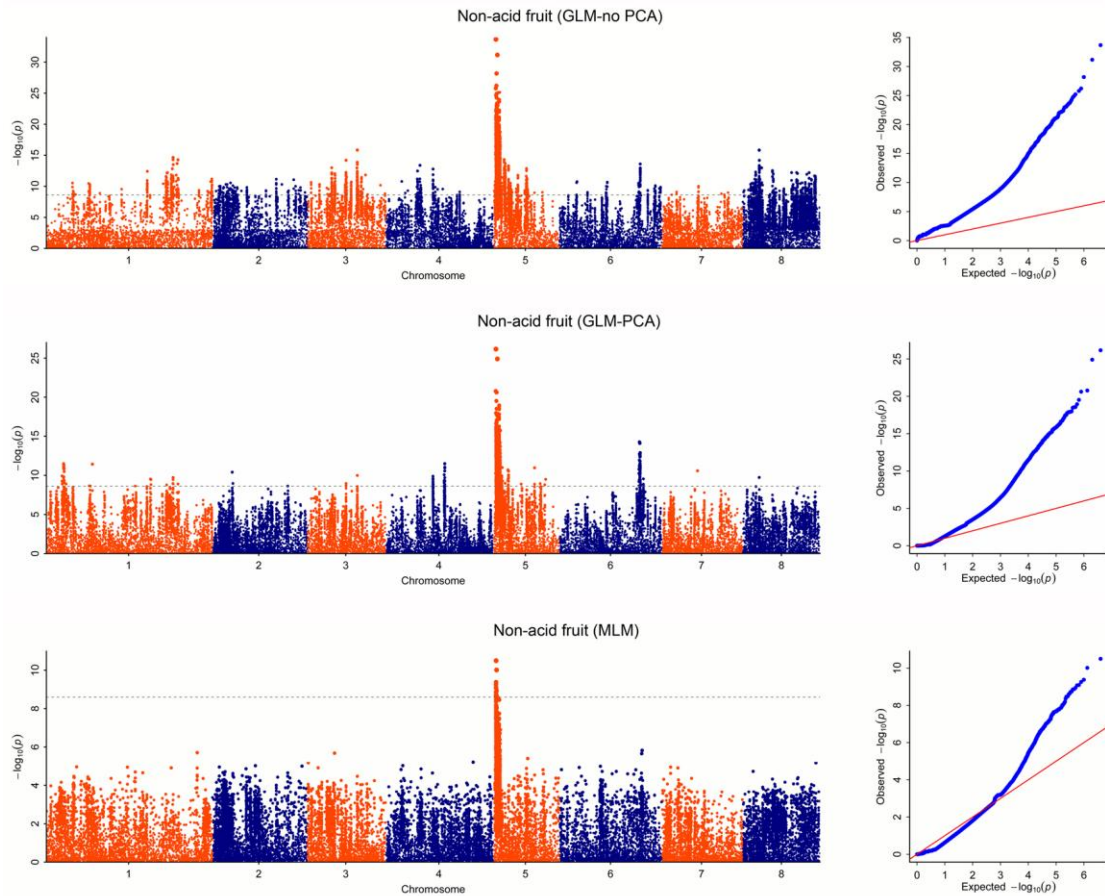

65  
 66 **Supplementary Figure 11: Manhattan and quantile-quantile plots for**  
 67 **Genome-wide association studies of non-acid fruit trait in 129 peach accessions**  
 68 **using three analysis models.**

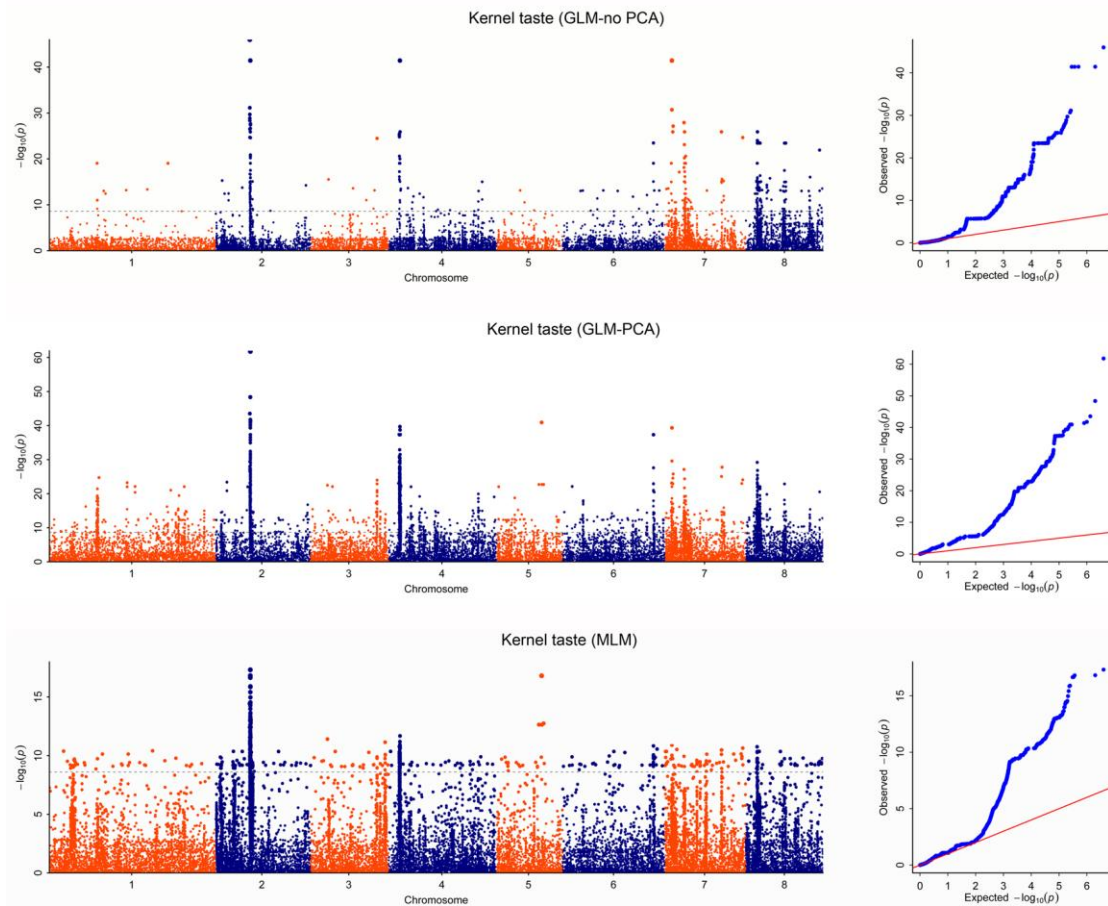

69

70 **Supplementary Figure 12: Manhattan and quantile-quantile plots for**

71 **Genome-wide association studies of kernel taste trait in 129 peach accessions**

72 **using three analysis models.**



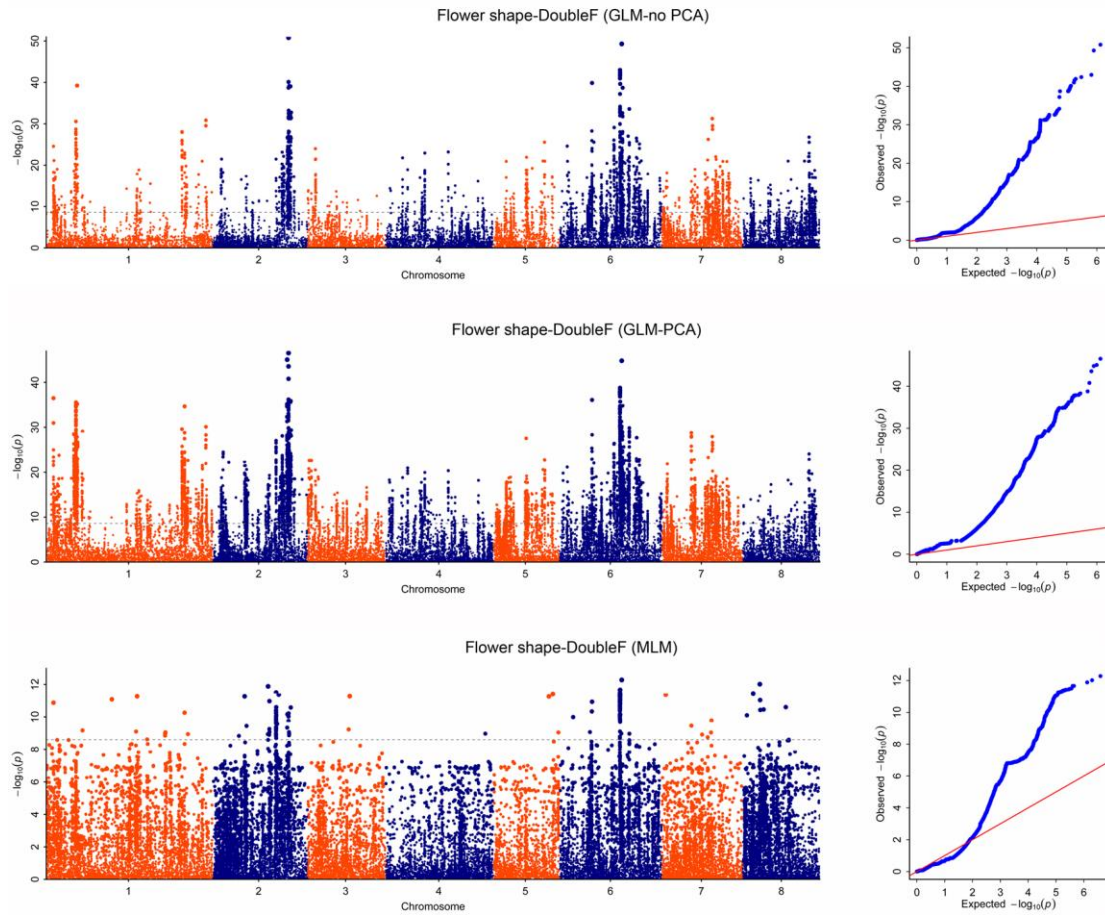

73

74 **Supplementary Figure 13: Manhattan and quantile-quantile plots for**

75 **Genome-wide association studies of flower shape-DoubleF trait in 129 peach**

76 **accessions using three analysis models.**

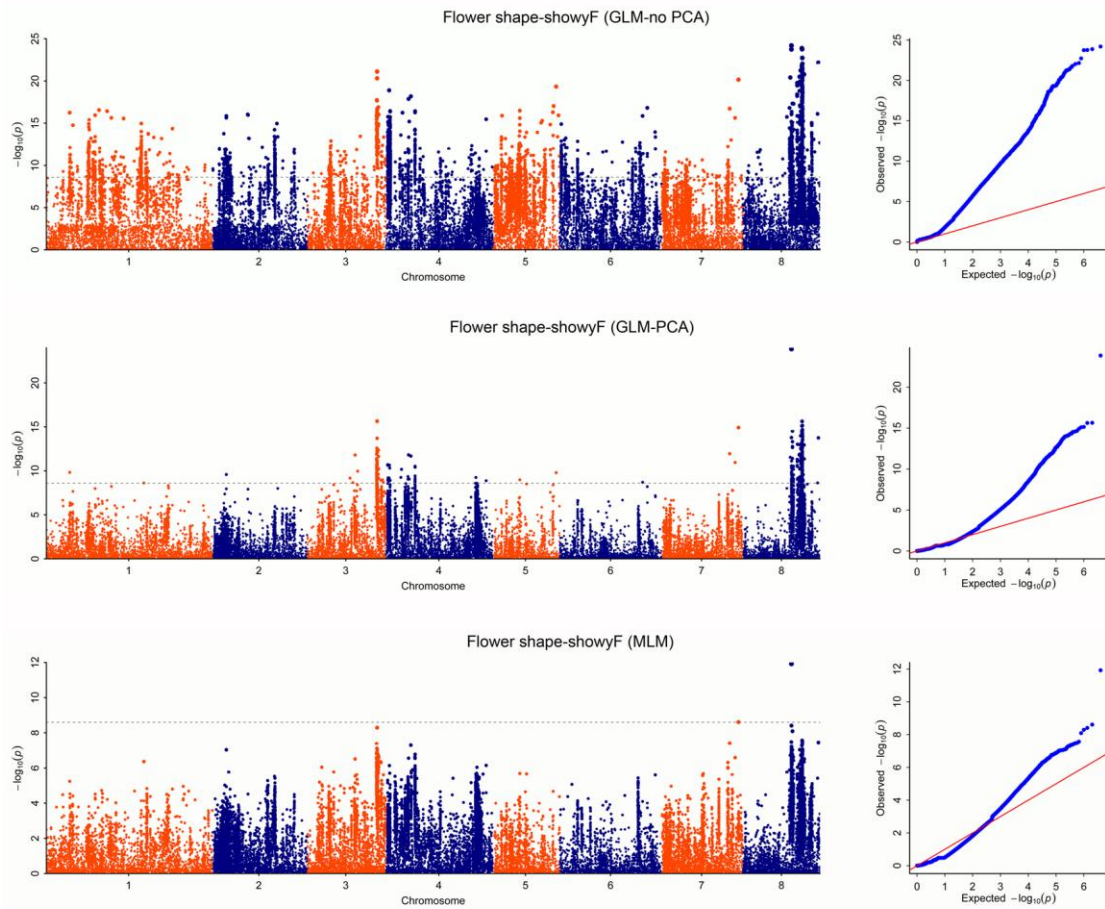

77

78 **Supplementary Figure 14: Manhattan and quantile-quantile plots for**

79 **Genome-wide association studies of flower shape-showyF trait in 129 peach**

80 **accessions using three analysis models.**

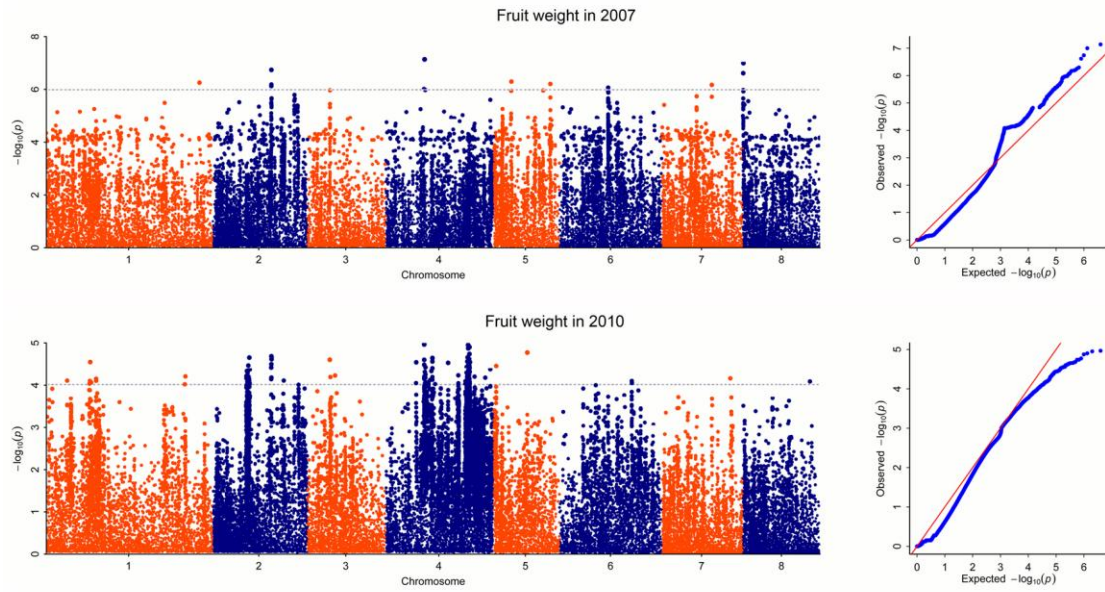

81

82 **Supplementary Figure 15: Manhattan and quantile-quantile plots for**  
 83 **Genome-wide association studies of fruit weight trait in 2007 and 2010 in 129**  
 84 **peach accessions using three analysis models.** Negative  $\log_{10}$ -transformed P values  
 85 from the genome-wide scan were plotted against SNPs position on each of the eight  
 86 chromosomes.



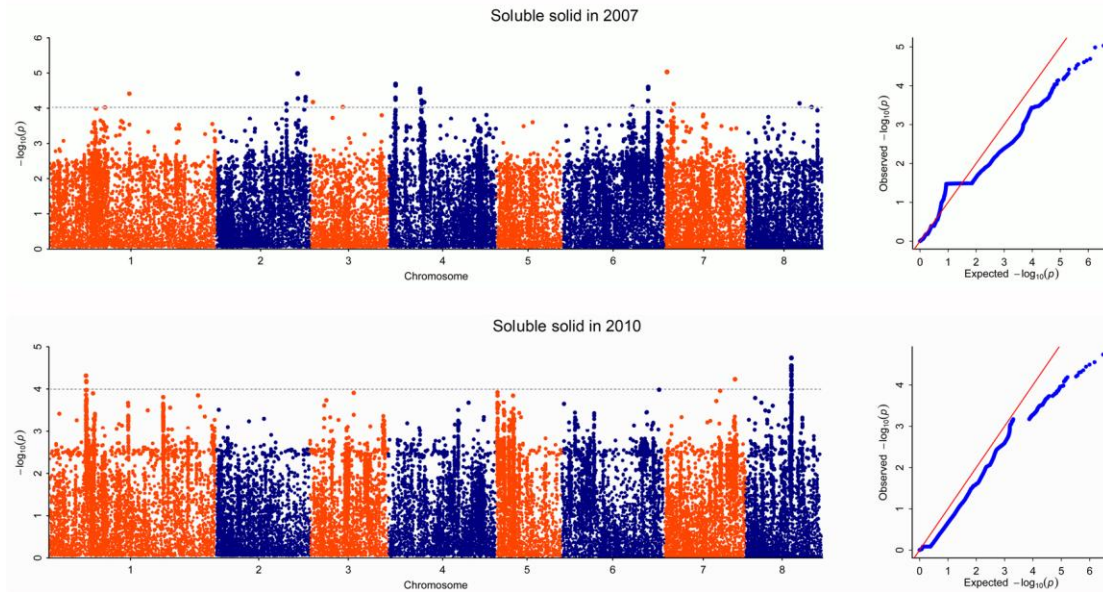

87

88 **Supplementary Figure 16: Manhattan and quantile-quantile plots for**  
 89 **Genome-wide association studies of soluble solid trait in 2007 and 2010 in 129**  
 90 **peach accessions using three analysis models.** Negative  $\log_{10}$ -transformed P values  
 91 from the genome-wide scan were plotted against SNPs position on each of the eight  
 92 chromosomes.

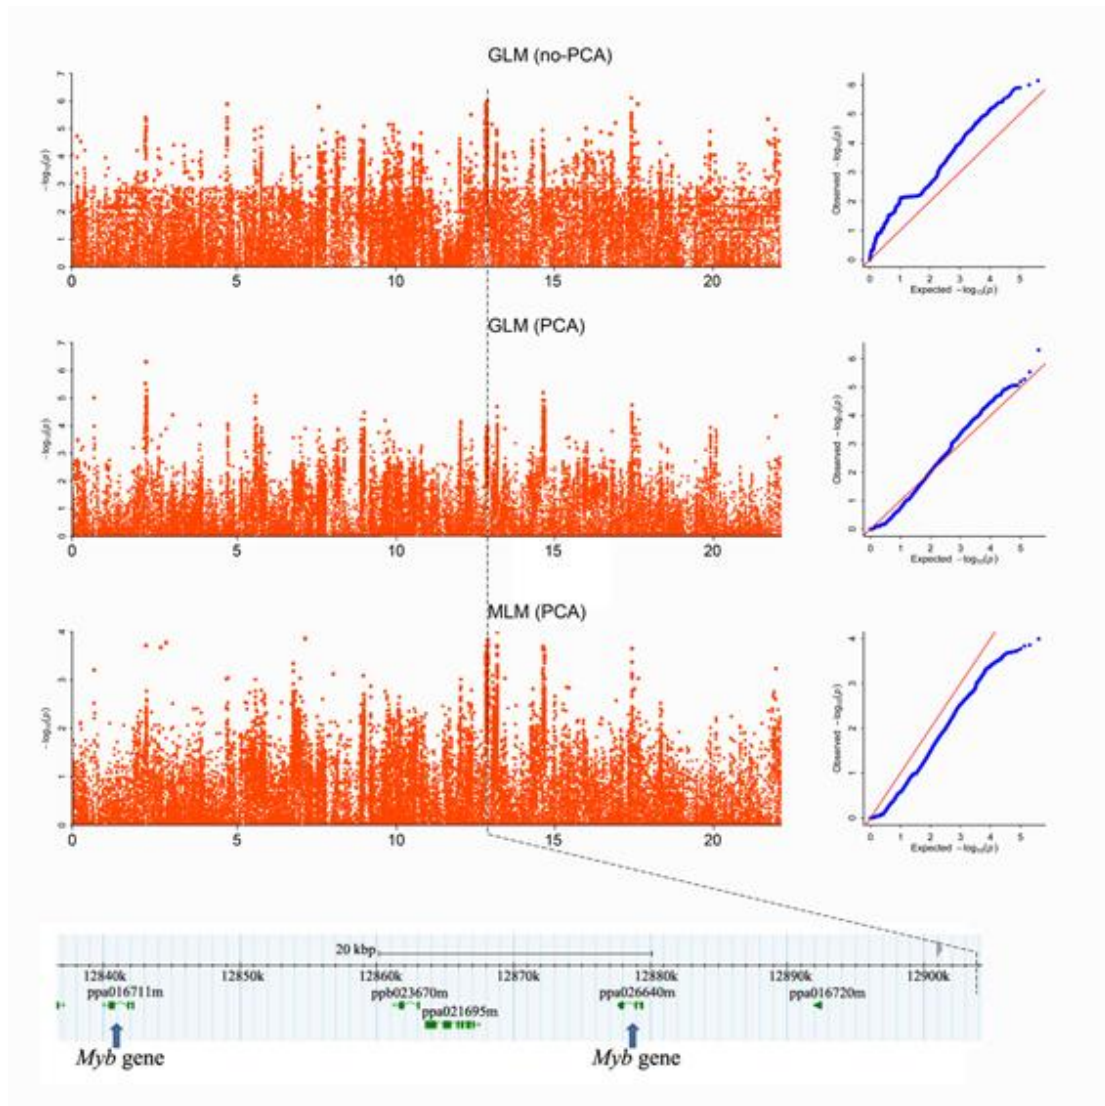

93

94 **Supplementary Figure 17: Genome-wide association study of the flesh color**  
 95 **around the stone trait in 129 peach accessions using the SNPs detected on**  
 96 **scaffold\_3.** Although the highest association signal for this trait was found in  
 97 chromosome 6 (Supplementary Fig. 10), its  $P$  value was lower than genome-wide  
 98 levels ( $-\log_{10} P = 8$ ) and this region was not reported in previous research. A SNP  
 99 association peak was also found on scaffold\_3: 12,902,851 bp, near two *MYB* genes  
 100 (*ppa016711m* and *ppa026640m*). One of these genes (*ppa016711m*) was reported by  
 101 Wang<sup>26</sup> as a key regulator of anthocyanin content in peach.

Annotated sequence in our results

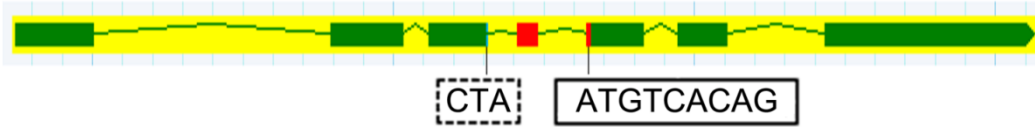

102

103

**Supplementary Figure 18: The annotated transcriptional structure of the**

104

**candidate gene *ppa003772m*.** In our study, *ppa003772m* was considered a candidate

105

gene for flat peach shape (Figure 1). After cloning the *ppa003772m* gene in flat and

106

round peach accessions, their coding frames differed from those annotated in the

107

peach genome ([www.rosaceae.org](http://www.rosaceae.org)). A new exon (shown in red) was present in the

108

area corresponding to the third intron of all sampled materials. And three bases (CTA)

109

in the tail of the original third exon (in green) were absent in the new annotated

110

sequence. In addition to this, nine new bases (ATGTCACAG) were present in the

111

head of the fifth exon of the new annotated gene. Moreover, the original annotated

112

mRNA sequence was not found in peach tissues, indicating that the previous gene

113

annotation might be incorrect.

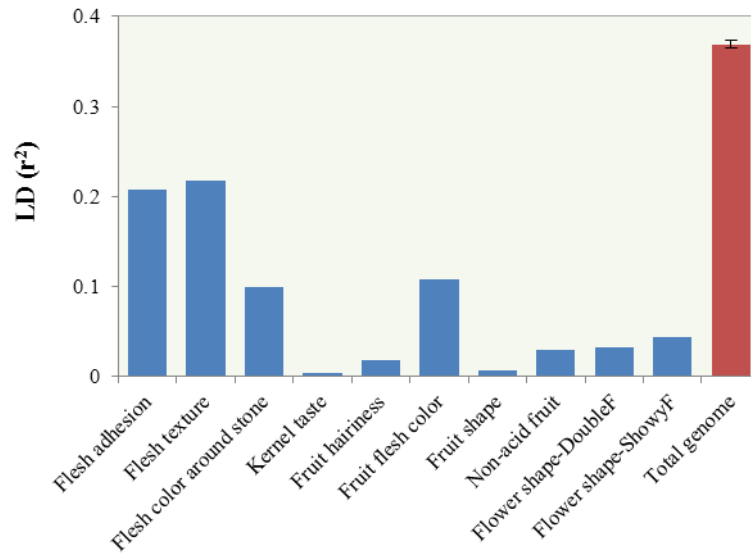

114

115 **Supplementary Figure 19: The average linkage disequilibrium (LD,  $r^2$ ) of peak**  
 116 **association signal of 10 qualitative characters with each SNP during surrounding**  
 117 **50-kb region and the average  $r^2$  in contiguous 50-kb windows across the peach**  
 118 **pseudo-chromosomes.** Peak association signals are listed in Table 1 and the LD  
 119 across the chromosomes is shown in Supplementary Figure 20. This figure shows that  
 120 the average LD of peak association signals of 10 qualitative characters with each SNP  
 121 during surrounding 50-kb region (blue columns) were lower than the average LD  
 122 across the eight peach chromosomes (red column), particularly those of kernel taste  
 123 and fruit shape. Error bars indicate s.d.

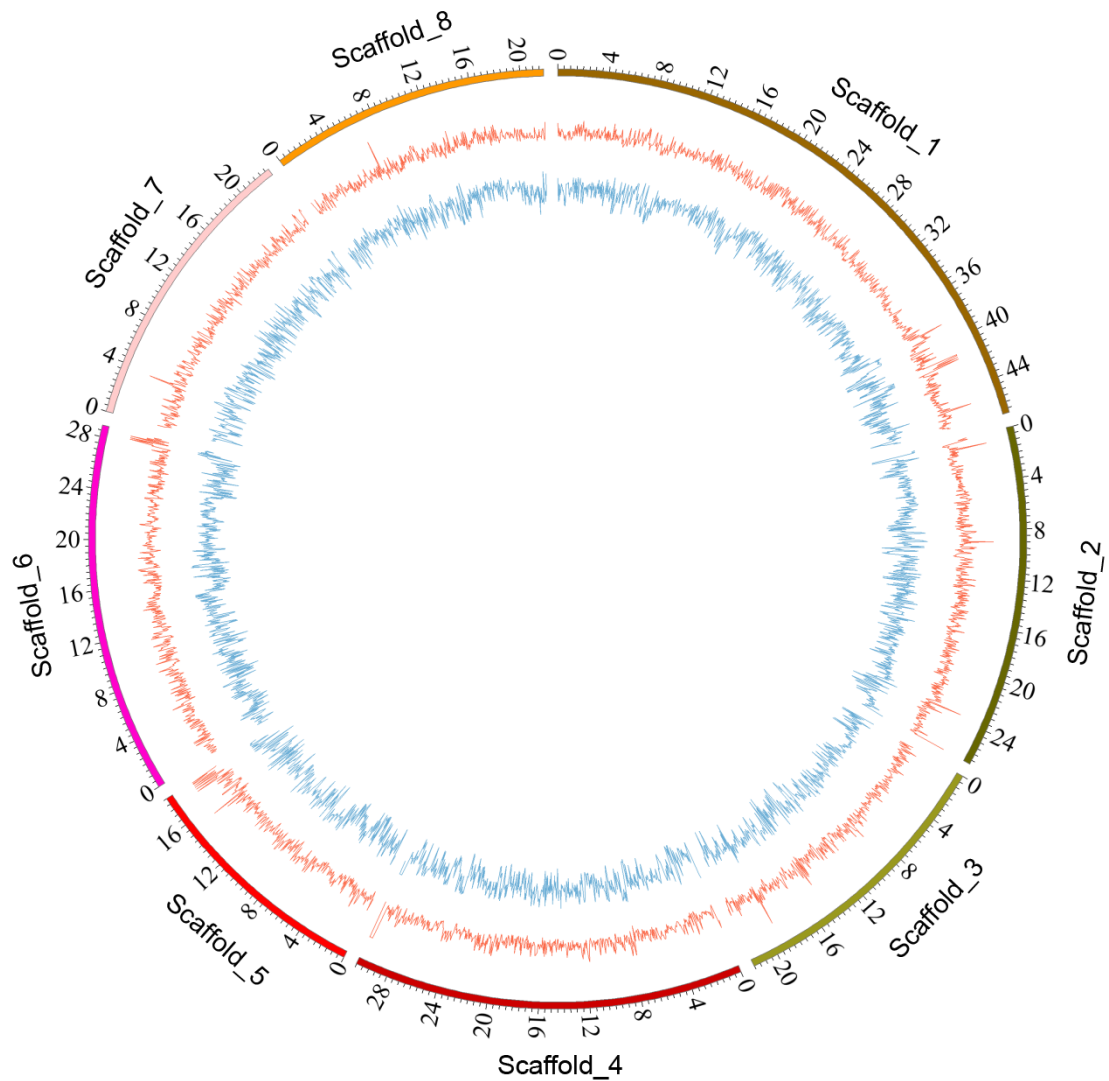

124

125 **Supplementary Figure 20: Linkage disequilibrium (LD) in contiguous 50-kb**  
 126 **windows across peach chromosomes.** The outer rings indicate individual  
 127 chromosomes and the numbers indicate physical locations in Mb.  $r^2$  values are  
 128 displayed in the inner blue circle and  $D'$  in the middle red circle.

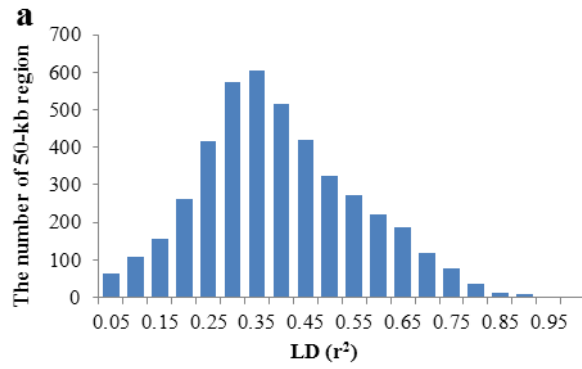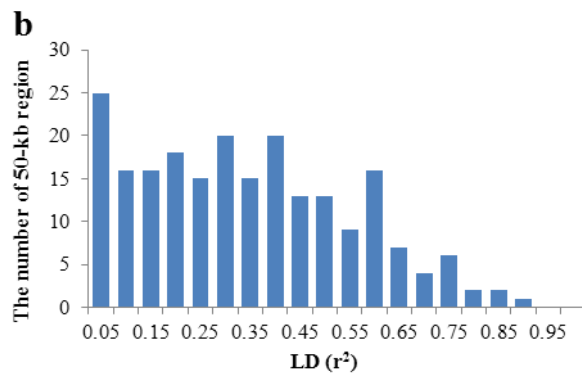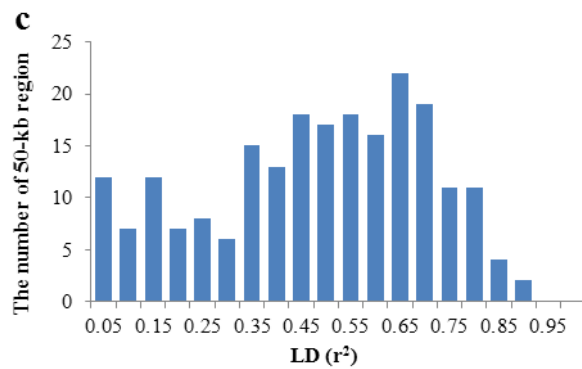

129 **Supplementary Figure 21: Distribution of a LD value ( $r^2$ ) in contiguous 50-kb**  
 130 **windows across total (a), domestication (b), and improvement selection (c)**  
 131 **regions in peach chromosomes.**

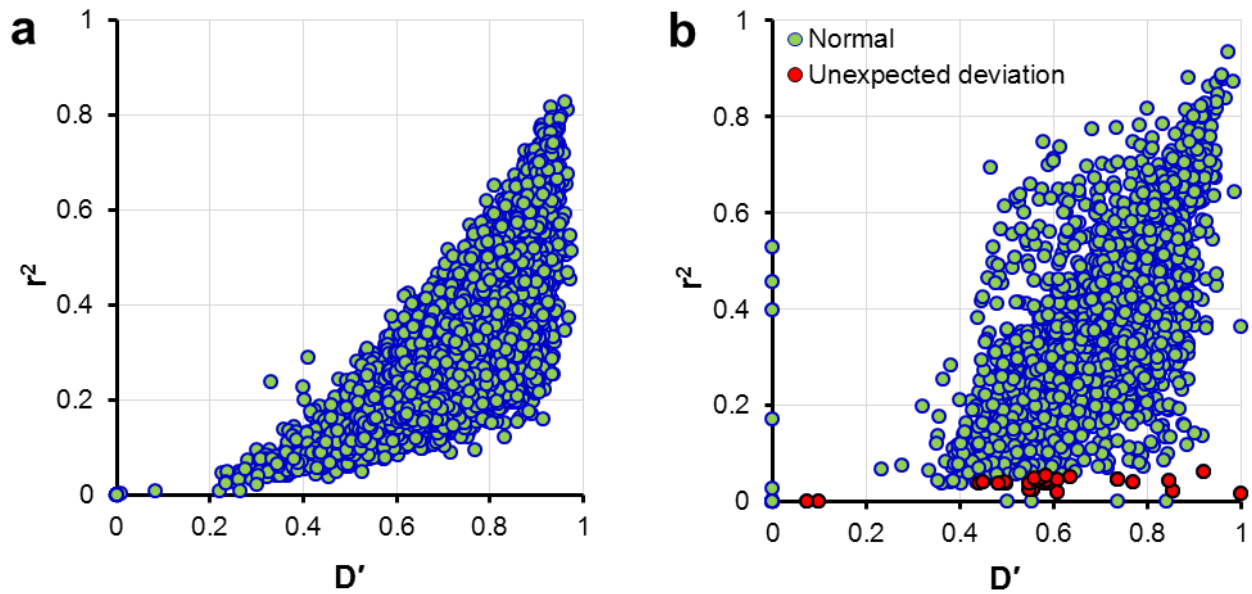

132 **Supplementary Figure 22: The relationship between two parameters ( $r^2$  and  $D'$ )**  
 133 **for estimating linkage disequilibrium (LD) in contiguous 50-kb genomic windows**  
 134 **in soybean and peach.** LD values ( $D'$  and  $r^2$ ) vary from 0 to 1 lies along the X and Y  
 135 axis. (a) Due to the lack of  $D'$  values from soybean,  $r^2$  values presented in this plot  
 136 were recalculated rely on data from previous study<sup>43</sup> and the relationships between  $D'$   
 137 and  $r^2$  are shown as light green dots. In general,  $r^2$  was lower than  $D'$  in each given  
 138 interval. (b) Regions with low  $r^2$  and high  $D'$  in peach were considered as normal and  
 139 are also shown as light green dots, whereas regions with extraordinary low  $r^2$  are  
 140 shown as red dots. These regions are under domestication or improved selection.



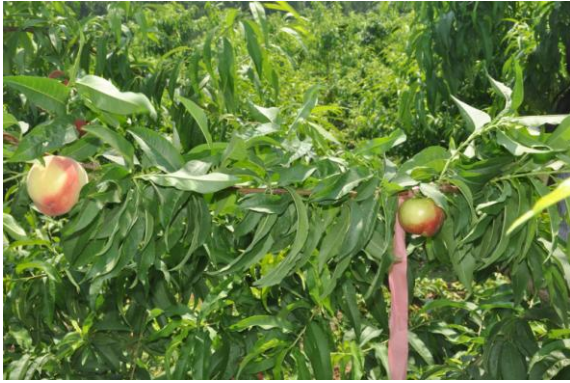

Peach burst into Nectarine

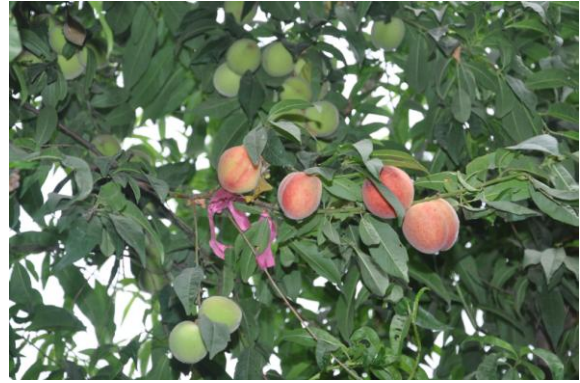

Late mature burst into early mature fruit

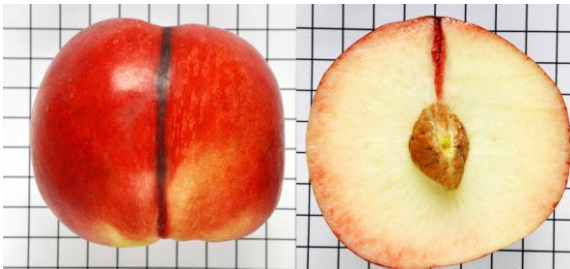

White flesh burst into red flesh in suture line of fruit

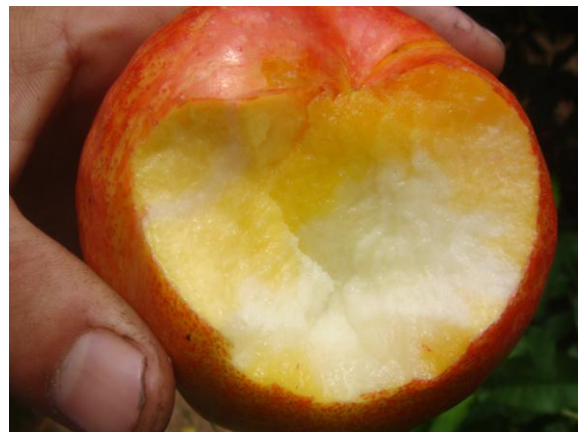

White flesh burst into yellow flesh

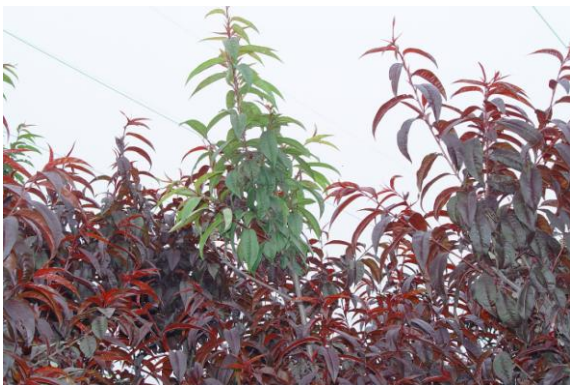

Red leaf burst into green leaf

141 **Supplementary Figure 23: Peach mutation.**

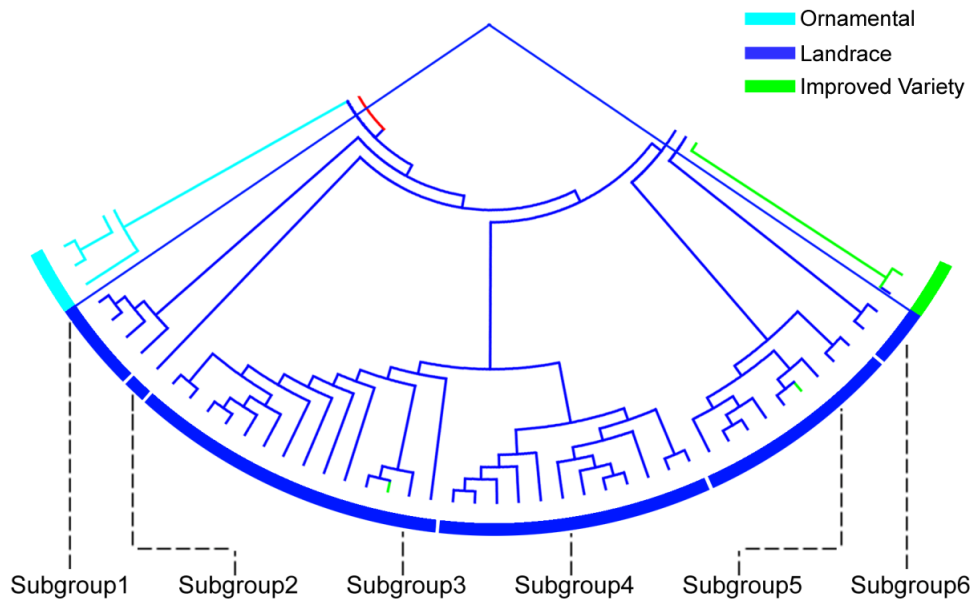

142

143 **Supplementary Figure 24: Edible landraces subgroups as defined by the**  
 144 **phylogenetic analysis based on total SNPs.** This is an enlarged section of  
 145 Supplementary Fig. 3a, only focusing on the edible landrace group. According to the  
 146 phylogenetic tree, the edible landrace group (blue lines in the above figure) can be  
 147 divided into six subgroups. Ornamental (cyan lines) and Improved varieties (green  
 148 line) are not considered in this figure.

149 **Supplementary Table 1: Peach samples added in this study compared to a**  
 150 **previous one<sup>7</sup>.**

| Name                                   | Scientific name                     | Description and origin                       |
|----------------------------------------|-------------------------------------|----------------------------------------------|
| <b>07-1-11</b>                         | <i>P. persica</i> (L.) Batsch.      | Improved variety from crosses, Henan, PRC    |
| <b>07-2-24</b>                         | <i>P. persica</i> (L.) Batsch.      | Improved variety from crosses, Henan, PRC    |
| <b>07-4-33</b>                         | <i>P. persica</i> (L.) Batsch.      | Improved variety from crosses, Henan, PRC    |
| <b>08-X-77</b>                         | <i>P. persica</i> (L.) Batsch.      | Improved variety from crosses, Henan, PRC    |
| <b>09-12 west-5</b>                    | <i>P. persica</i> (L.) Batsch.      | Improved variety from crosses, Henan, PRC    |
| <b>Bailey</b>                          | <i>P. persica</i> (L.) Batsch.      | Improved variety from crosses, USA           |
| <b>Da Guo Hei Tao</b>                  | <i>P. persica</i> (L.) Batsch.      | Landrace, edible, Shandong, PRC              |
| <b>Da Lian 4-35</b>                    | <i>P. persica</i> (L.) Batsch.      | Improved variety from crosses, Liaoning, PRC |
| <b>Dan Bei Ti</b>                      | <i>P. persica</i> (L.) Batsch.      | Improved variety from mutation, Henan, PRC   |
| <b>Elberta (Non-showy flower)</b>      | <i>P. persica</i> (L.) Batsch.      | Improved variety from crosses, USA           |
| <b>Fen Shou Xing</b>                   | <i>P. persica</i> (L.) Batsch.      | Landrace, Ornamental, Hebei, PRC             |
| <b>Harrow Blood</b>                    | <i>P. persica</i> (L.) Batsch.      | Improved variety from crosses, Canada        |
| <b>Hong Hua Bi Tao</b>                 | <i>P. persica</i> (L.) Batsch.      | Landrace, edible, Beijing, PRC               |
| <b>Hong Shan Hu</b>                    | <i>P. persica</i> (L.) Batsch.      | Improved variety from crosses, Beijing, PRC  |
| <b>Hong Ye Tao</b>                     | <i>P. persica</i> (L.) Batsch.      | Landrace, edible, Henan, PRC                 |
| <b>Hong Ye Tao Ya Bian</b>             | <i>P. persica</i> (L.) Batsch.      | Improved variety from mutation, Henan, PRC   |
| <b>Huang Jin Pan Tao</b>               | <i>P. persica</i> (L.) Batsch.      | Landrace, edible, Shanghai, PRC              |
| <b>Legrand</b>                         | <i>P. persica</i> (L.) Batsch.      | Improved variety from crosses, USA           |
| <b>Mai Huang Pan Tao</b>               | <i>P. persica</i> (L.) Batsch.      | Improved variety from crosses, Henan, PRC    |
| <b>Mao Tao (2-1-55)</b>                | <i>P. persica</i> (L.) Batsch.      | Improved variety from mutation, Henan, PRC   |
| <b>Maria Serena</b>                    | <i>P. persica</i> (L.) Batsch.      | Improved variety from crosses, Italy         |
| <b>NJC77</b>                           | <i>P. persica</i> (L.) Batsch.      | Improved variety from crosses, USA           |
| <b>Nonpareil</b>                       | <i>P. communis</i> (L.) Fritsch.    | Wild, USA                                    |
| <b>Phillips</b>                        | <i>P. persica</i> (L.) Batsch.      | Improved variety from crosses, USA           |
| <b>Ping Ding You Pan Tao</b>           | <i>P. persica</i> (L.) Batsch.      | Improved variety from crosses, Henan, PRC    |
| <b>Redhaven</b>                        | <i>P. persica</i> (L.) Batsch.      | Improved variety from crosses, USA           |
| <b>Rui Guang 3</b>                     | <i>P. persica</i> (L.) Batsch.      | Improved variety from crosses, Beijing, PRC  |
| <b>Shu Guang Hong Xian Ya Bian</b>     | <i>P. persica</i> (L.) Batsch.      | Improved variety from mutation, Henan, PRC   |
| <b>Wu Han 2</b>                        | <i>P. persica</i> (L.) Batsch.      | Improved variety from crosses, Shaanxi, PRC  |
| <b>Xi Kang Bian Tao 1</b>              | <i>P. tangutica</i> (L.) Batal.     | Wild, Sichuan, PRC                           |
| <b>Xin Jiang Pan Tao</b>               | <i>P. ferganensis</i> Kost.et Riab. | Landrace, edible, Sinkiang, PRC              |
| <b>Yang Zhou 3</b>                     | <i>P. persica</i> (L.) Batsch.      | Improved variety from crosses, Jiangsu, PRC  |
| <b>Ying Zui Tao</b>                    | <i>P. persica</i> (L.) Batsch.      | Landrace, edible, Anhui, PRC                 |
| <b>Zao Huang Pan Tao</b>               | <i>P. persica</i> (L.) Batsch.      | Improved variety from crosses, Henan, PRC    |
| <b>Zao Shu Xia Ye Tao</b>              | <i>P. persica</i> (L.) Batsch.      | Improved variety from mutation, Henan, PRC   |
| <b>Zhong You Pan Tao 2</b>             | <i>P. persica</i> (L.) Batsch.      | Improved variety from crosses, Henan, PRC    |
| <b>Zhong You Pan Tao 4</b>             | <i>P. persica</i> (L.) Batsch.      | Improved variety from crosses, Henan, PRC    |
| <b>Zhong You Tao 4</b>                 | <i>P. persica</i> (L.) Batsch.      | Improved variety from crosses, Henan, PRC    |
| <b>Zhong You Tao 4 Zao Shu Ya Bian</b> | <i>P. persica</i> (L.) Batsch.      | Improved variety from mutation, Anhui, PRC   |

|                                                     |                                |                                              |
|-----------------------------------------------------|--------------------------------|----------------------------------------------|
| <b>Zhong You Tao 5</b>                              | <i>P. persica</i> (L.) Batsch. | Improved variety from crosses, Henan, PRC    |
| <b>Zhong You Tao 5 Zao Shu Ya<br/>Bian</b>          | <i>P. persica</i> (L.) Batsch. | Improved variety from mutation, Guangxi, PRC |
| <b>Zhong You Tao 9</b>                              | <i>P. persica</i> (L.) Batsch. | Improved variety from crosses, Henan, PRC    |
| <b>Zhong You Tao 9 Hei Xian Bai<br/>Rou Ya Bian</b> | <i>P. persica</i> (L.) Batsch. | Improved variety from mutation, Anhui, PRC   |
| <b>Zhong You Tao 9 Huang Rou Ya<br/>Bian</b>        | <i>P. persica</i> (L.) Batsch. | Improved variety from mutation, Anhui, PRC   |
| <b>Zhong You Tao 9 Wang Shu Ya<br/>Bian</b>         | <i>P. persica</i> (L.) Batsch. | Improved variety from mutation, Henan, PRC   |

151

152 **Supplementary Table 2: Agronomic traits of peach samples used in this study.**

| Name                              | Fruit hairiness | Fruit shape | Fruit flesh color | Flesh adhesion | Flesh texture | Flesh color around stone | Non-acid fruit | Flower shape-DoubleF | Flower shape-ShowyF | Kernel taste | Fruit weight in 2007 (g) | Fruit weight in 2010 (g) | Soluble solid in 2007 (%) | Soluble solid in 2010 (%) |
|-----------------------------------|-----------------|-------------|-------------------|----------------|---------------|--------------------------|----------------|----------------------|---------------------|--------------|--------------------------|--------------------------|---------------------------|---------------------------|
| <b>07-1-11</b>                    | No              | Round       | White             | Clingstone     | Melting       | Yes                      | No             | Single               | NA                  | Bitter       | NA                       | 130                      | NA                        | 13                        |
| <b>07-2-24</b>                    | Yes             | Round       | White             | Clingstone     | Melting       | Yes                      | Yes            | Single               | Showy               | Bitter       | NA                       | 170                      | NA                        | 12                        |
| <b>07-4-33</b>                    | NA              | NA          | NA                | NA             | NA            | NA                       | NA             | NA                   | NA                  | NA           | NA                       | NA                       | NA                        | NA                        |
| <b>08-X-77</b>                    | NA              | NA          | NA                | NA             | NA            | NA                       | NA             | Single               | NA                  | Bitter       | NA                       | NA                       | NA                        | NA                        |
| <b>09-12 west-5</b>               | Yes             | Flat        | White             | Clingstone     | Melting       | NA                       | No             | Single               | NA                  | Bitter       | NA                       | 110                      | NA                        | NA                        |
| <b>Bailey</b>                     | Yes             | Round       | White             | Freestone      | Melting       | Yes                      | No             | Single               | Showy               | Bitter       | 65.2                     | 79                       | 11                        | NA                        |
| <b>Da Guo Hei Tao</b>             | Yes             | Round       | White             | Freestone      | Melting       | Yes                      | No             | Single               | Showy               | Bitter       | 187                      | 146                      | 12                        | NA                        |
| <b>Da Lian 4-35</b>               | Yes             | Flat        | Yellow            | Freestone      | Melting       | No                       | Yes            | Single               | Showy               | Bitter       | 100                      | 128.9                    | 11                        | NA                        |
| <b>Dan Bei Ti</b>                 | No              | Round       | Yellow            | Clingstone     | Melting       | NA                       | NA             | Single               | Non-showy           | NA           | NA                       | NA                       | NA                        | NA                        |
| <b>Elberta (Non-showy flower)</b> | Yes             | Round       | Yellow            | Freestone      | Melting       | Yes                      | No             | Single               | Non-showy           | Bitter       | 198                      | 142.5                    | 10                        | 8                         |
| <b>Fen Shou Xing</b>              | Yes             | Round       | White             | Freestone      | Melting       | Yes                      | No             | Single               | Showy               | Bitter       | 79.4                     | 89                       | 7                         | NA                        |
| <b>Harrow Blood</b>               | Yes             | Round       | White             | Freestone      | Melting       | Yes                      | No             | Single               | Showy               | Bitter       | NA                       | 47                       | NA                        | 18                        |
| <b>Hong Hua Bi Tao</b>            | Yes             | Round       | White             | Freestone      | Melting       | No                       | No             | Multiple             | Showy               | Bitter       | 25                       | NA                       | 11                        | NA                        |
| <b>Hong Shan Hu</b>               | No              | Round       | White             | Clingstone     | Melting       | No                       | Yes            | Single               | Non-showy           | Bitter       | 148                      | 151                      | 13                        | NA                        |
| <b>Hong Ye Tao</b>                | Yes             | Round       | White             | NA             | Melting       | No                       | No             | Multiple             | Showy               | Bitter       | 81.9                     | 76                       | 14                        | NA                        |
| <b>Hong Ye Tao Ya Bian</b>        | Yes             | Round       | White             | NA             | Melting       | No                       | No             | Multiple             | Showy               | Bitter       | NA                       | 96                       | 10                        | NA                        |
| <b>Huang Jin Pan Tao</b>          | Yes             | Flat        | Yellow            | Clingstone     | Melting       | Yes                      | Yes            | Single               | Showy               | Bitter       | 112                      | 97.7                     | 12.5                      | 11.5                      |
| <b>Legrand</b>                    | No              | Round       | Yellow            | Freestone      | Melting       | Yes                      | No             | Single               | Showy               | Sweet        | 151                      | 126.7                    | 11.5                      | 11                        |
| <b>Mai Huang Pan Tao</b>          | Yes             | Flat        | Yellow            | Clingstone     | Melting       | No                       | Yes            | Single               | Showy               | Bitter       | 89.6                     | 70                       | NA                        | 11                        |
| <b>Mao Tao (2-1-55)</b>           | Yes             | Round       | Yellow            | Clingstone     | Melting       | Yes                      | Yes            | Single               | Showy               | Bitter       | 78                       | NA                       | 11                        | NA                        |
| <b>Maria Serena</b>               | Yes             | Round       | Yellow            | Clingstone     | Non-melting   | No                       | No             | Single               | Showy               | Bitter       | 130                      | 113.7                    | 7.6                       | 7                         |

|                              |     |       |        |            |             |     |     |        |           |        |       |       |      |      |
|------------------------------|-----|-------|--------|------------|-------------|-----|-----|--------|-----------|--------|-------|-------|------|------|
| <b>NJC77</b>                 | Yes | Round | Yellow | Clingstone | Non-melting | No  | No  | Single | Non-showy | Bitter | 157.3 | 112.3 | 12.6 | 10   |
| <b>Nonpareil</b>             | Yes | Round | NA     | Freestone  | Melting     | NA  | NA  | NA     | Showy     | Sweet  | NA    | NA    | NA   | NA   |
| <b>Phillips</b>              | Yes | Round | Yellow | Clingstone | Non-melting | No  | No  | Single | Non-showy | Bitter | 135   | 116.5 | 12.9 | 12.5 |
| <b>Ping Ding You Pan Tao</b> | No  | Flat  | Yellow | Freestone  | Melting     | No  | No  | Single | Showy     | Bitter | 82    | 78.9  | 10   | NA   |
| <b>Redhaven</b>              | Yes | Round | Yellow | Freestone  | Melting     | Yes | No  | Single | Non-showy | Bitter | 124.1 | 130   | 10   | 9    |
| <b>Rui Guang 3</b>           | No  | Round | White  | Freestone  | Melting     | Yes | Yes | Single | Non-showy | Bitter | 123.8 | 144.5 | 12   | 7    |
| <b>Shu Guang Hong Xian</b>   | No  | Round | Yellow | NA         | Melting     | Yes | Yes | Single | Showy     | Bitter | NA    | 102   | 13.5 | NA   |
| <b>Ya Bian</b>               |     |       |        |            |             |     |     |        |           |        |       |       |      |      |
| <b>Wu Han 2</b>              | Yes | Round | White  | Freestone  | Melting     | Yes | Yes | Single | Showy     | Bitter | 96    | 90    | 12.6 | 11   |
| <b>Xi Kang Bian Tao 1</b>    | Yes | Round | White  | Freestone  | Melting     | NA  | NA  | NA     | Showy     | Bitter | NA    | 5     | NA   | NA   |
| <b>Xin Jiang Pan Tao</b>     | Yes | Flat  | White  | Freestone  | Melting     | No  | No  | Single | Showy     | Bitter | 52    | NA    | 13   | NA   |
| <b>Yang Zhou 3</b>           | Yes | Round | White  | Freestone  | Melting     | No  | No  | Single | Showy     | Bitter | 150   | 80    | 12.6 | 10   |
| <b>Ying Zui</b>              | Yes | Round | White  | Clingstone | Non-melting | Yes | No  | Single | Showy     | Bitter | 257   | 160   | 11   | 10   |
| <b>Zao Huang Pan Tao</b>     | Yes | Flat  | Yellow | Freestone  | Melting     | No  | Yes | Single | Showy     | Bitter | 116.7 | 88    | NA   | 11   |
| <b>Zao Shu Xia Ye Tao</b>    | NA  | NA    | NA     | NA         | NA          | NA  | NA  | Single | NA        | NA     | NA    | NA    | NA   | NA   |
| <b>Zhong You Pan Tao 2</b>   | No  | Flat  | Yellow | Clingstone | Melting     | No  | Yes | Single | Non-showy | Bitter | 80    | 83.5  | 18   | NA   |
| <b>Zhong You Pan Tao 4</b>   | No  | Flat  | Yellow | Clingstone | Non-melting | Yes | Yes | Single | Non-showy | Bitter | 120   | NA    | 18   | NA   |
| <b>Zhong You Tao 4</b>       | No  | Round | Yellow | Clingstone | Melting     | Yes | Yes | Single | Non-showy | Bitter | NA    | 150   | NA   | 11   |
| <b>Zhong You Tao 4 Zao</b>   | No  | Round | Yellow | NA         | Melting     | Yes | Yes | Single | Non-showy | Bitter | NA    | 150   | NA   | 11   |
| <b>Shu Ya Bian</b>           |     |       |        |            |             |     |     |        |           |        |       |       |      |      |
| <b>Zhong You Tao 5</b>       | No  | Round | White  | Clingstone | Melting     | No  | Yes | Single | Non-showy | Bitter | 110.1 | 150   | NA   | 8    |
| <b>Zhong You Tao 5 Zao</b>   | No  | Round | White  | NA         | Melting     | No  | Yes | Single | Non-showy | Bitter | 133   | 125.1 | 10   | NA   |
| <b>Shu Ya Bian</b>           |     |       |        |            |             |     |     |        |           |        |       |       |      |      |
| <b>Zhong You Tao 9</b>       | No  | Round | White  | Clingstone | Melting     | No  | Yes | Single | Non-showy | Bitter | 143.1 | 161   | 10   | NA   |
| <b>Zhong You Tao 9 Hei</b>   | No  | Round | White  | NA         | Melting     | Yes | Yes | Single | Non-showy | Bitter | NA    | 216   | NA   | 15   |
| <b>Xian Bai Rou Ya Bian</b>  |     |       |        |            |             |     |     |        |           |        |       |       |      |      |

|                             |    |       |        |    |         |    |     |        |           |        |    |     |    |    |
|-----------------------------|----|-------|--------|----|---------|----|-----|--------|-----------|--------|----|-----|----|----|
| <b>Zhong You Tao 9</b>      | No | Round | Yellow | NA | Melting | NA | Yes | Single | Non-showy | NA     | NA | 161 | NA | 10 |
| <b>Huang Rou Ya Bian</b>    |    |       |        |    |         |    |     |        |           |        |    |     |    |    |
| <b>Zhong You Tao 9 Wang</b> | No | Round | White  | NA | Melting | No | Yes | Single | Non-showy | Bitter | NA | 161 | NA | 10 |
| <b>Shu Ya Bian</b>          |    |       |        |    |         |    |     |        |           |        |    |     |    |    |

153 NA means the data is missing.



154 **Supplementary Table 3: Geographic origin of the edible landraces and the**  
 155 **coverage, mean depth, and heterozygosity rate of all samples.**

| Name                       | Coverage (%) | Mean depth (x) | Missing rate (%) | Heterozygosity rate [before imputed] (%) | Missing rate [imputed] (%) | Heterozygosity rate [imputed] (%) | The geographic region of the edible landraces |
|----------------------------|--------------|----------------|------------------|------------------------------------------|----------------------------|-----------------------------------|-----------------------------------------------|
| 2007-1-11                  | 96.96        | 7.77           | 1.7              | 6.45                                     | 9.08                       | 2.63                              |                                               |
| 2007-2-24                  | 95.27        | 5.48           | 2.93             | 5.37                                     | 8                          | 2.63                              |                                               |
| 07-4-33                    | 95.21        | 5.23           | 3.75             | 4.91                                     | 7.54                       | 2.63                              |                                               |
| 08-X-77                    | 96.53        | 7.01           | 1.85             | 6.74                                     | 9.57                       | 2.83                              |                                               |
| 09-12 west-5               | 96.07        | 6.21           | 2.53             | 6.95                                     | 10.16                      | 3.21                              |                                               |
| Bai Gen Gan Su Tao         | Ref. 7       | Ref. 7         | 18.75            | 1.05                                     | 2.76                       | 1.7                               |                                               |
| Bai Hua                    | Ref. 7       | Ref. 7         | 19.67            | 1.81                                     | 4.65                       | 2.84                              | MLCJ                                          |
| Bai Hua Shan Bi Tao        | Ref. 7       | Ref. 7         | 20.67            | 8.43                                     | 22.32                      | 13.89                             |                                               |
| Bai Hua Shan Tao           | Ref. 7       | Ref. 7         | 16.07            | 4.79                                     | 9.23                       | 4.45                              |                                               |
| Bai Shu 55 Bian Yi         | Ref. 7       | Ref. 7         | 15.78            | 2.06                                     | 4.99                       | 2.93                              |                                               |
| Bai Wu 8                   | Ref. 7       | Ref. 7         | 17.02            | 2.93                                     | 7.69                       | 4.76                              |                                               |
| Bailey                     | 94.9         | 5.41           | 4.71             | 3.63                                     | 5.7                        | 2.07                              |                                               |
| Bi Nan I                   | Ref. 7       | Ref. 7         | 10.63            | 0.58                                     | 1.02                       | 0.43                              | NWC                                           |
| Bian Tao                   | Ref. 7       | Ref. 7         | 16.11            | 2.66                                     | 6.53                       | 3.87                              | NC                                            |
| Chinese Cling              | Ref. 7       | Ref. 7         | 17.69            | 2.28                                     | 5.7                        | 3.41                              | MLCJ                                          |
| Chong Ban Xiao Hua Xing    | Ref. 7       | Ref. 7         | 19.62            | 2.02                                     | 5.48                       | 3.46                              |                                               |
| Da Guo Hei Tao             | 93.64        | 6.36           | 3.48             | 1.03                                     | 1.66                       | 0.63                              | NC                                            |
| Da Hong Pao                | Ref. 7       | Ref. 7         | 18.75            | 2.36                                     | 6.25                       | 3.89                              | MLCJ                                          |
| Da Lian 4-35               | 95.42        | 6.99           | 2.56             | 4.14                                     | 5.99                       | 1.85                              |                                               |
| Da Xue Tao                 | Ref. 7       | Ref. 7         | 11.79            | 1.7                                      | 3.25                       | 1.55                              | NC                                            |
| Dan Bei Ti                 | 92.06        | 5.14           | 5.88             | 0.96                                     | 1.53                       | 0.56                              |                                               |
| Diao Zhi Bai               | Ref. 7       | Ref. 7         | 9.99             | 3.97                                     | 7.38                       | 3.4                               | MLCJ                                          |
| Elberta (Non-showy flower) | 97.52        | 6.01           | 1.49             | 7.62                                     | 10.92                      | 3.3                               |                                               |
| Fei Cheng Bai Li 10        | Ref. 7       | Ref. 7         | 3.84             | 3.23                                     | 4.98                       | 1.75                              | NC                                            |
| Fei Cheng Hong Li 6        | Ref. 7       | Ref. 7         | 19.1             | 2.31                                     | 5.96                       | 3.65                              | NC                                            |
| Feng Shou Xing             | 84.2         | 2.54           | 16.1             | 0.83                                     | 1.8                        | 0.97                              |                                               |
| Ge Gu                      | Ref. 7       | Ref. 7         | 16.11            | 2.25                                     | 5.17                       | 2.92                              | NC                                            |
| Guang He Tao (A Ba)        | Ref. 7       | Ref. 7         | 11.66            | 2.81                                     | 4.98                       | 2.17                              |                                               |
| Guang He Tao (Ri Ka Ze)    | Ref. 7       | Ref. 7         | 18.47            | 1.67                                     | 4.07                       | 2.4                               |                                               |
| Hakuho                     | Ref. 7       | Ref. 7         | 18.44            | 2.34                                     | 6.08                       | 3.75                              |                                               |
| Harrow Blood               | 97.84        | 8.39           | 1.02             | 0.75                                     | 1.05                       | 0.3                               |                                               |
| Hei Bu Dai                 | Ref. 7       | Ref. 7         | 16.06            | 2.88                                     | 6.53                       | 3.65                              | MLCJ                                          |
| Hong Chui Zhi              | Ref. 7       | Ref. 7         | 21.33            | 1.17                                     | 3.16                       | 1.99                              |                                               |
| Hong Gen Gan Su Tao        | Ref. 7       | Ref. 7         | 9.67             | 2.1                                      | 3.6                        | 1.5                               |                                               |
| Hong Hua Bi Tao            | 93.4         | 4.73           | 6.07             | 3.23                                     | 5.28                       | 2.04                              | NC                                            |
| Hong Hua Shan Tao          | Ref. 7       | Ref. 7         | 11.33            | 5.48                                     | 8.85                       | 3.37                              |                                               |
| Hong Li Guang              | Ref. 7       | Ref. 7         | 9.94             | 0.91                                     | 1.61                       | 0.71                              | NWC                                           |
| Hong Rou Guang He Tao      | Ref. 7       | Ref. 7         | 17.9             | 2.72                                     | 5.97                       | 3.25                              |                                               |

|                                      |        |        |       |      |      |      |      |
|--------------------------------------|--------|--------|-------|------|------|------|------|
| <b>Hong Shan Hu</b>                  | 96.82  | 6.22   | 1.77  | 5.56 | 7.97 | 2.41 |      |
| <b>Hong Shou Xing</b>                | Ref. 7 | Ref. 7 | 15.75 | 0.91 | 2.01 | 1.1  |      |
| <b>Hong Ya Zui</b>                   | Ref. 7 | Ref. 7 | 10.35 | 3.64 | 6.97 | 3.32 | NC   |
| <b>Hong Ye Tao</b>                   | 96.96  | 7.26   | 13.93 | 2.68 | 5.7  | 3.03 | NC   |
| <b>Hong Ye Tao Ya Bian</b>           | 86.8   | 2.95   | 1.7   | 5.01 | 7.12 | 2.1  |      |
| <b>Hua Guang</b>                     | Ref. 7 | Ref. 7 | 7.48  | 3.36 | 6.16 | 2.8  |      |
| <b>Hua Yu Lu</b>                     | Ref. 7 | Ref. 7 | 10.5  | 3.53 | 6.45 | 2.91 |      |
| <b>Huang Jin Pan Tao</b>             | 94.59  | 5.47   | 3.09  | 3.9  | 5.81 | 1.91 | MLCJ |
| <b>Hun Chun Tao</b>                  | Ref. 7 | Ref. 7 | 4.13  | 1.12 | 1.81 | 0.7  | NEC  |
| <b>Huo Lian Jin Dan</b>              | Ref. 7 | Ref. 7 | 3.55  | 3.65 | 5.53 | 1.88 | YGC  |
| <b>Ji Lin 8903</b>                   | Ref. 7 | Ref. 7 | 16.19 | 2.27 | 5.52 | 3.25 | NEC  |
| <b>Jin Feng</b>                      | Ref. 7 | Ref. 7 | 14.2  | 2.95 | 6.81 | 3.86 |      |
| <b>Jin Mi Xia Ye</b>                 | Ref. 7 | Ref. 7 | 3.99  | 2.79 | 4.37 | 1.58 |      |
| <b>Jin Ta You Pan Tao</b>            | Ref. 7 | Ref. 7 | 12.04 | 1.55 | 3.08 | 1.53 | NWC  |
| <b>Jing Yu</b>                       | Ref. 7 | Ref. 7 | 12.49 | 3.21 | 6.95 | 3.74 |      |
| <b>Ju Hua Tao</b>                    | Ref. 7 | Ref. 7 | 17.4  | 1.09 | 2.53 | 1.44 |      |
| <b>Ka Shi 1</b>                      | Ref. 7 | Ref. 7 | 15.12 | 0.86 | 1.8  | 0.95 | NWC  |
| <b>Ka Shi Huang Rou Li<br/>Guang</b> | Ref. 7 | Ref. 7 | 2.8   | 4.21 | 6.31 | 2.1  | NWC  |
| <b>Legrand</b>                       | 85.2   | 2.44   | 15.84 | 1.96 | 4.8  | 2.84 |      |
| <b>Li He Tian Ren</b>                | Ref. 7 | Ref. 7 | 2.48  | 1.14 | 1.72 | 0.58 | NWC  |
| <b>Li-07-1-13</b>                    | Ref. 7 | Ref. 7 | 10.14 | 3.34 | 6.39 | 3.05 |      |
| <b>Long 1-2-4</b>                    | Ref. 7 | Ref. 7 | 17.87 | 0.88 | 2.03 | 1.14 | NWC  |
| <b>Mai Huang Pan Tao</b>             | 97.36  | 7.64   | 1.33  | 6.11 | 8.55 | 2.44 |      |
| <b>Mao Tao (2-1-55)</b>              | 96.76  | 7.7    | 1.96  | 4.53 | 6.46 | 1.92 |      |
| <b>Maria Serena</b>                  | 95.66  | 5.38   | 2.75  | 2.34 | 3.51 | 1.17 |      |
| <b>May Fire</b>                      | Ref. 7 | Ref. 7 | 12.22 | 1.26 | 2.54 | 1.27 |      |
| <b>Mei Gui Hong</b>                  | Ref. 7 | Ref. 7 | 13.14 | 3.38 | 7.56 | 4.18 |      |
| <b>Nan Shan Tian Tao</b>             | Ref. 7 | Ref. 7 | 5.89  | 3.4  | 5.55 | 2.14 | SC   |
| <b>NJC77</b>                         | 92.45  | 5.63   | 6.66  | 2.23 | 3.55 | 1.32 |      |
| <b>NJN76</b>                         | Ref. 7 | Ref. 7 | 10.75 | 1.62 | 3.1  | 1.48 |      |
| <b>Nonpareil</b>                     | 73.52  | 5.34   | 13.82 | 2.57 | 4.43 | 1.86 |      |
| <b>Okitsu</b>                        | Ref. 7 | Ref. 7 | 17.46 | 1.94 | 4.83 | 2.89 |      |
| <b>Okubo</b>                         | Ref. 7 | Ref. 7 | 22.18 | 1.94 | 5.92 | 3.99 |      |
| <b>Phillips</b>                      | 98     | 6.1    | 1.19  | 0.88 | 1.23 | 0.36 |      |
| <b>Ping Bei Zi</b>                   | Ref. 7 | Ref. 7 | 12.06 | 3.38 | 6.82 | 3.44 | MLCJ |
| <b>Ping Ding You Pan Tao</b>         | 96.02  | 7.82   | 2.3   | 4.19 | 5.97 | 1.78 |      |
| <b>Qing Si</b>                       | Ref. 7 | Ref. 7 | 12.17 | 2.27 | 4.44 | 2.17 | YGC  |
| <b>Qing Tao</b>                      | Ref. 7 | Ref. 7 | 15.96 | 3    | 7.34 | 4.34 | YGC  |
| <b>Qing Zhou Bai Pi Mi Tao</b>       | Ref. 7 | Ref. 7 | 3.75  | 1.41 | 2.22 | 0.82 | NC   |
| <b>Redhaven</b>                      | 97.13  | 5.87   | 1.83  | 3.67 | 5.32 | 1.65 |      |
| <b>Rou Pan Tao</b>                   | Ref. 7 | Ref. 7 | 15.25 | 0.91 | 1.9  | 0.99 | NWC  |
| <b>Rui Guang 2</b>                   | Ref. 7 | Ref. 7 | 12.26 | 2.47 | 5.31 | 2.85 |      |
| <b>Rui Guang 3</b>                   | 97.14  | 6.41   | 1.75  | 5.12 | 7.33 | 2.21 |      |

|                                                  |        |        |       |      |       |      |      |
|--------------------------------------------------|--------|--------|-------|------|-------|------|------|
| <b>Sa Hong Long Zhu Tao</b>                      | Ref. 7 | Ref. 7 | 15.37 | 0.68 | 1.41  | 0.73 |      |
| <b>Sa Hong Tao</b>                               | Ref. 7 | Ref. 7 | 14.61 | 1.05 | 2.26  | 1.21 |      |
| <b>Sa Hua Hong Pan Tao</b>                       | Ref. 7 | Ref. 7 | 4.06  | 4.71 | 7.25  | 2.54 | MLCJ |
| <b>Shan Dong Si Yue Ban</b>                      | Ref. 7 | Ref. 7 | 15.23 | 1.51 | 3.38  | 1.86 | NC   |
| <b>Shan Gan Shan Tao</b>                         | Ref. 7 | Ref. 7 | 9.64  | 6.71 | 10.28 | 3.56 |      |
| <b>Shen Zhou Shui Mi</b>                         | Ref. 7 | Ref. 7 | 16.98 | 2.22 | 5.43  | 3.21 | NC   |
| <b>Shi Tou Tao</b>                               | Ref. 7 | Ref. 7 | 16.33 | 2.35 | 5.76  | 3.4  | NC   |
| <b>Shi Wo Shui Mi</b>                            | Ref. 7 | Ref. 7 | 17    | 2.21 | 5.35  | 3.14 | NC   |
| <b>Shou Bai</b>                                  | Ref. 7 | Ref. 7 | 16.69 | 0.76 | 1.54  | 0.79 |      |
| <b>Shu Guang</b>                                 | Ref. 7 | Ref. 7 | 14.82 | 2.51 | 6.06  | 3.55 |      |
| <b>Shu Guang Hong Xian Ya</b>                    |        |        |       |      |       |      |      |
| <b>Bian</b>                                      | 97.04  | 6.92   | 1.85  | 5.43 | 7.8   | 2.37 |      |
| <b>Shuang Xi Hong</b>                            | Ref. 7 | Ref. 7 | 11.28 | 2.69 | 5.59  | 2.89 |      |
| <b>Suan Tao</b>                                  | Ref. 7 | Ref. 7 | 10.44 | 2.05 | 3.98  | 1.93 | NC   |
| <b>Tian Jin Shui Mi</b>                          | Ref. 7 | Ref. 7 | 13.26 | 1.68 | 3.55  | 1.86 | NC   |
| <b>Tian Ren Tao</b>                              | Ref. 7 | Ref. 7 | 4.43  | 1.04 | 1.69  | 0.66 | NWC  |
| <b>Wu Han 2</b>                                  | 95.32  | 6.27   | 2.76  | 5.55 | 8.07  | 2.52 |      |
| <b>Wu Hei Ji Rou Tao</b>                         | Ref. 7 | Ref. 7 | 15.95 | 1.17 | 2.74  | 1.57 | MLCJ |
| <b>Wu Yue Xian</b>                               | Ref. 7 | Ref. 7 | 17.33 | 2.53 | 6.36  | 3.82 | NC   |
| <b>Wu Yue Xian Bian Gan</b>                      | Ref. 7 | Ref. 7 | 15.25 | 2.48 | 5.75  | 3.27 | NC   |
| <b>Xi Kang Bian Tao 1</b>                        | 77.25  | 4.48   | 11.43 | 2.72 | 4.66  | 1.94 |      |
| <b>Xia Miao 1</b>                                | Ref. 7 | Ref. 7 | 15.23 | 1.8  | 4.09  | 2.29 | NWC  |
| <b>Xian Tao</b>                                  | Ref. 7 | Ref. 7 | 12.78 | 0.84 | 1.68  | 0.84 | SC   |
| <b>Xin Jiang Huang Rou</b>                       | Ref. 7 | Ref. 7 | 9.99  | 1.27 | 2.36  | 1.09 | NWC  |
| <b>Xin Jiang Pan Tao</b>                         | Ref. 7 | Ref. 7 | 14.72 | 2.65 | 6.33  | 3.68 | NWC  |
| <b>Xin Jiang Pan Tao 1</b><br>(pollen sterility) | 81.6   | 2.2    | 19.27 | 1.25 | 3.09  | 1.84 | NWC  |
| <b>Yan Hong</b>                                  | Ref. 7 | Ref. 7 | 10.06 | 3.47 | 6.9   | 3.43 |      |
| <b>Yang Zhou 3</b>                               | 94.43  | 5.23   | 3.13  | 6.24 | 9.28  | 3.04 |      |
| <b>Ying Ge Tao</b>                               | Ref. 7 | Ref. 7 | 12.59 | 3.95 | 8.68  | 4.73 | SC   |
| <b>Ying Zui</b>                                  | 84.2   | 2.42   | 16.73 | 2.26 | 5.54  | 3.28 | MLCJ |
| <b>Yu Bai</b>                                    | Ref. 7 | Ref. 7 | 17.01 | 2.17 | 5.26  | 3.09 | NC   |
| <b>Yuan Yang Chui Zhi</b>                        | Ref. 7 | Ref. 7 | 18.72 | 1.04 | 2.5   | 1.46 |      |
| <b>Zao Huang Pan Tao</b>                         | 97.72  | 7.96   | 1.15  | 7.46 | 10.4  | 2.94 |      |
| <b>Zao Shang Hai Shui Mi</b>                     | Ref. 7 | Ref. 7 | 2.95  | 6.25 | 9.75  | 3.5  | MLCJ |
| <b>Zao Shu Huang Gan</b>                         | Ref. 7 | Ref. 7 | 2.11  | 4.29 | 6.17  | 1.88 | NWC  |
| <b>Zao Shu Xia Ye Tao</b>                        | 96.69  | 6.62   | 3.95  | 3.08 | 4.77  | 1.68 |      |
| <b>Zhong Hua Shou Tao</b>                        | Ref. 7 | Ref. 7 | 3.11  | 1.14 | 1.75  | 0.61 | NC   |
| <b>Zhong You Pan Tao 2</b>                       | 96.07  | 5.62   | 2.32  | 4.87 | 7.13  | 2.26 |      |
| <b>Zhong You Pan Tao 4</b>                       | 97.24  | 6.91   | 1.29  | 5.83 | 8.18  | 2.35 |      |
| <b>Zhong You Tao 4</b>                           | 95.66  | 7      | 2.87  | 5.32 | 7.83  | 2.51 |      |
| <b>Zhong You Tao 4 Zao Shu</b><br><b>Ya Bian</b> | 95.75  | 5.95   | 3.03  | 5.56 | 8.09  | 2.52 |      |
| <b>Zhong You Tao 5</b>                           | 95.9   | 5.8    | 1.82  | 5.47 | 7.92  | 2.44 |      |

|                                                     |        |        |       |      |      |      |
|-----------------------------------------------------|--------|--------|-------|------|------|------|
| <b>Zhong You Tao 5 Zao Shu<br/>Ya Bian</b>          | 96.75  | 5.66   | 2.88  | 5.16 | 7.63 | 2.46 |
| <b>Zhong You Tao 9</b>                              | 96.87  | 6.92   | 1.33  | 5.49 | 7.68 | 2.2  |
| <b>Zhong You Tao 9 Hei Xian<br/>Bai Rou Ya Bian</b> | 95.73  | 5.51   | 1.74  | 5.29 | 7.54 | 2.24 |
| <b>Zhong You Tao 9 Huang<br/>Rou Ya Bian</b>        | 96.77  | 6.45   | 2.81  | 4.75 | 7.09 | 2.34 |
| <b>Zhong You Tao 9 Wang<br/>Shu Ya Bian</b>         | 97.25  | 7.35   | 1.8   | 5.17 | 7.41 | 2.24 |
| <b>Zhou Xing Shan Tao</b>                           | Ref. 7 | Ref. 7 | 15.28 | 4.91 | 9.2  | 4.29 |
| <b>Zhu Fen Chui Zhi</b>                             | Ref. 7 | Ref. 7 | 18.21 | 1.17 | 2.77 | 1.6  |
| <b>Average</b>                                      | 89.28  | 4.21   | 10.1  | 3.08 | 5.54 | 2.45 |

156 The codes for the six geographic regions are as follows: Northwest China (NWC),  
157 YunGui plateau (YGC), Northeast China (NEC), Northern China (NC), the middle  
158 and lower reaches of the Changjiang River (MLCJ), and Southern China (SC).

159 **Supplementary Table 4: Validation of SNPs calling before imputation and after**  
 160 **that using Sequenom MassARRAY platform.**

|                                                               | <b>Resequencing data<br/>before imputation</b> | <b>Resequencing data<br/>after imputation</b> |
|---------------------------------------------------------------|------------------------------------------------|-----------------------------------------------|
| <b>Untyped</b>                                                | 303                                            | 57                                            |
| <b>Consistent homozygous loci with MassARRAY</b>              | 2832                                           | 2921                                          |
| <b>Inconsistent homozygous loci with MassARRAY</b>            | 194                                            | 193                                           |
| <b>Consistent heterozygous loci with MassARRAY</b>            | 290                                            | 325                                           |
| <b>Inconsistent heterozygous loci with MassARRAY</b>          | 56                                             | 74                                            |
| <b>Total</b>                                                  | 3675                                           | 3570                                          |
| <b>Percent of untyped loci</b>                                | 8.24%                                          | 1.60%                                         |
| <b>Percent of consistent homozygous loci with MassARRAY</b>   | 93.59%                                         | 93.80%                                        |
| <b>Percent of consistent heterozygous loci with MassARRAY</b> | 83.82%                                         | 81.45%                                        |

161 **Supplementary Table 5: Average heterozygosity rates of total imputed SNPs in**  
 162 **the different sample groups.**

| Groups                      | Subgroups             | Group capacity (n) | Heterozygosity rates [imputed] (%) |
|-----------------------------|-----------------------|--------------------|------------------------------------|
| <b>Wild related species</b> | Almond                | 2                  | 1.90%                              |
|                             | <i>P. mira</i>        | 3                  | 2.61%                              |
|                             | <i>P. davidiana</i>   | 5                  | 5.91%                              |
|                             | <i>P. kansuensis</i>  | 2                  | 1.60%                              |
|                             | Total                 | 12                 | 3.61%                              |
| <b>Landraces</b>            | Landraces, Ornamental | 9                  | 1.25%                              |
|                             | Landraces, edible     | 53                 | 2.32%                              |
|                             | Total                 | 62                 | 2.17%                              |
| <b>Improved varieties</b>   | Occidental            | 10                 | 1.57%                              |
|                             | Oriental              | 45                 | 2.71%                              |
|                             | Total                 | 55                 | 2.50%                              |

163 In the table, the description of all accession derived from two Supplementary Table 1  
 164 in this and previous study<sup>7</sup>.

165 **Supplementary Table 6: The polymorphism and SNP count of total imputed**  
 166 **SNPs in the different sample groups.**

| Group                                                  | Wild related species | Cultivated |            |                 |                    |            |          |
|--------------------------------------------------------|----------------------|------------|------------|-----------------|--------------------|------------|----------|
|                                                        |                      | Total      | Ornamental | Edible landrace | Improved varieties |            |          |
|                                                        |                      |            |            |                 | Total              | Occidental | Oriental |
| <b>Group capacity (n)</b>                              | 12                   | 117        | 9          | 53              | 55                 | 10         | 45       |
| <b>Polymorphism <math>\pi</math> (10<sup>-3</sup>)</b> | 5.74                 | 1.83       | 1.47       | 1.86            | 1.55               | 1.38       | 1.55     |
| <b>SNP count (<math>\times 10^6</math>)</b>            | 3.63                 | 1.67       | 0.93       | 1.53            | 1.39               | 1.35       | 0.92     |

167 Differences in polymorphism indicate that peach edible landraces retain little  
 168 nucleotide diversity and exhibit a clear genetic differentiation from their wild  
 169 progenitor. The nucleotide diversity ( $\pi$ ) of wild species (*P. davidiana*, *P. mira*, and *P.*  
 170 *kansuensis*) is higher than that of peach edible landraces, highlighting the strong  
 171 reduction of variability associated with domestication.



172 **Supplementary Table 7: Association analysis of 10 qualitative traits in 129 peach**  
 173 **accessions using different models.**

| Trait                       | GLM (no PCA)   | -Log <sub>10</sub> (p) | GLM (PCA)      | -Log <sub>10</sub> (p) | MLM            | -Log <sub>10</sub> (p) |
|-----------------------------|----------------|------------------------|----------------|------------------------|----------------|------------------------|
| <b>Flesh adhesion</b>       | Chr4: 22696643 | 9.93                   | Chr4: 22695515 | 10.2                   | Chr4: 26142583 | 5.81                   |
|                             |                |                        |                |                        | Chr4: 22695515 | 5.33                   |
|                             |                |                        |                |                        | Chr4: 26945751 | 4.85                   |
| <b>Flesh texture</b>        | Chr4: 22695495 | 18.12                  | Chr4: 22695495 | 14.22                  | Chr8: 2759375  | 6.49                   |
|                             |                |                        |                |                        | Chr1: 36970794 | 6.03                   |
|                             |                |                        |                |                        | Chr2: 11354439 | 5.53                   |
| <b>Flesh color</b>          | Chr6: 2183867  | 7.95                   | Chr8: 16905885 | 7.13                   | Chr8: 16795565 | 4.65                   |
| <b>around stone</b>         | Chr1: 45251328 | 7.83                   | Chr7: 12901845 | 6.89                   | Chr1: 31040363 | 4.62                   |
|                             | Chr7: 12901845 | 7.33                   | Chr6: 11954708 | 6.78                   | Chr4: 19678521 | 4.48                   |
| <b>Flower shape-DoubleF</b> | Chr2: 21480531 | 50.81                  | Chr2: 21480531 | 46.55                  | Chr6: 17602373 | 12.28                  |
|                             |                |                        |                |                        | Chr8: 4862362  | 12.02                  |
|                             |                |                        |                |                        | Chr2: 15719828 | 11.88                  |
| <b>Flower shape-showyF</b>  | Chr8: 13740117 | 24.19                  | Chr8: 13740117 | 23.86                  | Chr8: 13740117 | 11.93                  |
|                             | Chr8: 16687764 | 23.87                  | Chr8: 16746058 | 15.62                  | Chr7: 21584843 | 8.61                   |
|                             | Chr8: 16746058 | 23.76                  | Chr8: 16807476 | 15.14                  |                |                        |
| <b>Fruit flesh color</b>    | Chr1: 24820676 | 16.91                  | Chr1: 24968892 | 13.72                  | Chr1: 24968892 | 8.74                   |
|                             |                |                        | Chr1: 24863116 | 12.98                  | Chr1: 24863116 | 8.13                   |
| <b>Fruit hairiness</b>      | Chr5: 18238151 | 30.87                  | Chr5: 18238151 | 18.41                  | Chr5: 18238151 | 9.5                    |
|                             | Chr5: 17576893 | 27.11                  | Chr5: 16646429 | 16.01                  | Chr5: 16646429 | 9.06                   |
|                             | Chr5: 16646429 | 26.88                  | Chr5: 17576893 | 15.94                  | Chr7: 3304942  | 8.18                   |
| <b>Fruit shape</b>          | Chr6: 25060196 | 27.13                  | Chr6: 25060196 | 26.04                  | Chr6: 25060196 | 12.46                  |
|                             | Chr6: 27109034 | 18.64                  | Chr6: 27109034 | 18.36                  | Chr6: 27109034 | 10.25                  |
|                             | Chr6: 25142326 | 15.26                  | Chr6: 25142326 | 15.31                  | Chr6: 25142326 | 9.62                   |
| <b>Kernel taste</b>         | Chr2: 9680893  | 46                     | Chr2: 9820779  | 61.79                  | Chr2: 9820779  | 17.32                  |
|                             | Chr2: 9820626  | 41.44                  | Chr2: 9680893  | 48.37                  | Chr5: 12622852 | 16.81                  |
|                             | Chr4: 3179343  | 41.43                  | Chr5: 12622852 | 40.93                  |                |                        |
| <b>Non-acid fruit</b>       | Chr5: 588359   | 33.68                  | Chr5: 588359   | 26.16                  | Chr5: 628407   | 10.5                   |
|                             | Chr5: 996915   | 31.16                  | Chr5: 996915   | 24.9                   | Chr5: 764830   | 10.01                  |
|                             | Chr5: 764830   | 28.18                  | Chr5: 541075   | 20.77                  |                |                        |

174 In the different models, we selected only one peak association signal if it has a near  
 175 physical distance with the next signal according to P value degree no more than 50 kb.  
 176 And if the distance was longer than that threshold, another two signals were selected  
 177 as candidate SNPs.

178 **Supplementary Table 8: Previously reported linkage results for several**  
 179 **qualitative traits in peach.**

| <b>Traits</b>                   | <b>Linkage group</b> | <b>Linkage map</b>  | <b>The genetics distance in the T×E groups (cM)</b> | <b>The corresponding physical location estimated through linkage analysis (Mb)</b> | <b>Reference</b> |
|---------------------------------|----------------------|---------------------|-----------------------------------------------------|------------------------------------------------------------------------------------|------------------|
| <b>Fruit hairiness</b>          | 5                    | Peach-JF-F2-2006    | 81.4                                                | 14.7                                                                               | GDR website      |
| <b>Fruit shape</b>              | 6                    | Peach-JF-F2-2006    | 72.6                                                | 24.7                                                                               |                  |
| <b>Flesh adhesion</b>           | 4                    | Prunus-TE-F2        | 52.0                                                | 22.6                                                                               |                  |
| <b>Flesh texture</b>            | 4                    | Prunus-TE-F2        | 52.0                                                | 22.6                                                                               |                  |
| <b>Fruit flesh color</b>        | 1                    | Prunus-TE-F2        | 31.0                                                | 16.7                                                                               |                  |
| <b>Flesh color around stone</b> | 3                    | Prunus-TE-F2        | 17.0                                                | 7.7                                                                                |                  |
| <b>Non-acid fruit</b>           | 5                    | Prunus-TE-F2        | 6.0                                                 | 0.9                                                                                |                  |
| <b>Flower shape-DoubleF</b>     | 2                    | Peach-NJPKV77119-F2 | 7.2                                                 | /                                                                                  |                  |
| <b>Flower shape-ShowyF</b>      | 8                    | Peach-DG-F1-2009    | 34.4                                                | 8.3                                                                                |                  |
| <b>Kernel taste</b>             | 5                    | Prunus-TE-F2        | 32.9                                                | 12.4                                                                               |                  |

180 GDR website: [www.rosaceae.org](http://www.rosaceae.org).

**Supplementary Table 9: Agronomic traits of the additional 345 accessions.**

| Accessions                      | Origin | Description         | Fruit hairiness | Fruit shape | Fruit flesh color | Non-acid fruit | Flower shape-DoubleF | Flower shape-ShowyF | Flesh adhesion | Flesh texture |
|---------------------------------|--------|---------------------|-----------------|-------------|-------------------|----------------|----------------------|---------------------|----------------|---------------|
| <b>8501</b>                     | PRC    | Edible landrace     | Peach           | Round       | White             | Acid           | Single               | Showy               | Freestone      | Melting       |
| <b>8601</b>                     | PRC    | Edible landrace     | Peach           | Round       | White             | Acid           | Single               | Showy               | Clingstone     | Melting       |
| <b>8701</b>                     | PRC    | Edible landrace     | Peach           | Round       | White             | Acid           | Single               | Showy               | Freestone      | Melting       |
| <b>8801</b>                     | PRC    | Edible landrace     | Peach           | Round       | White             | Acid           | Single               | Showy               | Freestone      | Melting       |
| <b>124 Pan Tao</b>              | PRC    | Improved variety    | Peach           | Flat        | White             | Non-acid       | Single               | Showy               | Clingstone     | Melting       |
| <b>21 Shi Ji</b>                | PRC    | Improved variety    | Peach           | Round       | White             | Non-acid       | Single               | Showy               | Clingstone     | Melting       |
| <b>82-9</b>                     | PRC    | Improved variety    | Peach           | Round       | White             | Acid           | Single               | Showy               | Clingstone     | Melting       |
| <b>A Bu Bai Tao</b>             | Japan  | Improved variety    | Peach           | Round       | White             | Non-acid       | Single               | Showy               | Clingstone     | Melting       |
| <b>Akatsuki</b>                 | Japan  | Improved variety    | Peach           | Round       | White             | Non-acid       | Single               | Showy               | Clingstone     | Melting       |
| <b>Amusiding</b>                | USA    | Improved variety    | Peach           | Round       | White             | Acid           | Single               | Showy               | Clingstone     | Melting       |
| <b>An Nong Shui Mi</b>          | PRC    | Improved variety    | Peach           | Round       | White             | Non-acid       | Single               | Showy               | Clingstone     | Melting       |
| <b>Anlong Bai Tao</b>           | PRC    | Edible landrace     | Peach           | Round       | White             | Acid           | Single               | Showy               | Freestone      | Melting       |
| <b>Asama Hakuto</b>             | Japan  | Improved variety    | Peach           | Round       | White             | Non-acid       | Single               | Showy               | Clingstone     | Melting       |
| <b>Baby Gold 5#</b>             | USA    | Improved variety    | Peach           | Round       | Yellow            | Acid           | Single               | Non-showy           | Clingstone     | Non-melting   |
| <b>Baby Gold 7#</b>             | USA    | Improved variety    | Peach           | Round       | Yellow            | Acid           | Single               | Non-showy           | Clingstone     | Non-melting   |
| <b>Baby Gold 8#</b>             | USA    | Improved variety    | Peach           | Round       | Yellow            | Acid           | Single               | Non-showy           | Clingstone     | Non-melting   |
| <b>Bai Chong Ban Chui Zhi</b>   | USA    | Ornamental landrace | Peach           | Round       | White             | Acid           | Double               | Showy               | Clingstone     | Melting       |
| <b>Bai Dan Ban</b>              | PRC    | Ornamental landrace | Peach           | Round       | NA                | NA             | Single               | Showy               | NA             | NA            |
| <b>Bai Dan Ban Chui Zhi Tao</b> | PRC    | Improved variety    | Peach           | Round       | White             | Acid           | Single               | NA                  | Freestone      | Melting       |
| <b>Bai He Tao</b>               | PRC    | Edible landrace     | Peach           | Round       | White             | Acid           | Single               | Showy               | Freestone      | Melting       |
| <b>Bai Li Hu</b>                | PRC    | Edible landrace     | Peach           | Round       | White             | Acid           | Single               | Showy               | Freestone      | Melting       |
| <b>Bai Mang Pan Tao</b>         | PRC    | Edible landrace     | Peach           | Flat        | White             | Non-acid       | Single               | Showy               | Clingstone     | Melting       |

|                                    |       |                     |           |       |        |          |        |           |            |             |
|------------------------------------|-------|---------------------|-----------|-------|--------|----------|--------|-----------|------------|-------------|
| <b>Bai Nian He</b>                 | PRC   | Edible landrace     | Peach     | Round | White  | Acid     | Single | Showy     | Clingstone | Non-melting |
| <b>Bai Nian Hu</b>                 | PRC   | Edible landrace     | Peach     | Round | White  | Acid     | Single | Showy     | Clingstone | Non-melting |
| <b>Baisha</b>                      | PRC   | Edible landrace     | Peach     | Round | White  | Non-acid | Single | Showy     | Freestone  | Melting     |
| <b>Bao Chun</b>                    | PRC   | Ornamental landrace | Peach     | Round | White  | Acid     | Double | Showy     | Clingstone | Melting     |
| <b>Bei Nong 2#</b>                 | PRC   | Improved variety    | Peach     | Round | White  | Non-acid | Single | Showy     | Clingstone | Melting     |
| <b>Bei Nong Zao Shu</b>            | PRC   | Improved variety    | Peach     | Round | White  | Acid     | Single | Showy     | Clingstone | Melting     |
| <b>Beijing Wang Pan Tao</b>        | PRC   | Edible landrace     | Peach     | Flat  | White  | Non-acid | Single | Showy     | Clingstone | Melting     |
| <b>Bi Tao</b>                      | PRC   | Ornamental landrace | Peach     | Round | NA     | NA       | Double | NA        | NA         | NA          |
| <b>Bi Xia Pan Tao</b>              | PRC   | Improved variety    | Peach     | Flat  | White  | Non-acid | Single | Showy     | Clingstone | Melting     |
| <b>Chang Sheng Pan Tao</b>         | PRC   | Edible landrace     | Peach     | Flat  | White  | Non-acid | Single | Showy     | Clingstone | Melting     |
| <b>Changling Zao Yu Lu</b>         | PRC   | Edible landrace     | Peach     | Round | White  | Non-acid | Single | Showy     | Freestone  | Melting     |
| <b>Changze Hakuho</b>              | Japan | Improved variety    | Peach     | Round | White  | Non-acid | Single | Showy     | Clingstone | Melting     |
| <b>Chen Pu Pan Tao</b>             | PRC   | Edible landrace     | Peach     | Flat  | White  | Non-acid | Single | Showy     | Clingstone | Melting     |
| <b>Cheng Xiang</b>                 | PRC   | Improved variety    | Peach     | Round | Yellow | Acid     | Single | Showy     | Freestone  | Melting     |
| <b>Cheng Yan</b>                   | PRC   | Improved variety    | Peach     | Round | Yellow | Acid     | Single | Showy     | Clingstone | Non-melting |
| <b>Chi Yuan Mi</b>                 | PRC   | Improved variety    | Peach     | Round | White  | Non-acid | Single | Showy     | Clingstone | Melting     |
| <b>Chiyemarn</b>                   | USA   | Improved variety    | Peach     | Round | Yellow | Non-acid | Single | Showy     | Clingstone | Melting     |
| <b>Chun Lei</b>                    | PRC   | Improved variety    | Peach     | Round | White  | Non-acid | Single | Showy     | Freestone  | Melting     |
| <b>Compact Elberta</b>             | USA   | Improved variety    | Peach     | Round | Yellow | Acid     | Single | Non-showy | Freestone  | Melting     |
| <b>Cullinan</b>                    | USA   | Improved variety    | Peach     | Round | Yellow | Acid     | Single | Non-showy | Freestone  | Melting     |
| <b>Da Bai Suan</b>                 | PRC   | Improved variety    | Nectarine | Round | White  | Acid     | Single | Showy     | Clingstone | Melting     |
| <b>Da Hong Pao (Hubei Gucheng)</b> | PRC   | Edible landrace     | Peach     | Round | White  | Non-acid | Single | Showy     | Freestone  | Melting     |
| <b>Da Jin Dan</b>                  | PRC   | Edible landrace     | Peach     | Round | Yellow | Acid     | Single | Showy     | Freestone  | Melting     |
| <b>Da Li He Huang Rou</b>          | PRC   | Edible landrace     | Peach     | Round | Yellow | Acid     | Single | Showy     | Freestone  | Melting     |
| <b>Da Zhao Huang Tao</b>           | PRC   | Edible landrace     | Peach     | Round | Yellow | Non-acid | Single | Showy     | Freestone  | Melting     |

|                               |       |                     |           |       |        |          |        |           |            |             |
|-------------------------------|-------|---------------------|-----------|-------|--------|----------|--------|-----------|------------|-------------|
| <b>Da Zhen Bao Chi Yue</b>    | PRC   | Improved variety    | Peach     | Round | White  | Non-acid | Single | Showy     | Clingstone | Melting     |
| <b>Dalian 22-6</b>            | PRC   | Improved variety    | Peach     | Round | Yellow | Acid     | Single | Showy     | Clingstone | Non-melting |
| <b>Dalian 22-8</b>            | PRC   | Improved variety    | Peach     | Round | Yellow | Acid     | Single | Showy     | Clingstone | Melting     |
| <b>Dan Bai Ai You</b>         | PRC   | Improved variety    | Nectarine | Round | White  | Non-acid | NA     | NA        | Clingstone | Melting     |
| <b>Dan Ban Zi Tao</b>         | PRC   | Ornamental landrace | Peach     | Round | White  | Acid     | Single | NA        | Clingstone | Melting     |
| <b>Dan Mo</b>                 | PRC   | Improved variety    | Nectarine | Round | Yellow | Non-acid | Single | Non-showy | Clingstone | Melting     |
| <b>Dawangzhuang Huang Tao</b> | PRC   | Edible landrace     | Peach     | Round | Yellow | Acid     | Single | Showy     | Clingstone | Non-melting |
| <b>Denjiulo</b>               | Japan | Improved variety    | Peach     | Round | White  | Acid     | Single | Showy     | Freestone  | Melting     |
| <b>Dicon</b>                  | USA   | Improved variety    | Peach     | Round | Yellow | Acid     | Single | Non-showy | Clingstone | Non-melting |
| <b>Dixired</b>                | USA   | Improved variety    | Peach     | Round | Yellow | Acid     | Single | Non-showy | Freestone  | Melting     |
| <b>Dunhuang Dong Tao</b>      | PRC   | Edible landrace     | Peach     | Round | White  | Acid     | Single | Showy     | Clingstone | Non-melting |
| <b>Durbin</b>                 | USA   | Improved variety    | Nectarine | Round | Yellow | Acid     | Single | Non-showy | Freestone  | Melting     |
| <b>Dwarf Norman</b>           | USA   | Improved variety    | Peach     | Round | Yellow | Acid     | Single | Showy     | Freestone  | Melting     |
| <b>Early Red 2#</b>           | USA   | Improved variety    | Nectarine | Round | Yellow | Acid     | Single | Showy     | Freestone  | Melting     |
| <b>Elberta (Showy)</b>        | USA   | Improved variety    | Peach     | Round | Yellow | Acid     | Single | Showy     | Freestone  | Melting     |
| <b>Er Jie Bai</b>             | PRC   | Edible landrace     | Peach     | Round | White  | Non-acid | Single | Showy     | Clingstone | Melting     |
| <b>Er Zao Tao</b>             | PRC   | Edible landrace     | Peach     | Round | White  | Acid     | Single | Showy     | Clingstone | Non-melting |
| <b>Fantasia</b>               | USA   | Improved variety    | Nectarine | Round | Yellow | Acid     | Single | Showy     | Freestone  | Melting     |
| <b>Favolate 2#</b>            | Italy | Improved variety    | Peach     | Round | Yellow | Acid     | Single | Non-showy | Clingstone | Melting     |
| <b>Favolate 3#</b>            | Italy | Improved variety    | Peach     | Round | Yellow | Acid     | Single | Showy     | Freestone  | Melting     |
| <b>Fay Elberta</b>            | USA   | Improved variety    | Peach     | Round | Yellow | Acid     | Single | Showy     | Freestone  | Melting     |
| <b>Fayette</b>                | USA   | Improved variety    | Peach     | Round | Yellow | Acid     | Single | Non-showy | Freestone  | Melting     |
| <b>Fei Cheng Bai Li 17#</b>   | PRC   | Edible landrace     | Peach     | Round | White  | Non-acid | Single | Showy     | Clingstone | Melting     |
| <b>Fei Tao</b>                | PRC   | Ornamental landrace | Peach     | Round | White  | Acid     | Double | NA        | Clingstone | Melting     |
| <b>Fen Hong Bi Tao</b>        | PRC   | Ornamental landrace | Peach     | Round | NA     | NA       | Double | NA        | NA         | NA          |
| <b>Fen Ling Chong</b>         | PRC   | Ornamental landrace | Peach     | Round | White  | Acid     | Double | Non-showy | Clingstone | Melting     |

|                             |        |                  |           |       |        |          |        |           |            |             |
|-----------------------------|--------|------------------|-----------|-------|--------|----------|--------|-----------|------------|-------------|
| <b>Feng Bai</b>             | PRC    | Improved variety | Peach     | Round | White  | Acid     | Single | Showy     | Freestone  | Melting     |
| <b>Feng Huang</b>           | PRC    | Improved variety | Peach     | Round | Yellow | Acid     | Single | Showy     | Clingstone | Non-melting |
| <b>Fenghua Pan Tao</b>      | PRC    | Edible landrace  | Peach     | Flat  | White  | Non-acid | Single | Showy     | Clingstone | Melting     |
| <b>Flavortop</b>            | USA    | Improved variety | Nectarine | Round | Yellow | Acid     | Single | Showy     | Freestone  | Melting     |
| <b>Flordadown</b>           | USA    | Improved variety | Peach     | Round | Yellow | Acid     | Single | Showy     | Freestone  | Melting     |
| <b>Flordagold</b>           | USA    | Improved variety | Peach     | Round | Yellow | Acid     | Single | Showy     | Freestone  | Melting     |
| <b>Flordaking</b>           | USA    | Improved variety | Peach     | Round | Yellow | Acid     | Single | Non-showy | Clingstone | Melting     |
| <b>Gan Xuan 2#</b>          | PRC    | Improved variety | Peach     | Round | Yellow | Acid     | Single | Showy     | Clingstone | Melting     |
| <b>Gan Xuan 4#</b>          | PRC    | Improved variety | Peach     | Round | White  | Non-acid | Single | Showy     | Freestone  | Melting     |
| <b>Gaotai 1#</b>            | PRC    | Edible landrace  | Peach     | Round | White  | Acid     | Single | Showy     | Clingstone | Non-melting |
| <b>GF677</b>                | France | Improved variety | Peach     | Round | White  | Acid     | Single | Showy     | Clingstone | Melting     |
| <b>Goldcrest</b>            | USA    | Improved variety | Peach     | Round | Yellow | Acid     | Single | Showy     | Clingstone | Melting     |
| <b>Grand 1#</b>             | USA    | Improved variety | Nectarine | Round | Yellow | Acid     | Single | Showy     | Clingstone | Melting     |
| <b>Grand 2#</b>             | USA    | Improved variety | Nectarine | Round | Yellow | Acid     | Single | Showy     | Freestone  | Melting     |
| <b>Gu Ba Hong Tian Tao</b>  | Cuba   | Improved variety | Peach     | Round | White  | Non-acid | Single | Showy     | Clingstone | Non-melting |
| <b>Gu Cheng Chun Lei</b>    | PRC    | Edible landrace  | Peach     | Round | White  | Non-acid | Single | Showy     | Clingstone | Melting     |
| <b>Gua Tao</b>              | PRC    | Edible landrace  | Peach     | Round | Yellow | Acid     | Single | Showy     | Freestone  | Melting     |
| <b>Guangyi Bai Hua Tao</b>  | PRC    | Edible landrace  | Peach     | Round | White  | Non-acid | Single | Showy     | Freestone  | Melting     |
| <b>Guangyi Wu Yue Tao</b>   | PRC    | Edible landrace  | Peach     | Round | White  | Non-acid | Single | Showy     | Clingstone | Melting     |
| <b>Guizhou Shui Mi</b>      | PRC    | Edible landrace  | Peach     | Round | White  | Non-acid | Single | Showy     | Clingstone | Melting     |
| <b>Ha Lu Hong Shi Sheng</b> | PRC    | Improved variety | Peach     | Round | White  | Acid     | Single | Non-showy | Freestone  | Melting     |
| <b>Hakuto</b>               | Japan  | Improved variety | Peach     | Round | White  | Non-acid | Single | Showy     | Clingstone | Melting     |
| <b>Han Lu Mi</b>            | PRC    | Edible landrace  | Peach     | Round | White  | Non-acid | Single | Showy     | Clingstone | Melting     |
| <b>Hang Yu</b>              | PRC    | Improved variety | Peach     | Round | White  | Non-acid | Single | Showy     | Clingstone | Melting     |
| <b>Hangzhou Zao Shui Mi</b> | PRC    | Improved variety | Peach     | Round | White  | Acid     | Single | Showy     | Clingstone | Melting     |
| <b>Harmony</b>              | USA    | Improved variety | Peach     | Round | Yellow | Acid     | Single | Non-showy | Freestone  | Melting     |

|                              |       |                     |           |       |        |          |        |           |            |             |
|------------------------------|-------|---------------------|-----------|-------|--------|----------|--------|-----------|------------|-------------|
| <b>Hatsukami</b>             | Japan | Improved variety    | Peach     | Round | White  | Non-acid | Single | Showy     | Clingstone | Melting     |
| <b>Hefei Zao Tian Tao</b>    | PRC   | Improved variety    | Peach     | Round | NA     | NA       | NA     | NA        | NA         | NA          |
| <b>Hetian Huang Rou</b>      | PRC   | Edible landrace     | Peach     | Round | Yellow | Acid     | Single | Showy     | Freestone  | Melting     |
| <b>Hetian Wan You Tao</b>    | PRC   | Edible landrace     | Nectarine | Round | Yellow | Acid     | Single | Showy     | Clingstone | Melting     |
| <b>Heyang You Tao</b>        | PRC   | Edible landrace     | Nectarine | Round | Yellow | Acid     | Single | Showy     | Freestone  | Melting     |
| <b>Hong Gan Lu</b>           | PRC   | Improved variety    | Peach     | Round | White  | Non-acid | Single | Showy     | Clingstone | Melting     |
| <b>Hong Ling Chong</b>       | PRC   | Ornamental landrace | Peach     | Round | White  | Acid     | Double | Non-showy | Clingstone | Melting     |
| <b>Hong Qing Shui</b>        | Japan | Improved variety    | Peach     | Round | White  | Non-acid | Single | Showy     | Clingstone | Melting     |
| <b>Hong Tao</b>              | PRC   | Edible landrace     | Peach     | Round | White  | Acid     | Single | Showy     | Freestone  | Melting     |
| <b>Hong Xian Shu Guang</b>   | PRC   | Improved variety    | Nectarine | Round | Yellow | Non-acid | NA     | NA        | Clingstone | Melting     |
| <b>Hu You 004#</b>           | PRC   | Improved variety    | Nectarine | Round | Yellow | Non-acid | Single | Showy     | Freestone  | Melting     |
| <b>Huang La Tao</b>          | PRC   | Edible landrace     | Peach     | Round | Yellow | Acid     | Single | Showy     | Freestone  | Melting     |
| <b>Huang Li Guang</b>        | PRC   | Edible landrace     | Nectarine | Round | Yellow | Acid     | Single | Showy     | Freestone  | Melting     |
| <b>Huang Nian He</b>         | PRC   | Edible landrace     | Peach     | Round | Yellow | Acid     | Single | Showy     | Clingstone | Non-melting |
| <b>Huang Yan</b>             | PRC   | Edible landrace     | Peach     | Round | Yellow | Acid     | Single | Showy     | Clingstone | Non-melting |
| <b>Hui Yu Lu</b>             | PRC   | Improved variety    | Peach     | Round | White  | Non-acid | Single | Showy     | Clingstone | Melting     |
| <b>Improved Flavor Crest</b> | USA   | Improved variety    | Peach     | Round | Yellow | Acid     | Single | Showy     | Freestone  | Melting     |
| <b>Ji Zui Bai</b>            | PRC   | Edible landrace     | Peach     | Round | White  | Non-acid | Single | Showy     | Freestone  | Melting     |
| <b>Jia Na Yan</b>            | Japan | Improved variety    | Peach     | Round | White  | Non-acid | Single | Showy     | Clingstone | Melting     |
| <b>Jiang Tao</b>             | PRC   | Ornamental landrace | Peach     | Round | White  | Acid     | Double | NA        | Clingstone | Melting     |
| <b>Jiangcun 1#</b>           | PRC   | Edible landrace     | Peach     | Round | Yellow | Acid     | Single | Showy     | Freestone  | Melting     |
| <b>Jiangcun 4#</b>           | PRC   | Edible landrace     | Peach     | Round | Yellow | Acid     | Single | Showy     | Clingstone | Non-melting |
| <b>Jiangcun 5#</b>           | PRC   | Edible landrace     | Peach     | Round | Yellow | Acid     | Single | Showy     | Clingstone | Non-melting |
| <b>Jiaqing Pan Tao</b>       | PRC   | Edible landrace     | Peach     | Flat  | White  | Non-acid | Single | Showy     | Clingstone | Melting     |
| <b>Jie Tu Bai</b>            | PRC   | Improved variety    | Peach     | Round | White  | Non-acid | Single | Showy     | Freestone  | Melting     |
| <b>Jin Shuo</b>              | PRC   | Improved variety    | Nectarine | Round | Yellow | Non-acid | Single | Showy     | Clingstone | Melting     |



|                            |       |                     |           |       |        |          |        |           |            |             |
|----------------------------|-------|---------------------|-----------|-------|--------|----------|--------|-----------|------------|-------------|
| <b>Jin Xiu</b>             | PRC   | Improved variety    | Peach     | Round | Yellow | Non-acid | Single | Showy     | Clingstone | Melting     |
| <b>Jing Chun</b>           | PRC   | Improved variety    | Peach     | Round | White  | Non-acid | Single | Showy     | Clingstone | Melting     |
| <b>Jing Mi</b>             | PRC   | Improved variety    | Peach     | Round | White  | Non-acid | Single | Showy     | Clingstone | Melting     |
| <b>Jing Yan</b>            | PRC   | Improved variety    | Peach     | Round | White  | Non-acid | Single | Showy     | Clingstone | Melting     |
| <b>Jingmen Tao (Mao)</b>   | PRC   | Edible landrace     | Peach     | Round | White  | Non-acid | Single | Showy     | Freestone  | Melting     |
| <b>Jingmen Tao (You)</b>   | PRC   | Edible landrace     | Nectarine | Round | NA     | NA       | Single | Showy     | NA         | NA          |
| <b>Jiu Yang Qing Tao</b>   | PRC   | Edible landrace     | Peach     | Round | White  | Acid     | Single | Showy     | Freestone  | Melting     |
| <b>June Gold</b>           | USA   | Improved variety    | Peach     | Round | Yellow | Acid     | Single | Showy     | Freestone  | Melting     |
| <b>June prince</b>         | USA   | Improved variety    | Nectarine | Round | Yellow | Acid     | Single | Showy     | Freestone  | Melting     |
| <b>Jushan Tong Tao</b>     | PRC   | Edible landrace     | Peach     | Round | White  | Non-acid | Single | Showy     | Freestone  | Melting     |
| <b>Kan Zhu Bai Tao</b>     | Japan | Improved variety    | Peach     | Round | White  | Non-acid | Single | Showy     | Clingstone | Melting     |
| <b>Kanto 14#</b>           | Japan | Improved variety    | Peach     | Round | Yellow | Acid     | Single | Non-showy | Clingstone | Non-melting |
| <b>Kanto 5#</b>            | Japan | Improved variety    | Peach     | Round | Yellow | Acid     | Single | Showy     | Clingstone | Non-melting |
| <b>Kashi 2#</b>            | PRC   | Edible landrace     | Peach     | Round | White  | Acid     | Single | Showy     | Freestone  | Melting     |
| <b>Kashi 3#</b>            | PRC   | Edible landrace     | Peach     | Round | White  | Acid     | Single | Showy     | Freestone  | Melting     |
| <b>Kashi 4#</b>            | PRC   | Edible landrace     | Peach     | Round | White  | Acid     | Single | Showy     | Freestone  | Melting     |
| <b>Kawanakajima Hakuto</b> | Japan | Improved variety    | Peach     | Round | White  | Non-acid | Single | Showy     | Clingstone | Melting     |
| <b>Kogetsu</b>             | Japan | Improved variety    | Peach     | Round | White  | Non-acid | Single | Showy     | Clingstone | Melting     |
| <b>Kurakato Wase</b>       | Japan | Improved variety    | Peach     | Round | White  | Non-acid | Single | Showy     | Clingstone | Melting     |
| <b>Lai Shan Mi</b>         | PRC   | Improved variety    | Peach     | Round | White  | Non-acid | Single | Showy     | Clingstone | Melting     |
| <b>Le Yuan</b>             | PRC   | Ornamental landrace | Nectarine | Round | Yellow | Acid     | Single | Showy     | Freestone  | Melting     |
| <b>Li He Pan Tao</b>       | PRC   | Edible landrace     | Peach     | Flat  | White  | Non-acid | Single | Showy     | Freestone  | Melting     |
| <b>Lian Huang</b>          | PRC   | Improved variety    | Peach     | Round | Yellow | Acid     | Single | Showy     | Clingstone | Non-melting |
| <b>Lin Bai 10#</b>         | PRC   | Edible landrace     | Peach     | Round | White  | Acid     | Single | Showy     | Clingstone | Non-melting |
| <b>Lin Bai 3#</b>          | PRC   | Edible landrace     | Peach     | Round | White  | Non-acid | Single | Showy     | Clingstone | Non-melting |
| <b>Lin Huang 1#</b>        | PRC   | Edible landrace     | Peach     | Round | Yellow | Acid     | Single | Showy     | Clingstone | Melting     |

|                          |       |                     |           |       |        |          |        |           |            |             |
|--------------------------|-------|---------------------|-----------|-------|--------|----------|--------|-----------|------------|-------------|
| <b>Lin Huang 9#</b>      | PRC   | Edible landrace     | Peach     | Round | Yellow | Acid     | Single | Showy     | Clingstone | Non-melting |
| <b>Lincheng Tao</b>      | PRC   | Edible landrace     | Peach     | Round | White  | Acid     | Single | Showy     | Clingstone | Melting     |
| <b>Liquan 54#</b>        | PRC   | Improved variety    | Peach     | Round | White  | Non-acid | Single | Showy     | Clingstone | Melting     |
| <b>Liu Yue Bai</b>       | PRC   | Edible landrace     | Peach     | Round | White  | Non-acid | Single | Showy     | Freestone  | Melting     |
| <b>Liu Yue Kong</b>      | PRC   | Edible landrace     | Peach     | Round | White  | Non-acid | Single | Showy     | Freestone  | Melting     |
| <b>Long 2-4-6</b>        | PRC   | Edible landrace     | Peach     | Round | Yellow | Acid     | Single | Showy     | Clingstone | Non-melting |
| <b>Long You Pan Tao</b>  | PRC   | Edible landrace     | Nectarine | Flat  | Yellow | Acid     | Single | Showy     | Clingstone | Melting     |
| <b>Longhua Shui Mi</b>   | PRC   | Edible landrace     | Peach     | Round | White  | Non-acid | Single | Showy     | Clingstone | Melting     |
| <b>Lu Xiang</b>          | PRC   | Improved variety    | Peach     | Round | Yellow | Acid     | Single | Showy     | Freestone  | Melting     |
| <b>Lulin Shui Mi</b>     | PRC   | Edible landrace     | Peach     | Round | White  | Non-acid | Single | Showy     | Freestone  | Melting     |
| <b>Mai Xiang</b>         | PRC   | Improved variety    | Peach     | Round | White  | Acid     | Single | Showy     | Clingstone | Melting     |
| <b>Man Tian Hong</b>     | PRC   | Ornamental landrace | Peach     | Round | White  | Non-acid | Double | Showy     | Clingstone | Melting     |
| <b>Maoshan Gong Tao</b>  | PRC   | Edible landrace     | Peach     | Round | White  | Non-acid | NA     | Showy     | Clingstone | Melting     |
| <b>Maravilha</b>         | USA   | Improved variety    | Peach     | Round | White  | Acid     | Single | Showy     | Freestone  | Melting     |
| <b>Marigold</b>          | USA   | Improved variety    | Peach     | Round | Yellow | Acid     | Single | Showy     | Freestone  | Melting     |
| <b>Matsumori</b>         | Japan | Improved variety    | Peach     | Round | White  | Non-acid | Single | Showy     | Clingstone | Melting     |
| <b>May Grand</b>         | USA   | Improved variety    | Nectarine | Round | Yellow | Acid     | Single | Showy     | Freestone  | Melting     |
| <b>Mayglo</b>            | USA   | Improved variety    | Nectarine | Round | Yellow | Acid     | Single | Showy     | Clingstone | Melting     |
| <b>Mcneely</b>           | USA   | Improved variety    | Peach     | Round | Yellow | Acid     | Single | Non-showy | Freestone  | Melting     |
| <b>Mei Guo Pan Tao</b>   | PRC   | Improved variety    | Peach     | Flat  | White  | Non-acid | Single | Showy     | Clingstone | Melting     |
| <b>Mei Xiang</b>         | PRC   | Improved variety    | Peach     | Round | White  | Non-acid | Single | Showy     | Clingstone | Melting     |
| <b>Mi Yang Shan</b>      | PRC   | Edible landrace     | Peach     | Round | White  | Non-acid | Single | Showy     | Freestone  | Melting     |
| <b>Moyu 8#</b>           | PRC   | Edible landrace     | Peach     | Round | Yellow | Acid     | Single | Showy     | Clingstone | Melting     |
| <b>Nan Fang Zao Hong</b> | PRC   | Improved variety    | Nectarine | Round | White  | Non-acid | Single | Showy     | Clingstone | Melting     |
| <b>Nanshan 1#</b>        | PRC   | Edible landrace     | Peach     | Round | Yellow | Non-acid | Single | Showy     | Clingstone | Non-melting |
| <b>Nemaguard</b>         | USA   | Improved variety    | Peach     | Round | White  | Acid     | Single | Showy     | Clingstone | Melting     |

|                                |       |                  |           |       |        |          |        |           |            |             |
|--------------------------------|-------|------------------|-----------|-------|--------|----------|--------|-----------|------------|-------------|
| <b>NJ271</b>                   | USA   | Improved variety | Peach     | Round | Yellow | Non-acid | Double | NA        | Freestone  | Melting     |
| <b>NJC105</b>                  | USA   | Improved variety | Peach     | Round | Yellow | Acid     | Single | Non-showy | Clingstone | Non-melting |
| <b>NJC47</b>                   | USA   | Improved variety | Peach     | Round | Yellow | Acid     | Single | Non-showy | Clingstone | Non-melting |
| <b>NJF10</b>                   | USA   | Improved variety | Peach     | Flat  | Yellow | Acid     | Single | Showy     | Freestone  | Melting     |
| <b>NJF7</b>                    | USA   | Improved variety | Peach     | Flat  | White  | Non-acid | Single | Showy     | Clingstone | Melting     |
| <b>Norman</b>                  | USA   | Improved variety | Peach     | Round | Yellow | Acid     | Single | Showy     | Freestone  | Melting     |
| <b>Nunome Wase</b>             | Japan | Improved variety | Peach     | Round | White  | Non-acid | Single | Showy     | Freestone  | Melting     |
| <b>Okayama 11#</b>             | Japan | Improved variety | Peach     | Round | White  | Acid     | Single | Showy     | Clingstone | Melting     |
| <b>Okayama 3#</b>              | Japan | Improved variety | Peach     | Round | White  | Non-acid | Single | Showy     | Clingstone | Melting     |
| <b>Okayama Wase</b>            | Japan | Improved variety | Peach     | Round | White  | Non-acid | Single | Showy     | Freestone  | Melting     |
| <b>Okinawa</b>                 | USA   | Improved variety | Peach     | Round | White  | Acid     | Single | Showy     | Freestone  | Melting     |
| <b>Pan Tao Huang Hou</b>       | PRC   | Improved variety | Peach     | Flat  | White  | Non-acid | Single | Showy     | Clingstone | Melting     |
| <b>Pan Tao Wang</b>            | PRC   | Improved variety | Peach     | Flat  | White  | Non-acid | Single | Showy     | Clingstone | Melting     |
| <b>Ping Ding Mao Pan Tao</b>   | PRC   | Edible landrace  | Peach     | Flat  | White  | Acid     | Single | Showy     | Freestone  | Melting     |
| <b>Ping Yong Tao</b>           | PRC   | Edible landrace  | Peach     | Round | White  | Acid     | Single | Showy     | Freestone  | Melting     |
| <b>Qi Tao</b>                  | PRC   | Edible landrace  | Peach     | Round | White  | Acid     | Single | Showy     | Clingstone | Melting     |
| <b>Qian Nian Hong</b>          | PRC   | Improved variety | Nectarine | Round | Yellow | Non-acid | Single | Showy     | Clingstone | Melting     |
| <b>Qin Guang</b>               | PRC   | Improved variety | Nectarine | Round | White  | Non-acid | Single | Showy     | Freestone  | Melting     |
| <b>Qin Guang 2#</b>            | PRC   | Improved variety | Nectarine | Round | White  | Non-acid | Single | Showy     | Freestone  | Melting     |
| <b>Qin Wang</b>                | PRC   | Improved variety | Peach     | Round | White  | Non-acid | Single | Showy     | Clingstone | Melting     |
| <b>Qinan 2#</b>                | PRC   | Improved variety | Peach     | Round | White  | Non-acid | Single | Showy     | Clingstone | Melting     |
| <b>Qing Feng</b>               | PRC   | Improved variety | Peach     | Round | White  | Non-acid | Single | Showy     | Clingstone | Melting     |
| <b>Qing Mao Zi Bai Hua</b>     | PRC   | Edible landrace  | Peach     | Round | White  | Non-acid | Single | Showy     | Freestone  | Melting     |
| <b>Qingzhou Hong Pi Mi Tao</b> | PRC   | Edible landrace  | Peach     | Round | White  | Non-acid | Single | Showy     | Freestone  | Melting     |
| <b>Qinling Dong Tao</b>        | PRC   | Edible landrace  | Peach     | Round | White  | Acid     | Single | Showy     | Freestone  | Melting     |
| <b>Qiu Bai Tao</b>             | PRC   | Edible landrace  | Peach     | Round | White  | Acid     | Single | Showy     | Clingstone | Melting     |

|                               |       |                     |           |       |        |          |        |           |            |         |
|-------------------------------|-------|---------------------|-----------|-------|--------|----------|--------|-----------|------------|---------|
| <b>Qiu Xiang</b>              | PRC   | Improved variety    | Peach     | Round | White  | Non-acid | Single | Showy     | Clingstone | Melting |
| <b>Qiu Xiang Mi</b>           | PRC   | Improved variety    | Peach     | Round | White  | Non-acid | Single | Showy     | Clingstone | Melting |
| <b>Red Diamond</b>            | USA   | Improved variety    | Nectarine | Round | Yellow | Acid     | Single | Non-showy | Clingstone | Melting |
| <b>Regina</b>                 | USA   | Improved variety    | Peach     | Round | Yellow | Acid     | Single | Non-showy | Freestone  | Melting |
| <b>Reliance</b>               | USA   | Improved variety    | Peach     | Round | Yellow | Acid     | Single | Non-showy | Freestone  | Melting |
| <b>Ren Mian Tao</b>           | PRC   | Ornamental landrace | Peach     | Round | White  | Acid     | Double | NA        | Freestone  | Melting |
| <b>Ri Ben Hong Tian Tao</b>   | Japan | Improved variety    | Peach     | Round | White  | Non-acid | Single | Showy     | Freestone  | Melting |
| <b>Robin</b>                  | USA   | Improved variety    | Peach     | Round | White  | Non-acid | Single | Showy     | Freestone  | Melting |
| <b>Rose prince</b>            | USA   | Improved variety    | Nectarine | Round | White  | Acid     | Single | Showy     | Freestone  | Melting |
| <b>Rui Guang 18#</b>          | PRC   | Improved variety    | Nectarine | Round | Yellow | Non-acid | Single | Showy     | Clingstone | Melting |
| <b>Rui Guang 19#</b>          | PRC   | Improved variety    | Nectarine | Round | White  | Non-acid | Single | Showy     | Freestone  | Melting |
| <b>Rui Pan 2#</b>             | PRC   | Improved variety    | Peach     | Flat  | White  | Non-acid | Single | Showy     | Clingstone | Melting |
| <b>Rui Pan 4#</b>             | PRC   | Improved variety    | Peach     | Flat  | White  | Non-acid | Single | Showy     | Clingstone | Melting |
| <b>Rutgers Redleaf</b>        | USA   | Improved variety    | Peach     | Round | White  | Acid     | Single | Showy     | Freestone  | Melting |
| <b>Saotome</b>                | Japan | Improved variety    | Peach     | Round | White  | Non-acid | Single | Showy     | Clingstone | Melting |
| <b>Saturn</b>                 | USA   | Improved variety    | Peach     | Flat  | White  | Non-acid | Single | Showy     | Freestone  | Melting |
| <b>S-B</b>                    | PRC   | Edible landrace     | Peach     | Round | White  | Acid     | Single | Showy     | Clingstone | Melting |
| <b>September free</b>         | USA   | Improved variety    | Nectarine | Round | Yellow | Acid     | Single | Showy     | Freestone  | Melting |
| <b>Sha Hong Tao</b>           | PRC   | Edible landrace     | Peach     | Round | White  | Non-acid | Single | Showy     | Clingstone | Melting |
| <b>Sha Ji 2#</b>              | PRC   | Improved variety    | Peach     | Round | White  | Non-acid | Single | Showy     | Clingstone | Melting |
| <b>Shangshan Da Yu Lu</b>     | PRC   | Edible landrace     | Peach     | Round | White  | Non-acid | Single | Showy     | Clingstone | Melting |
| <b>Shenzhou Bai Mi</b>        | PRC   | Edible landrace     | Peach     | Round | White  | Non-acid | Single | Showy     | Clingstone | Melting |
| <b>Shenzhou Li He Shui Mi</b> | PRC   | Edible landrace     | Peach     | Round | White  | Non-acid | Single | Showy     | Freestone  | Melting |
| <b>Shi Sheng 3#</b>           | Japan | Improved variety    | Peach     | Round | White  | Non-acid | Single | Showy     | Freestone  | Melting |
| <b>Shi Tao</b>                | PRC   | Edible landrace     | Peach     | Round | White  | Acid     | Single | Showy     | Freestone  | Melting |
| <b>Shou Fen</b>               | PRC   | Ornamental landrace | Peach     | Round | White  | Acid     | Double | Showy     | Clingstone | Melting |

|                        |             |                     |           |       |        |          |        |           |            |             |
|------------------------|-------------|---------------------|-----------|-------|--------|----------|--------|-----------|------------|-------------|
| <b>Shuho</b>           | Japan       | Improved variety    | Nectarine | Round | Yellow | Acid     | Single | Showy     | Clingstone | Non-melting |
| <b>Silver Gem</b>      | USA         | Improved variety    | Nectarine | Round | White  | Acid     | Single | Showy     | Freestone  | Melting     |
| <b>Sirlo</b>           | USA         | Improved variety    | Nectarine | Round | Yellow | Acid     | Single | Showy     | Freestone  | Melting     |
| <b>Southern pearl</b>  | USA         | Improved variety    | Peach     | Round | White  | Acid     | Single | Showy     | Freestone  | Melting     |
| <b>Spring baby</b>     | USA         | Improved variety    | Peach     | Round | White  | Acid     | Single | Showy     | Clingstone | Non-melting |
| <b>Spring Crest</b>    | USA         | Improved variety    | Peach     | Round | Yellow | Acid     | NA     | NA        | Clingstone | Melting     |
| <b>Spring gold</b>     | USA         | Improved variety    | Peach     | Round | Yellow | Acid     | Single | Showy     | Freestone  | Melting     |
| <b>Spring prince</b>   | USA         | Improved variety    | Peach     | Round | Yellow | Acid     | Single | Showy     | Clingstone | Melting     |
| <b>Springtime</b>      | USA         | Improved variety    | Peach     | Round | White  | Acid     | Single | Non-showy | Clingstone | Melting     |
| <b>Su Lian Pan Tao</b> | Soviet      | Improved variety    | Peach     | Flat  | White  | Non-acid | Single | Showy     | Freestone  | Melting     |
| <b>Suan Li Guang</b>   | PRC         | Edible landrace     | Nectarine | Round | White  | Acid     | Single | Showy     | Freestone  | Melting     |
| <b>Summergrand</b>     | USA         | Improved variety    | Nectarine | Round | Yellow | Acid     | Single | Showy     | Freestone  | Melting     |
| <b>Summerset</b>       | USA         | Improved variety    | Peach     | Round | Yellow | Acid     | Single | Non-showy | Freestone  | Melting     |
| <b>Sunago Wase</b>     | Japan       | Improved variety    | Peach     | Round | White  | Non-acid | Single | Showy     | Clingstone | Melting     |
| <b>Sunblaze</b>        | USA         | Improved variety    | Nectarine | Round | Yellow | Acid     | Single | Non-showy | Freestone  | Melting     |
| <b>Sundollar</b>       | USA         | Improved variety    | Nectarine | Round | Yellow | Acid     | Single | Showy     | Clingstone | Melting     |
| <b>Sunraycer</b>       | USA         | Improved variety    | Nectarine | Round | Yellow | Acid     | Single | Non-showy | Freestone  | Melting     |
| <b>Sunsplash</b>       | USA         | Improved variety    | Nectarine | Round | Yellow | Acid     | Single | Showy     | Clingstone | Melting     |
| <b>Tachibana Wase</b>  | Japan       | Improved variety    | Peach     | Round | White  | Acid     | Single | Showy     | Freestone  | Melting     |
| <b>Tai Bai</b>         | PRC         | Edible landrace     | Peach     | Round | White  | Non-acid | Single | Showy     | Clingstone | Melting     |
| <b>Taiyuan Shui Mi</b> | PRC         | Edible landrace     | Peach     | Round | White  | Non-acid | Single | Showy     | Clingstone | Melting     |
| <b>Tan Chun</b>        | PRC         | Ornamental landrace | Peach     | Round | NA     | NA       | Double | Showy     | NA         | NA          |
| <b>Tian Hong</b>       | South Korea | Improved variety    | Nectarine | Round | Yellow | Acid     | Single | Showy     | Freestone  | Melting     |
| <b>Tian Li Guang</b>   | PRC         | Edible landrace     | Nectarine | Round | White  | Acid     | Single | Showy     | Freestone  | Melting     |
| <b>Tie 4-1</b>         | PRC         | Edible landrace     | Peach     | Round | Yellow | Acid     | Single | Showy     | Freestone  | Melting     |
| <b>Trinmph</b>         | USA         | Improved variety    | Peach     | Round | Yellow | Acid     | Single | Showy     | Freestone  | Melting     |

|                           |       |                     |           |       |        |          |        |       |            |             |
|---------------------------|-------|---------------------|-----------|-------|--------|----------|--------|-------|------------|-------------|
| <b>Tsukuba 85#</b>        | Japan | Improved variety    | Peach     | Round | White  | Non-acid | Single | Showy | Clingstone | Melting     |
| <b>Tsukuba 86#</b>        | Japan | Improved variety    | Peach     | Round | White  | Non-acid | Single | Showy | Clingstone | Melting     |
| <b>Tu-2</b>               | PRC   | Edible landrace     | Peach     | Round | Yellow | Acid     | Single | Showy | Clingstone | Non-melting |
| <b>Tugou 1#</b>           | PRC   | Edible landrace     | Peach     | Round | Yellow | Acid     | Single | Showy | Clingstone | Non-melting |
| <b>Wan Bai Hua</b>        | PRC   | Improved variety    | Peach     | Round | White  | Non-acid | Single | Showy | Clingstone | Melting     |
| <b>Wan Bai Mi</b>         | PRC   | Improved variety    | Peach     | Round | White  | Non-acid | Single | Showy | Clingstone | Melting     |
| <b>Wan Huang Jin</b>      | Japan | Improved variety    | Peach     | Round | Yellow | Non-acid | Single | Showy | Clingstone | Melting     |
| <b>Wan Pan Tao</b>        | PRC   | Edible landrace     | Peach     | Flat  | White  | Non-acid | Single | Showy | Clingstone | Melting     |
| <b>Wangmo Xiao Mi Tao</b> | PRC   | Edible landrace     | Peach     | Round | White  | Non-acid | Single | Showy | Freestone  | Melting     |
| <b>Wanzhou Huang Tao</b>  | PRC   | Edible landrace     | Peach     | Round | NA     | NA       | NA     | NA    | NA         | NA          |
| <b>Wanzhou Xiang Tao</b>  | PRC   | Edible landrace     | Peach     | Round | NA     | NA       | Single | NA    | NA         | NA          |
| <b>Wasesimizu</b>         | Japan | Improved variety    | Peach     | Round | White  | Acid     | Single | Showy | Clingstone | Melting     |
| <b>Wei Yang 2#</b>        | PRC   | Improved variety    | Peach     | Round | White  | Non-acid | Single | Showy | Clingstone | Melting     |
| <b>Weinberger</b>         | Italy | Improved variety    | Nectarine | Round | Yellow | Acid     | Single | Showy | Freestone  | Melting     |
| <b>Wenzhou Shui Mi</b>    | PRC   | Edible landrace     | Peach     | Round | White  | Non-acid | Single | Showy | Clingstone | Melting     |
| <b>Wu Bao Tao</b>         | PRC   | Ornamental landrace | Peach     | Round | NA     | NA       | Double | NA    | NA         | NA          |
| <b>Wu Da Tao</b>          | PRC   | Edible landrace     | Peach     | Round | White  | Acid     | Single | Showy | Freestone  | Melting     |
| <b>Wu Yue Bai</b>         | PRC   | Edible landrace     | Peach     | Round | White  | Non-acid | Single | Showy | Clingstone | Melting     |
| <b>Wu Yue Jin</b>         | PRC   | Improved variety    | Peach     | Round | Yellow | Non-acid | Single | Showy | Clingstone | Melting     |
| <b>Wuhan Da Hong Pao</b>  | PRC   | Edible landrace     | Peach     | Round | White  | Non-acid | Single | Showy | Freestone  | Melting     |
| <b>Xi Jiao 1#</b>         | PRC   | Edible landrace     | Peach     | Round | Yellow | Acid     | Single | Showy | Clingstone | Non-melting |
| <b>Xi Jiao 2#</b>         | PRC   | Edible landrace     | Peach     | Round | Yellow | Non-acid | Single | Showy | Clingstone | Non-melting |
| <b>Xi Jiao 3#</b>         | PRC   | Edible landrace     | Peach     | Round | White  | Acid     | Single | Showy | Freestone  | Melting     |
| <b>Xi Mei 1#</b>          | PRC   | Improved variety    | Peach     | Round | White  | Acid     | Single | Showy | Freestone  | Melting     |
| <b>Xi Mei 2#</b>          | PRC   | Improved variety    | Peach     | Round | White  | Acid     | Single | Showy | Freestone  | Melting     |
| <b>Xi Nong 18#</b>        | PRC   | Improved variety    | Peach     | Round | White  | Acid     | Single | Showy | Freestone  | Melting     |

|                               |             |                     |           |       |        |          |        |           |            |         |
|-------------------------------|-------------|---------------------|-----------|-------|--------|----------|--------|-----------|------------|---------|
| <b>Xi Nong 19#</b>            | PRC         | Improved variety    | Peach     | Round | White  | Acid     | Single | Showy     | Freestone  | Melting |
| <b>Xi Nong Shui Mi</b>        | PRC         | Improved variety    | Peach     | Round | White  | Acid     | Single | Showy     | Clingstone | Melting |
| <b>Xi Nong Xia Mi</b>         | PRC         | Improved variety    | Peach     | Round | White  | Non-acid | Single | Showy     | Clingstone | Melting |
| <b>Xi Nong Zao Mi</b>         | PRC         | Improved variety    | Peach     | Round | White  | Acid     | Single | Showy     | Clingstone | Melting |
| <b>Xi Wei Gold</b>            | South Korea | Improved variety    | Peach     | Round | Yellow | Non-acid | Single | Showy     | Clingstone | Melting |
| <b>Xia Hui 1#</b>             | PRC         | Improved variety    | Peach     | Round | White  | Non-acid | Single | Showy     | Clingstone | Melting |
| <b>Xiang Jiao Tao</b>         | PRC         | Edible landrace     | Peach     | Round | Yellow | Non-acid | Single | Showy     | Freestone  | Melting |
| <b>Xiao Bai Tao</b>           | PRC         | Edible landrace     | Peach     | Round | White  | Non-acid | Single | Showy     | Freestone  | Melting |
| <b>Xiao Hong Hua</b>          | PRC         | Edible landrace     | Peach     | Round | White  | Non-acid | Single | Showy     | Clingstone | Melting |
| <b>Xiao Jin Dan</b>           | PRC         | Edible landrace     | Peach     | Round | White  | Non-acid | Single | Showy     | Freestone  | Melting |
| <b>Xiboliya C</b>             | Canada      | Improved variety    | Peach     | Round | White  | Acid     | Single | Showy     | Freestone  | Melting |
| <b>Xin Bai Hua</b>            | PRC         | Improved variety    | Peach     | Round | White  | Non-acid | Single | Showy     | Clingstone | Melting |
| <b>Xin Hong Zao Pan Tao</b>   | PRC         | Improved variety    | Peach     | Flat  | White  | Acid     | Single | Showy     | Freestone  | Melting |
| <b>Xiu Yu</b>                 | PRC         | Improved variety    | Nectarine | Round | White  | Non-acid | Single | Showy     | Clingstone | Melting |
| <b>Xuancheng Tian Tao</b>     | PRC         | Improved variety    | Peach     | Round | White  | Non-acid | Single | Showy     | Freestone  | Melting |
| <b>Yan Guang</b>              | PRC         | Improved variety    | Nectarine | Round | White  | Non-acid | Single | Non-showy | Clingstone | Melting |
| <b>Yang Tao</b>               | PRC         | Edible landrace     | Peach     | Round | White  | Non-acid | Single | Showy     | Clingstone | Melting |
| <b>Yangquan Rou Tao</b>       | PRC         | Edible landrace     | Peach     | Round | White  | Non-acid | Single | Showy     | Clingstone | Melting |
| <b>Yangzhou 40#</b>           | PRC         | Improved variety    | Peach     | Round | Yellow | Non-acid | Single | Showy     | Clingstone | Melting |
| <b>Yexian Dong Tao</b>        | PRC         | Edible landrace     | Peach     | Round | White  | Non-acid | Single | Showy     | Freestone  | Melting |
| <b>Yexian Huang Rou Tao</b>   | PRC         | Edible landrace     | Peach     | Round | Yellow | Acid     | Single | Showy     | Clingstone | Melting |
| <b>Yi Xian Hong</b>           | PRC         | Edible landrace     | Peach     | Round | White  | Non-acid | Single | Showy     | Freestone  | Melting |
| <b>Yilixian Huang Rou Tao</b> | PRC         | Edible landrace     | Peach     | Round | Yellow | Acid     | Single | Showy     | Freestone  | Melting |
| <b>Ying Chun</b>              | PRC         | Ornamental landrace | Peach     | Round | White  | Acid     | Double | Showy     | Clingstone | Melting |
| <b>You Ming Bai Tao</b>       | South Korea | Improved variety    | Peach     | Round | White  | Non-acid | Single | Showy     | Clingstone | Melting |
| <b>Yu Hua Lu</b>              | PRC         | Improved variety    | Peach     | Round | White  | Non-acid | Single | Showy     | Freestone  | Melting |



|                          |     |                     |           |       |        |          |        |           |            |             |
|--------------------------|-----|---------------------|-----------|-------|--------|----------|--------|-----------|------------|-------------|
| <b>Yu Lu</b>             | PRC | Improved variety    | Peach     | Round | White  | Non-acid | Single | Showy     | Clingstone | Melting     |
| <b>Yu Lu Pan Tao</b>     | PRC | Edible landrace     | Peach     | Flat  | White  | Non-acid | Single | Showy     | Clingstone | Melting     |
| <b>Yu Tian</b>           | PRC | Improved variety    | Peach     | Round | White  | Non-acid | Single | Showy     | Freestone  | Melting     |
| <b>Yuan Chun</b>         | PRC | Ornamental landrace | Peach     | Round | White  | Non-acid | Double | Showy     | Clingstone | Melting     |
| <b>Yuan Dong Bai Tao</b> | PRC | Improved variety    | Peach     | Round | White  | Non-acid | Single | Showy     | Freestone  | Melting     |
| <b>Yun Shu 2#</b>        | PRC | Improved variety    | Peach     | Round | White  | Non-acid | Single | Showy     | Clingstone | Melting     |
| <b>Zao Bai Feng</b>      | PRC | Improved variety    | Peach     | Round | White  | Non-acid | Single | Showy     | Freestone  | Melting     |
| <b>Zao Chun Tao</b>      | PRC | Edible landrace     | Peach     | Round | White  | Acid     | Single | Showy     | Clingstone | Melting     |
| <b>Zao Feng</b>          | PRC | Improved variety    | Peach     | Round | White  | Non-acid | Single | Showy     | Clingstone | Melting     |
| <b>Zao Hong Xia</b>      | PRC | Improved variety    | Nectarine | Round | White  | Non-acid | Single | Showy     | Clingstone | Melting     |
| <b>Zao Hong Yan</b>      | PRC | Improved variety    | Nectarine | Round | White  | Non-acid | Single | Showy     | Freestone  | Melting     |
| <b>Zao Hong Zhu</b>      | PRC | Improved variety    | Nectarine | Round | White  | Non-acid | Single | Non-showy | Clingstone | Melting     |
| <b>Zao Huang Jin</b>     | PRC | Edible landrace     | Peach     | Round | Yellow | Acid     | Single | Showy     | Freestone  | Melting     |
| <b>Zao Jiu Bao</b>       | PRC | Improved variety    | Peach     | Round | White  | Non-acid | Single | Showy     | Freestone  | Melting     |
| <b>Zao Kui</b>           | PRC | Improved variety    | Peach     | Round | White  | Non-acid | Single | Showy     | Clingstone | Melting     |
| <b>Zao Kui Mi</b>        | PRC | Improved variety    | Peach     | Flat  | White  | Non-acid | Single | Showy     | Clingstone | Melting     |
| <b>Zao Lu Pan Tao</b>    | PRC | Improved variety    | Peach     | Flat  | White  | Non-acid | Single | Showy     | Clingstone | Melting     |
| <b>Zao Mei</b>           | PRC | Improved variety    | Peach     | Round | White  | Non-acid | Single | Showy     | Clingstone | Melting     |
| <b>Zao Tian Tao</b>      | PRC | Improved variety    | Peach     | Round | White  | Non-acid | Single | Showy     | Clingstone | Melting     |
| <b>Zao Xia Lu</b>        | PRC | Improved variety    | Peach     | Round | White  | Non-acid | Single | Showy     | Freestone  | Melting     |
| <b>Zao Yan</b>           | PRC | Improved variety    | Peach     | Round | White  | Non-acid | Single | Showy     | Freestone  | Melting     |
| <b>Zhang Bai 2#</b>      | PRC | Edible landrace     | Peach     | Round | White  | Acid     | Single | Showy     | Clingstone | Non-melting |
| <b>Zhang Bai 5#</b>      | PRC | Edible landrace     | Peach     | Round | White  | Non-acid | Single | Showy     | Clingstone | Non-melting |
| <b>Zhang Bai Gan</b>     | PRC | Edible landrace     | Peach     | Round | White  | Acid     | Single | Showy     | Clingstone | Non-melting |
| <b>Zhang Huang 9#</b>    | PRC | Edible landrace     | Peach     | Round | Yellow | Acid     | Single | Showy     | Clingstone | Non-melting |
| <b>Zhao Hui</b>          | PRC | Improved variety    | Peach     | Round | White  | Non-acid | Single | Showy     | Clingstone | Melting     |

|                             |       |                  |           |       |        |          |        |           |            |             |
|-----------------------------|-------|------------------|-----------|-------|--------|----------|--------|-----------|------------|-------------|
| <b>Zhen Zhu Hong</b>        | PRC   | Improved variety | Nectarine | Round | White  | Acid     | Single | Non-showy | Clingstone | Melting     |
| <b>Zheng Huang 2#</b>       | PRC   | Improved variety | Peach     | Round | Yellow | Acid     | Single | Showy     | Clingstone | Non-melting |
| <b>Zheng Huang 3#</b>       | PRC   | Improved variety | Peach     | Round | Yellow | Acid     | Single | Showy     | Clingstone | Non-melting |
| <b>Zheng Huang 4#</b>       | PRC   | Improved variety | Peach     | Round | Yellow | Acid     | Single | Showy     | Clingstone | Non-melting |
| <b>Zhong You 7#</b>         | PRC   | Improved variety | Nectarine | Round | NA     | NA       | Single | Non-showy | NA         | NA          |
| <b>Zhong You 8#</b>         | PRC   | Improved variety | Nectarine | Round | Yellow | Non-acid | Single | Non-showy | Clingstone | Melting     |
| <b>Zhong You Pan Tao 1#</b> | PRC   | Improved variety | Nectarine | Flat  | White  | Non-acid | Single | Non-showy | Clingstone | Melting     |
| <b>Zhu Bo 2#</b>            | Japan | Improved variety | Peach     | Round | White  | Acid     | Single | Showy     | Freestone  | Melting     |
| <b>Zhu Bo 3#</b>            | Japan | Improved variety | Peach     | Round | White  | Acid     | Single | Showy     | Freestone  | Melting     |
| <b>Zhu Bo 88#</b>           | Japan | Improved variety | Peach     | Round | White  | Non-acid | Single | Non-showy | Clingstone | Melting     |
| <b>Zhu Bo 89#</b>           | Japan | Improved variety | Peach     | Round | White  | Acid     | Single | Showy     | Clingstone | Melting     |
| <b>Zi Rou Tao</b>           | PRC   | Improved variety | Nectarine | Round | Yellow | Acid     | Single | Showy     | Freestone  | Melting     |

182 **Supplementary Table 10: Significant association results for selected SNPs using**  
 183 **Sequenom MassARRAY data in 345 peach accessions.**

| Trait                       | GLM            | Associated SNP using GLM (no PCA), GLM (PCA) or MLM model | -Log <sub>10</sub> (p) |
|-----------------------------|----------------|-----------------------------------------------------------|------------------------|
| <b>Flower shape-DoubleF</b> | Chr2: 21480531 | GLM (no PCA), GLM (PCA)                                   | 20.64                  |
|                             | Chr6: 17602373 | MLM                                                       | 31.95                  |
|                             | Chr8: 4862362  | MLM                                                       | 8.97                   |
|                             | Chr2: 15719828 | MLM                                                       | NA                     |
| <b>Flower shape-showyF</b>  | Chr8: 13740117 | GLM (no PCA), GLM (PCA), MLM                              | 121.47                 |
|                             | Chr8: 16687764 | GLM (no PCA)                                              | 2.3                    |
|                             | Chr8: 16746058 | GLM (no PCA), GLM (PCA)                                   | 1.5                    |
|                             | Chr8: 16807476 | GLM (PCA)                                                 | 2.64                   |
|                             | Chr7: 21584843 | MLM                                                       | 7.57                   |
| <b>Fruit flesh color</b>    | Chr1: 24820676 | GLM (no PCA)                                              | 21.24                  |
|                             | Chr1: 24968892 | GLM (PCA), MLM                                            | 25.43                  |
|                             | Chr1: 24863116 | GLM (PCA), MLM                                            | 21.51                  |
| <b>Fruit hairiness</b>      | Chr5: 18238151 | GLM (no PCA), GLM (PCA), MLM                              | 32.04                  |
|                             | Chr5: 17576893 | GLM (no PCA), GLM (PCA)                                   | 121.92                 |
|                             | Chr5: 16646429 | GLM (no PCA), GLM (PCA), MLM                              | 98.34                  |
|                             | Chr7: 3304942  | MLM                                                       | 5.23                   |
| <b>Fruit shape</b>          | Chr6: 25060196 | GLM (no PCA), GLM (PCA), MLM                              | 182.72                 |
|                             | Chr6: 27109034 | GLM (no PCA), GLM (PCA), MLM                              | 73.10                  |
|                             | Chr6: 25142326 | GLM (no PCA), GLM (PCA), MLM                              | 48.86                  |
| <b>Non-acid fruit</b>       | Chr5: 588359   | GLM, GLM (PCA)                                            | 51.57                  |
|                             | Chr5: 628407   | MLM                                                       | 62.47                  |
|                             | Chr5: 996915   | GLM (no PCA), GLM (PCA)                                   | 70.75                  |
|                             | Chr5: 764830   | GLM (no PCA), MLM                                         | 58.02                  |
|                             | Chr5: 541075   | GLM (PCA)                                                 | 89.42                  |

184

185 **Supplementary Table 11: Significant association results for soluble solid content**  
 186 **and fruit weight in 129 peach accessions using MLM model.**

| Trait                 | Loci       | Years | Chr.     | Position | -log <sub>10</sub> (p) |
|-----------------------|------------|-------|----------|----------|------------------------|
| Fruit weight          | FW-2007-1  | 2007  | 1        | 43205141 | 6.26                   |
|                       | FW-2007-2  | 2007  | 2        | 16609769 | 6.74                   |
|                       | FW-2007-3  | 2007  | 3        | 6338918  | 5.97                   |
|                       | FW-2007-4  | 2007  | 4        | 10990743 | 7.14                   |
|                       | FW-2007-5  | 2007  | 5        | 4949487  | 6.30                   |
|                       | FW-2007-6  | 2007  | 5        | 13892312 | 5.96                   |
|                       | FW-2007-7  | 2007  | 5        | 15928967 | 6.21                   |
|                       | FW-2007-8  | 2007  | 6        | 13747142 | 6.07                   |
|                       | FW-2007-9  | 2007  | 7        | 14069835 | 6.17                   |
|                       | FW-2007-10 | 2007  | 8        | 168831   | 7.00                   |
|                       | FW-2010-1  | 2010  | 1        | 12392427 | 4.55                   |
|                       | FW-2010-2  | 2010  | 1        | 39241272 | 4.21                   |
|                       | FW-2010-3  | 2010  | 1        | 14050831 | 4.15                   |
|                       | FW-2010-4  | 2010  | 1        | 5879950  | 4.11                   |
|                       | FW-2010-5  | 2010  | 2        | 10388301 | 4.65                   |
|                       | FW-2010-6  | 2010  | 2        | 16602967 | 4.68                   |
|                       | FW-2010-7  | 2010  | 2        | 20032011 | 4.11                   |
|                       | FW-2010-8  | 2010  | 2        | 23069073 | 4.01                   |
|                       | FW-2010-9  | 2010  | 2        | 24271176 | 4.01                   |
|                       | FW-2010-10 | 2010  | 3        | 6281041  | 4.60                   |
|                       | FW-2010-11 | 2010  | 3        | 7768702  | 4.23                   |
|                       | FW-2010-12 | 2010  | 4        | 8634341  | 4.54                   |
|                       | FW-2010-13 | 2010  | 4        | 10888626 | 4.97                   |
| FW-2010-14            | 2010       | 4     | 13194190 | 4.63     |                        |
| FW-2010-15            | 2010       | 4     | 17625270 | 4.53     |                        |
| FW-2010-16            | 2010       | 4     | 20500702 | 4.23     |                        |
| FW-2010-17            | 2010       | 4     | 23281118 | 4.95     |                        |
| FW-2010-18            | 2010       | 4     | 29527539 | 4.38     |                        |
| FW-2010-19            | 2010       | 5     | 660217   | 4.45     |                        |
| FW-2010-20            | 2010       | 5     | 9432987  | 4.77     |                        |
| FW-2010-21            | 2010       | 6     | 20400960 | 4.10     |                        |
| FW-2010-22            | 2010       | 7     | 19291656 | 4.16     |                        |
| FW-2010-23            | 2010       | 8     | 18961633 | 4.09     |                        |
| Soluble solid content | SSC-2007-1 | 2007  | 1        | 15691351 | 4.02                   |
|                       | SSC-2007-2 | 2007  | 1        | 18146487 | 4.42                   |
|                       | SSC-2007-3 | 2007  | 1        | 20779945 | 4.42                   |
|                       | SSC-2007-4 | 2007  | 1        | 24175076 | 4.14                   |
|                       | SSC-2007-5 | 2007  | 2        | 20036936 | 4.13                   |
|                       | SSC-2007-6 | 2007  | 2        | 23174414 | 4.99                   |
|                       | SSC-2007-7 | 2007  | 2        | 25426115 | 4.32                   |

|                    |             |   |          |      |
|--------------------|-------------|---|----------|------|
| <b>SSC-2007-8</b>  | <b>2007</b> | 3 | 688273   | 4.17 |
| <b>SSC-2007-9</b>  | <b>2007</b> | 3 | 9101540  | 4.04 |
| <b>SSC-2007-10</b> | <b>2007</b> | 3 | 11022073 | 4.14 |
| <b>SSC-2007-11</b> | <b>2007</b> | 4 | 1968175  | 4.69 |
| <b>SSC-2007-12</b> | <b>2007</b> | 4 | 5478311  | 4.14 |
| <b>SSC-2007-13</b> | <b>2007</b> | 4 | 8873368  | 4.55 |
| <b>SSC-2007-14</b> | <b>2007</b> | 4 | 17057020 | 4.14 |
| <b>SSC-2007-15</b> | <b>2007</b> | 4 | 24462378 | 4.14 |
| <b>SSC-2007-16</b> | <b>2007</b> | 6 | 19782877 | 4.05 |
| <b>SSC-2007-17</b> | <b>2007</b> | 6 | 24180924 | 4.60 |
| <b>SSC-2007-18</b> | <b>2007</b> | 7 | 597258   | 5.03 |
| <b>SSC-2007-19</b> | <b>2007</b> | 7 | 2463182  | 4.12 |
| <b>SSC-2007-20</b> | <b>2007</b> | 8 | 15176331 | 4.14 |
| <b>SSC-2007-21</b> | <b>2007</b> | 8 | 18584579 | 4.03 |
| <b>SSC-2010-1</b>  | <b>2010</b> | 1 | 10477624 | 4.31 |
| <b>SSC-2010-2</b>  | <b>2010</b> | 7 | 19910443 | 4.23 |
| <b>SSC-2010-3</b>  | <b>2010</b> | 8 | 13010893 | 4.74 |

187

188 **Supplementary Table 12: Domestication and improvement sweep regions**  
189 **according to the polymorphisms identified in contiguous 50-kb windows across**  
190 **peach chromosomes.**

| Scaffold | Start point<br>(bp) | End point<br>(bp) | Sweep regions | Scaffold    | Start point<br>(bp) | End point<br>(bp) | Sweep regions |               |
|----------|---------------------|-------------------|---------------|-------------|---------------------|-------------------|---------------|---------------|
| 1        | 200001              | 250000            | Domestication | 4           | 8850001             | 8900000           | Domestication |               |
| 1        | 700001              | 850000            | Improvement   | 4           | 11000001            | 11050000          | Improvement   |               |
| 1        | 1000001             | 1050000           | Domestication | 4           | 11500001            | 11550000          | Domestication |               |
| 1        | 2450001             | 2500000           | Improvement   | 4           | 11750001            | 11850000          | Domestication |               |
| 1        | 5600001             | 5650000           | Domestication | 4           | 15600001            | 15650000          | Improvement   |               |
| 1        | 5950001             | 6100000           | Improvement   | 4           | 15850001            | 15900000          | Improvement   |               |
| 1        | 6400001             | 6450000           | Improvement   | 4           | 16800001            | 16850000          | Domestication |               |
| 1        | 6800001             | 6850000           | Improvement   | 4           | 17750001            | 17800000          | Domestication |               |
| 1        | 7200001             | 7250000           | Domestication | 4           | 18050001            | 18150000          | Improvement   |               |
| 1        | 7950001             | 8000000           | Domestication | 4           | 18200001            | 18250000          | Improvement   |               |
| 1        | 8050001             | 8100000           | Domestication | 4           | 20300001            | 20450000          | Domestication |               |
| 1        | 8150001             | 8200000           | Improvement   | 5           | 100001              | 200000            | Improvement   |               |
| 1        | 9100001             | 9150000           | Domestication | 5           | 1600001             | 1650000           | Improvement   |               |
| 1        | 9150001             | 9200000           | Domestication | Improvement | 5                   | 1800001           | 2000000       | Improvement   |
| 1        | 9450001             | 9500000           | Improvement   | 5           | 2300001             | 2500000           | Improvement   |               |
| 1        | 10400001            | 10450000          | Domestication | 5           | 2650001             | 2700000           | Improvement   |               |
| 1        | 10900001            | 10950000          | Improvement   | 5           | 2850001             | 2900000           | Improvement   |               |
| 1        | 11000001            | 11050000          | Improvement   | 5           | 3350001             | 3400000           | Domestication |               |
| 1        | 14400001            | 14700000          | Improvement   | 5           | 3850001             | 4050000           | Improvement   |               |
| 1        | 14750001            | 14800000          | Domestication | 5           | 4150001             | 4200000           | Improvement   |               |
| 1        | 16300001            | 16350000          | Domestication | 5           | 5400001             | 5450000           | Domestication |               |
| 1        | 16800001            | 16850000          | Improvement   | 5           | 7750001             | 7800000           | Domestication | Improvement   |
| 1        | 17350001            | 17750000          | Domestication | 5           | 7850001             | 7950000           | Improvement   |               |
| 1        | 17750001            | 17800000          | Domestication | Improvement | 5                   | 8000001           | 8050000       | Domestication |
| 1        | 17800001            | 18500000          | Domestication | 5           | 8800001             | 8850000           | Domestication |               |
| 1        | 22000001            | 22050000          | Domestication | 5           | 10750001            | 10850000          | Improvement   |               |
| 1        | 22650001            | 22800000          | Domestication | 5           | 12150001            | 12350000          | Domestication |               |
| 1        | 23750001            | 23800000          | Improvement   | 5           | 12450001            | 12500000          | Domestication |               |
| 1        | 24100001            | 24150000          | Domestication | 5           | 12550001            | 12600000          | Domestication |               |
| 1        | 25150001            | 25200000          | Improvement   | 5           | 12700001            | 12800000          | Improvement   |               |
| 1        | 25250001            | 25450000          | Improvement   | 5           | 13150001            | 13200000          | Domestication |               |
| 1        | 28800001            | 28850000          | Domestication | 5           | 13250001            | 13300000          | Improvement   |               |
| 1        | 28950001            | 29000000          | Domestication | 5           | 13750001            | 13800000          | Domestication |               |
| 1        | 29050001            | 29200000          | Domestication | 5           | 14650001            | 14700000          | Domestication |               |
| 1        | 30450001            | 30500000          | Improvement   | 5           | 14800001            | 14850000          | Domestication |               |
| 1        | 30650001            | 30700000          | Domestication | 5           | 14950001            | 15200000          | Improvement   |               |
| 1        | 30750001            | 30800000          | Domestication | 5           | 15250001            | 15350000          | Domestication | Improvement   |
| 1        | 31350001            | 31400000          | Domestication | 5           | 15550001            | 15600000          | Domestication | Improvement   |

|   |          |          |               |             |   |          |          |               |             |
|---|----------|----------|---------------|-------------|---|----------|----------|---------------|-------------|
| 1 | 31550001 | 31650000 |               | Improvement | 5 | 15700001 | 15800000 | Domestication |             |
| 1 | 32950001 | 33000000 | Domestication |             | 5 | 15800001 | 15850000 |               | Improvement |
| 1 | 33200001 | 33300000 | Domestication |             | 5 | 15900001 | 16050000 |               | Improvement |
| 1 | 34400001 | 34450000 | Domestication |             | 5 | 16100001 | 16200000 | Domestication |             |
| 1 | 35000001 | 35050000 | Domestication |             | 5 | 16200001 | 16250000 |               | Improvement |
| 1 | 35850001 | 35900000 | Domestication |             | 5 | 16300001 | 16400000 |               | Improvement |
| 1 | 36000001 | 36050000 | Domestication |             | 5 | 16400001 | 16450000 | Domestication | Improvement |
| 1 | 36150001 | 36250000 | Domestication |             | 5 | 16800001 | 16850000 |               | Improvement |
| 1 | 37650001 | 37700000 | Domestication |             | 5 | 17000001 | 17100000 |               | Improvement |
| 1 | 38150001 | 38350000 |               | Improvement | 5 | 17150001 | 17200000 | Domestication |             |
| 1 | 38350001 | 38400000 | Domestication | Improvement | 5 | 17300001 | 17350000 |               | Improvement |
| 1 | 38450001 | 38500000 |               | Improvement | 5 | 17400001 | 17500000 | Domestication |             |
| 1 | 39000001 | 39050000 |               | Improvement | 5 | 17550001 | 17600000 |               | Improvement |
| 1 | 39450001 | 39550000 |               | Improvement | 5 | 17600001 | 17750000 | Domestication |             |
| 1 | 39650001 | 39900000 |               | Improvement | 5 | 17750001 | 17800000 | Domestication | Improvement |
| 1 | 39900001 | 39950000 | Domestication | Improvement | 5 | 17800001 | 17850000 | Domestication |             |
| 1 | 39950001 | 40000000 |               | Improvement | 5 | 17900001 | 18000000 |               | Improvement |
| 1 | 40850001 | 40950000 | Domestication |             | 5 | 18050001 | 18100000 | Domestication | Improvement |
| 1 | 41050001 | 41100000 | Domestication |             | 5 | 18100001 | 18200000 | Domestication |             |
| 1 | 41100001 | 41150000 | Domestication | Improvement | 5 | 18250001 | 18300000 | Domestication | Improvement |
| 1 | 41150001 | 41500000 | Domestication |             | 5 | 18300001 | 18350000 | Domestication |             |
| 1 | 41500001 | 41550000 | Domestication | Improvement | 5 | 18350001 | 18450000 | Domestication | Improvement |
| 1 | 41550001 | 41700000 | Domestication |             | 6 | 2750001  | 2800000  | Domestication |             |
| 1 | 45000001 | 45050000 | Domestication |             | 6 | 4050001  | 4100000  | Domestication |             |
| 1 | 45300001 | 45350000 | Domestication |             | 6 | 4150001  | 4250000  | Domestication |             |
| 1 | 46000001 | 46050000 | Domestication |             | 6 | 4850001  | 4900000  |               | Improvement |
| 1 | 46150001 | 46200000 | Domestication |             | 6 | 4950001  | 5000000  | Domestication |             |
| 1 | 46350001 | 46400000 | Domestication |             | 6 | 5250001  | 5300000  |               | Improvement |
| 2 | 100001   | 150000   | Domestication |             | 6 | 5600001  | 5900000  |               | Improvement |
| 2 | 200001   | 250000   | Domestication |             | 6 | 6050001  | 6200000  |               | Improvement |
| 2 | 8950001  | 9050000  | Domestication |             | 6 | 6650001  | 6700000  | Domestication |             |
| 2 | 9700001  | 9800000  |               | Improvement | 6 | 6850001  | 6900000  |               | Improvement |
| 2 | 10250001 | 10300000 |               | Improvement | 6 | 7400001  | 7450000  | Domestication |             |
| 2 | 10400001 | 10550000 |               | Improvement | 6 | 8800001  | 8850000  | Domestication | Improvement |
| 2 | 11250001 | 11300000 |               | Improvement | 6 | 8850001  | 8900000  |               | Improvement |
| 2 | 11600001 | 11700000 |               | Improvement | 6 | 9700001  | 9900000  |               | Improvement |
| 2 | 12350001 | 12400000 |               | Improvement | 6 | 12800001 | 12850000 | Domestication |             |
| 2 | 15100001 | 15150000 |               | Improvement | 6 | 15900001 | 15950000 |               | Improvement |
| 2 | 15450001 | 15500000 | Domestication |             | 6 | 16100001 | 16250000 |               | Improvement |
| 2 | 15750001 | 15800000 | Domestication |             | 6 | 16300001 | 16400000 |               | Improvement |
| 2 | 16600001 | 16900000 |               | Improvement | 6 | 16750001 | 16800000 | Domestication |             |
| 2 | 16950001 | 17000000 | Domestication |             | 6 | 19850001 | 19900000 |               | Improvement |
| 2 | 22800001 | 22850000 | Domestication |             | 6 | 21250001 | 21400000 | Domestication |             |
| 2 | 23600001 | 23700000 | Domestication |             | 6 | 24550001 | 24600000 | Domestication | Improvement |



|   |          |          |               |             |   |          |          |               |             |
|---|----------|----------|---------------|-------------|---|----------|----------|---------------|-------------|
| 2 | 23750001 | 24000000 |               | Improvement | 6 | 28250001 | 28300000 | Domestication |             |
| 2 | 24050001 | 24100000 | Domestication |             | 6 | 28300001 | 28350000 | Domestication | Improvement |
| 2 | 24150001 | 24200000 | Domestication |             | 6 | 28400001 | 28450000 |               | Improvement |
| 2 | 24250001 | 24300000 |               | Improvement | 6 | 28550001 | 28900000 | Domestication |             |
| 2 | 25100001 | 25150000 | Domestication |             | 7 | 31500001 | 3200000  |               | Improvement |
| 2 | 25700001 | 25750000 | Domestication |             | 7 | 8800001  | 8850000  | Domestication |             |
| 2 | 26000001 | 26050000 |               | Improvement | 7 | 8950001  | 9050000  |               | Improvement |
| 3 | 1500001  | 1550000  | Domestication | Improvement | 7 | 12450001 | 12500000 | Domestication |             |
| 3 | 2100001  | 2150000  | Domestication |             | 7 | 13500001 | 13600000 | Domestication |             |
| 3 | 2850001  | 2900000  | Domestication |             | 7 | 13750001 | 13900000 |               | Improvement |
| 3 | 4550001  | 4600000  | Domestication |             | 7 | 14950001 | 15050000 | Domestication |             |
| 3 | 4650001  | 4700000  | Domestication |             | 7 | 15400001 | 15450000 | Domestication |             |
| 3 | 5200001  | 5300000  |               | Improvement | 7 | 15600001 | 15650000 | Domestication |             |
| 3 | 5300001  | 5350000  | Domestication |             | 7 | 17050001 | 17100000 | Domestication |             |
| 3 | 7500001  | 7550000  | Domestication |             | 7 | 17150001 | 17200000 | Domestication |             |
| 3 | 8050001  | 8100000  | Domestication |             | 7 | 17300001 | 17350000 | Domestication |             |
| 3 | 8550001  | 8600000  | Domestication |             | 7 | 17750001 | 17800000 |               | Improvement |
| 3 | 8650001  | 8750000  | Domestication |             | 7 | 17850001 | 17900000 | Domestication |             |
| 3 | 8850001  | 8900000  | Domestication |             | 7 | 18900001 | 18950000 | Domestication |             |
| 3 | 9100001  | 9200000  | Domestication |             | 7 | 19050001 | 19200000 |               | Improvement |
| 3 | 12450001 | 12500000 | Domestication |             | 7 | 19700001 | 19750000 | Domestication |             |
| 3 | 12600001 | 12650000 | Domestication |             | 7 | 20450001 | 20500000 | Domestication |             |
| 3 | 13000001 | 13050000 |               | Improvement | 7 | 20650001 | 20700000 |               | Improvement |
| 3 | 13100001 | 13150000 |               | Improvement | 7 | 20700001 | 20750000 | Domestication | Improvement |
| 3 | 13450001 | 13500000 |               | Improvement | 7 | 21850001 | 21950000 |               | Improvement |
| 3 | 13550001 | 13650000 |               | Improvement | 7 | 22000001 | 22050000 | Domestication | Improvement |
| 3 | 13850001 | 13900000 | Domestication |             | 7 | 22050001 | 22100000 | Domestication |             |
| 3 | 14700001 | 14750000 |               | Improvement | 7 | 22100001 | 22250000 |               | Improvement |
| 3 | 16000001 | 16050000 | Domestication |             | 8 | 1050001  | 1100000  |               | Improvement |
| 3 | 16550001 | 16600000 | Domestication |             | 8 | 1900001  | 1950000  |               | Improvement |
| 3 | 18700001 | 18750000 |               | Improvement | 8 | 2600001  | 2700000  |               | Improvement |
| 3 | 18950001 | 19050000 |               | Improvement | 8 | 2750001  | 2900000  |               | Improvement |
| 3 | 19050001 | 19250000 | Domestication |             | 8 | 3350001  | 3400000  |               | Improvement |
| 3 | 19300001 | 19350000 |               | Improvement | 8 | 8200001  | 8250000  |               | Improvement |
| 3 | 19400001 | 19450000 |               | Improvement | 8 | 10450001 | 10500000 |               | Improvement |
| 3 | 20600001 | 20650000 | Domestication |             | 8 | 11700001 | 11750000 | Domestication |             |
| 3 | 21200001 | 21300000 |               | Improvement | 8 | 12550001 | 12650000 | Domestication |             |
| 3 | 21400001 | 21500000 | Domestication |             | 8 | 12850001 | 12900000 | Domestication |             |
| 4 | 1650001  | 1950000  |               | Improvement | 8 | 13150001 | 13200000 |               | Improvement |
| 4 | 2000001  | 2300000  |               | Improvement | 8 | 14150001 | 14200000 | Domestication |             |
| 4 | 3350001  | 3400000  |               | Improvement | 8 | 14450001 | 14500000 | Domestication |             |
| 4 | 3700001  | 3750000  | Domestication |             | 8 | 14600001 | 14650000 | Domestication |             |
| 4 | 6800001  | 6850000  | Domestication |             | 8 | 14700001 | 14750000 | Domestication |             |
| 4 | 7600001  | 7650000  | Domestication |             | 8 | 15700001 | 15750000 | Domestication |             |

---

|          |         |         |               |          |          |          |               |
|----------|---------|---------|---------------|----------|----------|----------|---------------|
| <b>4</b> | 7700001 | 7850000 | Domestication | <b>8</b> | 18300001 | 18400000 | Domestication |
| <b>4</b> | 7950001 | 8150000 | Domestication | <b>8</b> | 19800001 | 19850000 | Domestication |
| <b>4</b> | 8350001 | 8500000 | Domestication | <b>8</b> | 21550001 | 21800000 | Domestication |

---

191

192 **Supplementary Table 13: Candidate genes identified within the overlapping**  
193 **regions of domestication and improvement sweep and fruit weight or soluble**  
194 **solid content association analysis.**

|                                                                                         | <b>Biological process</b>           | <b>Peach gene ID</b>                                                                                                                                                                                                                                                                                                                                                                                                                                                                                                                                                                                       |
|-----------------------------------------------------------------------------------------|-------------------------------------|------------------------------------------------------------------------------------------------------------------------------------------------------------------------------------------------------------------------------------------------------------------------------------------------------------------------------------------------------------------------------------------------------------------------------------------------------------------------------------------------------------------------------------------------------------------------------------------------------------|
| <b>The overlapping region of improvement sweep and fruit weight association signals</b> | Nitrogen compound metabolic process | ppa007510m, ppa002331m, ppa021345m, ppa012648m                                                                                                                                                                                                                                                                                                                                                                                                                                                                                                                                                             |
|                                                                                         | Catabolic process                   | ppa011112m, ppa004836m, ppa005453m                                                                                                                                                                                                                                                                                                                                                                                                                                                                                                                                                                         |
|                                                                                         | Biosynthetic process                | ppa007021m, ppa007023m, ppa021345m, ppa007510m, ppa014786m                                                                                                                                                                                                                                                                                                                                                                                                                                                                                                                                                 |
|                                                                                         | Macromolecule metabolic process     | ppa002234m, ppa002331m, ppa004836m, ppa005453m, ppa011112m, ppa012641m, ppa014805m, ppa021345m, ppa024695m, ppa024757m                                                                                                                                                                                                                                                                                                                                                                                                                                                                                     |
|                                                                                         | Cellular metabolic process          | ppa002234m, ppa002331m, ppa007021m, ppa007023m, ppa007510m, ppa011112m, ppa012641m, ppa012648m, ppa014786m, ppa014805m, ppa021345m, ppa024695m, ppa024757m                                                                                                                                                                                                                                                                                                                                                                                                                                                 |
|                                                                                         | Primary metabolic process           | ppa002234m, ppa002331m, ppa002727m, ppa002732m, ppa004378m, ppa004836m, ppa005453m, ppa007021m, ppa007023m, ppa007510m, ppa009638m, ppa009641m, ppa009655m, ppa011112m, ppa012641m, ppa012648m, ppa014786m, ppa014805m, ppa021345m, ppa024695m, ppa024757m                                                                                                                                                                                                                                                                                                                                                 |
|                                                                                         | Oxidation reduction                 | ppa003219m, ppa004476m, ppa004495m, ppa004579m, ppa004947m, ppa014786m, ppa020113m, ppa026124m                                                                                                                                                                                                                                                                                                                                                                                                                                                                                                             |
|                                                                                         | Cellular process                    | ppa000110m, ppa000314m, ppa001323m, ppa002234m, ppa002331m, ppa003476m, ppa004575m, ppa007021m, ppa007023m, ppa007510m, ppa011112m, ppa012641m, ppa012648m, ppa014786m, ppa014805m, ppa015394m, ppa015909m, ppa021345m, ppa021446m, ppa022308m, ppa024695m, ppa024757m, ppa027119m                                                                                                                                                                                                                                                                                                                         |
|                                                                                         | Cellular component organization     | ppa000314m, ppa021446m, ppa022308m                                                                                                                                                                                                                                                                                                                                                                                                                                                                                                                                                                         |
|                                                                                         | Pigmentation                        | ppa000110m, ppa004575m, ppa015394m                                                                                                                                                                                                                                                                                                                                                                                                                                                                                                                                                                         |
|                                                                                         | Cellular component biogenesis       | ppa003476m                                                                                                                                                                                                                                                                                                                                                                                                                                                                                                                                                                                                 |
|                                                                                         | Response to stimulus                | ppa002331m                                                                                                                                                                                                                                                                                                                                                                                                                                                                                                                                                                                                 |
|                                                                                         | Localization                        | ppa027119m, ppa027119m                                                                                                                                                                                                                                                                                                                                                                                                                                                                                                                                                                                     |
|                                                                                         | Establishment of localization       | ppa027119m, ppa015909m                                                                                                                                                                                                                                                                                                                                                                                                                                                                                                                                                                                     |
|                                                                                         | Biological regulation               | ppa000110m, ppa004575m, ppa015394m, ppa021277m                                                                                                                                                                                                                                                                                                                                                                                                                                                                                                                                                             |
|                                                                                         | No terms assigned in this category  | ppa000012m, ppa001708m, ppa002229m, ppa002451m, ppa003022m, ppa004401m, ppa004482m, ppa004671m, ppa005479m, ppa006158m, ppa006283m, ppa006728m, ppa010383m, ppa010699m, ppa010702m, ppa010703m, ppa011409m, ppa012185m, ppa012267m, ppa012348m, ppa012942m, ppa013169m, ppa013815m, ppa015556m, ppa015814m, ppa016961m, ppa017589m, ppa018285m, ppa018314m, ppa018337m, ppa018787m, ppa019578m, ppa019735m, ppa020139m, ppa020189m, ppa020346m, ppa021643m, ppa021765m, ppa022615m, ppa022622m, ppa023020m, ppa024416m, ppa025152m, ppa025538m, ppa025838m, ppa025855m, ppa026236m, ppa026854m, ppa021969m |
| <b>The overlapping</b>                                                                  | Catabolic process                   | ppb021028m, ppa015079m, ppa015434m, ppa026388m, ppb019796m                                                                                                                                                                                                                                                                                                                                                                                                                                                                                                                                                 |

|                                                                                     |                                     |                                                                                                                                                                                                                                                                                                                                                                                                                                                                                                                                    |
|-------------------------------------------------------------------------------------|-------------------------------------|------------------------------------------------------------------------------------------------------------------------------------------------------------------------------------------------------------------------------------------------------------------------------------------------------------------------------------------------------------------------------------------------------------------------------------------------------------------------------------------------------------------------------------|
| <b>region of domestication sweep and soluble solid content association signanls</b> | Nitrogen compound metabolic process | ppa003404m, ppa024202m                                                                                                                                                                                                                                                                                                                                                                                                                                                                                                             |
|                                                                                     | Biosynthetic process                | ppa024202m, ppa014441m, ppa003251m, ppa003404m                                                                                                                                                                                                                                                                                                                                                                                                                                                                                     |
|                                                                                     | Macromolecule metabolic process     | ppa001625m, ppa003651m, ppb021028m, ppa024202m, ppa014441m, ppa006217m, ppa015079m, ppa015434m, ppa026388m, ppb019796m                                                                                                                                                                                                                                                                                                                                                                                                             |
|                                                                                     | Cellular metabolic process          | ppa001625m, ppa003651m, ppa024202m, ppa014441m, ppa006217m, ppa003251m, ppa003404m                                                                                                                                                                                                                                                                                                                                                                                                                                                 |
|                                                                                     | Primary metabolic process           | ppa001625m, ppa003651m, ppb021028m, ppa006217m, ppa014441m, ppa015079m, ppa015434m, ppa026388m, ppb019796m, ppb021028m, ppa003404m, ppa003251m                                                                                                                                                                                                                                                                                                                                                                                     |
|                                                                                     | Oxidation reduction                 | ppa007597m, ppa007600m, ppa014989m, ppa024861m, ppa002564m, ppa003251m                                                                                                                                                                                                                                                                                                                                                                                                                                                             |
|                                                                                     | Cellular process                    | ppa001625m, ppa003651m, ppa024202m, ppa014441m, ppa006217m, ppa003251m, ppa003404m                                                                                                                                                                                                                                                                                                                                                                                                                                                 |
|                                                                                     | Localization                        | ppa010017m                                                                                                                                                                                                                                                                                                                                                                                                                                                                                                                         |
|                                                                                     | Establishment of localization       | ppa010017m                                                                                                                                                                                                                                                                                                                                                                                                                                                                                                                         |
|                                                                                     | No terms assigned in this category  | ppa008169m, ppa009145m, ppa011448m, ppa018288m, ppa021260m, ppa021752m, ppa023132m, ppa023632m, ppa023728m, ppa025543m, ppb016181m, ppb022060m, ppb023061m, ppa001962m, ppa005637m, ppa007362m, ppa009249m, ppa010706m, ppa011619m, ppa014427m, ppa015483m, ppa015866m, ppa016251m, ppa018013m, ppa018087m, ppa018183m, ppa020146m, ppa020360m, ppa021260m, ppa021786m, ppa022180m, ppa024597m, ppa025357m, ppb019814m, ppa025795m, ppa000835m, ppa005874m, ppa005999m, ppa008497m, ppa010592m, ppa010704m, ppa017699m, ppa018881m |

195 **Supplementary Table 14: Agronomic variation of the soluble sugar content and**  
 196 **titratable acid trait in 2014 in edible landraces and improved varieties of the 129**  
 197 **resequencing accessions.**

| Trait                            | Accession number   | Ornamental | Edible   | Improved variety |            |          |
|----------------------------------|--------------------|------------|----------|------------------|------------|----------|
|                                  |                    | landrace   | landrace | Total            | Occidental | Oriental |
|                                  | Accession number   | 9          | 53       | 55               | 10         | 45       |
| <b>Soluble sugar content (%)</b> | Minimum value      | 10.03      | 8.10     | 7.55             | 8.28       | 7.55     |
|                                  | Maximal value      | 14.71      | 15.55    | 20.28            | 12.50      | 20.28    |
|                                  | Average            | 12.57      | 11.39    | 11.32            | 10.43      | 11.66    |
|                                  | Standard deviation | 2.24       | 1.72     | 2.51             | 1.37       | 2.78     |
| <b>Titrateable acid (%)</b>      | Minimum value      | 0.57       | 0.16     | 0.14             | 0.51       | 0.14     |
|                                  | Maximal value      | 1.08       | 1.18     | 0.96             | 0.96       | 0.64     |
|                                  | Average            | 0.85       | 0.45     | 0.38             | 0.68       | 0.27     |
|                                  | Standard deviation | 0.23       | 0.27     | 0.24             | 0.16       | 0.14     |

198 **Supplementary Table 15: Whether is the regions with abnormal low  $r^2$  across**  
 199 **whole peach genome under domestication.**

| Scaffold | Physical location |           | LD      |                | D'/r <sup>2</sup> | Under domestication |
|----------|-------------------|-----------|---------|----------------|-------------------|---------------------|
|          | Start point       | End point | D'      | r <sup>2</sup> |                   |                     |
| 1        | 45300001          | 45350000  | 0.0981  | 0.0012         | 81.75             | Yes                 |
| 4        | 7600001           | 7650000   | 1       | 0.0173         | 57.80347          | Yes                 |
| 2        | 9000001           | 9050000   | 0.07421 | 0.00154        | 48.18831          | Yes                 |
| 8        | 13100001          | 13150000  | 0.8541  | 0.02204        | 38.75227          |                     |
| 4        | 14150001          | 14200000  | 0.60896 | 0.01818        | 33.49615          |                     |
| 5        | 18050001          | 18100000  | 0.55588 | 0.0234         | 23.75556          | Yes                 |
| 5        | 15600001          | 15650000  | 0.54655 | 0.02504        | 21.82708          |                     |
| 8        | 21450001          | 21500000  | 0.84545 | 0.04381        | 19.29811          |                     |
| 1        | 38850001          | 38900000  | 0.77029 | 0.04148        | 18.57015          |                     |
| 6        | 28600001          | 28650000  | 0.73592 | 0.04457        | 16.51155          | Yes                 |
| 1        | 38900001          | 38950000  | 0.59021 | 0.03697        | 15.96457          |                     |
| 1        | 38800001          | 38850000  | 0.58177 | 0.03651        | 15.93454          |                     |
| 4        | 24100001          | 24150000  | 0.73771 | 0.04673        | 15.78665          |                     |
| 4        | 2050001           | 2100000   | 0.91905 | 0.06189        | 14.84973          |                     |
| 4        | 16300001          | 16350000  | 0.54691 | 0.03787        | 14.44177          |                     |
| 1        | 16200001          | 16250000  | 0.58402 | 0.0432         | 13.51898          |                     |
| 4        | 17100001          | 17150000  | 0.60835 | 0.04538        | 13.40569          |                     |
| 5        | 12250001          | 12300000  | 0.48893 | 0.03689        | 13.25373          | Yes                 |
| 7        | 15050001          | 15100000  | 0.49892 | 0.03798        | 13.13639          |                     |
| 3        | 12850001          | 12900000  | 0.56495 | 0.04369        | 12.93088          |                     |
| 2        | 8200001           | 8250000   | 0.49557 | 0.03955        | 12.53021          |                     |
| 1        | 41300001          | 41350000  | 0.48248 | 0.03852        | 12.52544          | Yes                 |

200 **Supplementary Table 16: Correlation between the geographic origin and the**  
 201 **hierarchical cluster analysis of the landrace groups.**

| Geographic population | Total | Dendrogram based genetic similarity |           |           |           |           |           | $\chi^2$              |
|-----------------------|-------|-------------------------------------|-----------|-----------|-----------|-----------|-----------|-----------------------|
|                       |       | Subgroup1                           | Subgroup2 | Subgroup3 | Subgroup4 | Subgroup5 | Subgroup6 |                       |
| SC                    | 2     | 2                                   | 0         | 0         | 0         | 0         | 0         | $\chi^2=64.15$        |
| MLCJ                  | 12    | 2                                   | 0         | 5         | 1         | 4         | 0         | P<0.01                |
| NC                    | 11    | 0                                   | 1         | 7         | 0         | 3         | 0         | $\chi^2_{0.01, 25} =$ |
| NWC                   | 11    | 0                                   | 0         | 0         | 11        | 0         | 0         | 44.31                 |
| NEC                   | 1     | 0                                   | 0         | 1         | 0         | 0         | 0         |                       |
| YGC                   | 3     | 0                                   | 0         | 0         | 0         | 1         | 2         |                       |
| <b>Total</b>          | 40    | 4                                   | 1         | 13        | 12        | 8         | 2         |                       |



202 **Supplementary Notes 1**

203 **Polymorphism change during peach domestication.** Different with previous study  
204 which focused on genomic polymorphism, we mainly analyzed the heterozygosity  
205 rates of all accessions (Supplementary Table 3) and on how they differed between  
206 species groups to evaluate genomic variation. Within the wild species group,  
207 heterozygosity rates increased from almond (1.90%) to *P. mira* (2.61%), and  
208 increasing abruptly in *P. davidiana* (5.91%). As peach evolution continued,  
209 heterozygosity rates decreased, as can be determined from the values obtained for *P.*  
210 *kansuensis* (1.60%) and ornamental landraces (can be reckoned as wild *P. persica*,  
211 1.25%) (Supplementary Table 5). This general decrease in heterozygosity rates during  
212 evolution might be due to peach's self-pollination system<sup>1</sup>. The abnormally high  
213 diversity found in *P. davidiana*, on the other hand, is in accordance with its wider  
214 geographical, climatic, and cultural range compared to the other *Prunus* species.  
215 Among the cultivated groups, the heterozygosity rate observed in the 55 improved  
216 varieties was higher than that of the 53 edible landraces (2.50% vs. 2.32%),  
217 suggesting that improved varieties tend to be more heterozygous than edible landraces  
218 (Supplementary Table 5). However, improved varieties had a lower number of SNPs  
219 than edible landraces (Supplementary Table 6). This trend might be explained by the  
220 outcross of most Chinese, European, and North American cultivars with a few founder  
221 parents, such as 'Chinese cling'<sup>2</sup>. And among improved varieties, we found a small  
222 reduction in the  $\pi$  value of all 10 occidental varieties ( $1.38 \times 10^{-3}$ ) in contrast to the  
223 other 45 oriental ones ( $1.55 \times 10^{-3}$ ) (Supplementary Table 6). The low polymorphism  
224 observed in occidental varieties is also in agreement with their low heterozygosity rate  
225 (1.57%) compared to oriental peach (2.71%) (Supplementary Table 5). However, the  
226 unbalanced sample number (10 vs. 45) might be contributing to the observed  
227 differences between these two groups. The relationships depicted here were consistent  
228 with the conclusions of the International Peach Genome Initiative<sup>3</sup>, which suggested  
229 that a bottleneck existed between eastern and western varieties, related to the recent  
230 introduction of peach to the United States (16<sup>th</sup> to 19<sup>th</sup> century).

231

232 **The evolution of different geographic subgroups in landraces.** The edible  
233 landraces group were divided into six subgroups according to phylogenetic analysis  
234 (Supplementary Fig. 24).

235 Simultaneously, these landraces also can be clustered into six populations based on  
236 geographic origin (Supplementary Table 3): Northwest China (NWC), YunGui plateau  
237 (YGC), Northeast China (NEC), Northern China (NC), the middle and lower reaches  
238 of the Changjiang River (MLCJ), and Southern China (SC). Here we found that  
239 subgroup 1 should be considered as an admixed population as it contains accessions  
240 from the SC and MLCJ populations. Subgroup 2 consisted of only one accession from  
241 the NC population whereas subgroups 3 and 5 were mostly composed of NC and  
242 MLCJ populations' accessions. Subgroup 4 contained 12 accessions, all of which  
243 originated from the NWC population, and subgroup 6 included two accessions from  
244 the YGC population (Supplementary Fig. 3c). The correlation between the two  
245 classifications was analysed in all accessions, and the highly significant association  
246 ( $\chi^2 = 64.15 \geq \chi^2_{0.01, 25} = 44.31$ ) between the hierarchical clusters (subgroups) based on  
247 geographic regions and the phylogenetic groups was found, revealing that peach  
248 evolution corresponded mirrored anthropogenic activity across geographic regions  
249 (Supplementary Table 16).

250 Meanwhile, although it was widely accepted that peach domestication originated in  
251 NWC<sup>4</sup> or NC<sup>5</sup>, a recent archaeological study proposed that the lower Yangzi River  
252 valley (equivalent to MLCJ in this study) was the primary site of peach selection and  
253 domestication<sup>6</sup>. According to Supplementary Fig. 3a, subgroup 1 comprises the most  
254 primitive edible landraces, which is in agreement with the archaeological data<sup>6</sup>  
255 because SC and MLCJ populations are within the Yangtze and Pearl river valleys,  
256 respectively, being areas of ancient human activity. As domestication can be regarded  
257 as the first stage of plant breeding, and geographical differences among cultivated  
258 species are likely to result from migration and subsequent differential selection by  
259 local farmers<sup>7</sup>, peach distribution in the SC and MLCJ regions may reflect the  
260 influence of human activity on the evolution of peach.

261 **Supplementary References**

- 262 1. Wang, Z. H. & Zhuang, E. J. *China Fruit Monograph-Peach Flora*. Beijing:  
263 *China Forestry Press* (2001).
- 264 2. Infante, R., Martínez, G. P. & Predieri, S. Quality oriented fruit breeding: peach  
265 [*Prunus persica* (L.) batsch]. *J. Food Agric. Environ.* **6**, 342-356 (2008).
- 266 3. The International Peach Genome Initiative. The high-quality draft genome of  
267 peach (*Prunus persica*) identifies unique patterns of genetic diversity,  
268 domestication and genome evolution. *Nat. Genet.* **45**, 487-494 (2013).
- 269 4. Faust, M. & Timon, B. *Origin and dissemination of peach*. *Horticultural Reviews*  
270 **17**, 331-379 (1995).
- 271 5. Li, H. L. The domestication of plants in China: Ecogeographical considerations.  
272 In: Keightley DN, editor. *The Origins of Chinese Civilization*. Berkeley, CA:  
273 *University of California Press*. pp. 21–63 (1988).
- 274 6. Zheng, Y. F., Crawford, G. W. & Chen, X. G. Archaeological evidence for peach  
275 (*Prunus persica*) cultivation and domestication in China. *PLoS One* **9**, e106595  
276 (2014).
- 277 7. Gross, B. L. & Olsen, K. M. Genetic perspectives on crop domestication. Trends  
278 in *Plant Sci.* **15**, 529-537 (2010).
